# Supplementary material for: EST-SSR Primer Development and Genetic Structure Analysis of Psathyrostachys juncea Nevski
Source: Front Plant Sci. 2022 Feb 28;13:837787. doi: 10.3389/fpls.2022.837787 (PMC8919075; doi:10.3389/fpls.2022.837787)
Supplement: Supplementary file 4 [file Table_4.XLSX]

## Sheet: Sheet1
1																											遗传相似性系数变幅		平均值								0.689902	0.660391
0.7658120	1																										Varieties code	Range of similarity coefficients	Mean	Varieties code	Range of similarity coefficients	Mean					0.63088
0.7356322	0.824615	1																									531828	0.6490-0.8878	0.797972	565052	0.5236-0.9014	0.665323
0.7072000	0.786787	0.846377	1																								595135	0.6391-0.8924	0.781661	531827	0.5217-0.9050	0.614605
0.7004910	0.760736	0.807692	0.84104	1																							619487	0.5822-0.8829	0.737071	272136	0.5190-0.8669	0.618248
0.7109635	0.762053	0.818591	0.781845	0.804185	1																						200802	0.5222-0.8829	0.729161	502573	0.5316-0.9019	0.616571
0.6803150	0.766272	0.797143	0.796089	0.780627	0.764791	1																					502577	0.5008-0.8636	0.632257	598614	0.5223-0.9036	0.631369
0.7051282	0.760902	0.835994	0.822695	0.801737	0.809384	0.822378	1																				200801	0.5031-0.8975	0.658092	476299	0.5191-0.8904	0.622982
0.6827068	0.767705	0.838356	0.836461	0.825137	0.782849	0.843915	0.851007	1																			502576	0.5009-0.8802	0.645767	619565	0.5147-0.8919	0.619949
0.6907994	0.758523	0.826923	0.811828	0.79726	0.782247	0.819629	0.820996	0.877551	1																		565060	0.5104-0.8895	0.677231	531826	0.5136-0.8981	0.636966
0.7085890	0.782107	0.822873	0.815825	0.806676	0.811268	0.794078	0.833333	0.848642	0.853437	1																	565051	0.5138-0.8709	0.634346	502572	0.5307-0.8959	0.634746
0.6907378	0.758112	0.811966	0.799443	0.75	0.748201	0.788462	0.822873	0.817942	0.843915	0.848322	1																578854	0.5390-0.8692	0.647133	598610	0.5145-0.9111	0.64804
0.6719243	0.77037	0.798283	0.813986	0.773181	0.760116	0.805517	0.795518	0.823841	0.823373	0.822102	0.822558	1															619483	0.5272-0.8851	0.648228
0.6973886	0.751445	0.793296	0.795082	0.774373	0.770099	0.787062	0.79617	0.829016	0.836364	0.819499	0.841398	0.850202	1
0.7138365	0.78582	0.824536	0.834031	0.796586	0.769452	0.784044	0.826816	0.834874	0.82649	0.827957	0.814815	0.84022	0.845222	1
0.6716418	0.748242	0.797279	0.796272	0.751696	0.747253	0.801577	0.781333	0.826801	0.841572	0.822622	0.815203	0.815789	0.849421	0.800525	1
0.6825633	0.730337	0.769022	0.779255	0.772358	0.746228	0.792651	0.804261	0.823232	0.83038	0.813864	0.803665	0.812089	0.8509	0.844037	0.853199	1
0.6676602	0.752809	0.804348	0.808511	0.766938	0.768176	0.824147	0.809587	0.840909	0.835443	0.826701	0.808901	0.843627	0.85347	0.828309	0.873275	0.872181	1
0.6816143	0.729577	0.787466	0.778667	0.766304	0.770289	0.797368	0.811749	0.825317	0.835025	0.823681	0.826772	0.798419	0.832474	0.804205	0.85283	0.874372	0.876884	1
0.6896552	0.725989	0.762295	0.780749	0.773842	0.73931	0.810026	0.795181	0.817259	0.829516	0.812903	0.815789	0.80317	0.826873	0.801054	0.839849	0.869018	0.874055	0.883838	1
0.6489676	0.723227	0.756393	0.769433	0.74094	0.747283	0.798439	0.76781	0.81602	0.810539	0.78626	0.775616	0.778646	0.82293	0.787013	0.845771	0.852174	0.852174	0.859278	0.851436	1
0.6656805	0.739191	0.785425	0.787318	0.748318	0.743869	0.797914	0.78836	0.815558	0.832704	0.808674	0.829649	0.817232	0.840358	0.833333	0.855362	0.854296	0.846824	0.876405	0.85607	0.849383	1
0.6895522	0.765119	0.805442	0.790945	0.748982	0.755494	0.819974	0.797333	0.824273	0.841572	0.827763	0.838794	0.813158	0.833977	0.816273	0.849246	0.848181	0.85069	0.867924	0.849937	0.848259	0.88778	1
0.6528190	0.718881	0.752368	0.74702	0.726046	0.721311	0.776471	0.769231	0.792453	0.824716	0.813299	0.821382	0.798429	0.824584	0.793734	0.835	0.841448	0.826467	0.848561	0.835634	0.819307	0.861042	0.8775	1
0.6800000	0.746744	0.777622	0.752394	0.736402	0.737288	0.769231	0.764384	0.801556	0.811443	0.794195	0.810229	0.794595	0.834874	0.797844	0.811856	0.805663	0.815959	0.812903	0.799482	0.793367	0.823529	0.842784	0.835897	1
0.6748466	0.744589	0.775453	0.769441	0.739917	0.749296	0.761777	0.781421	0.781371	0.811933	0.802632	0.805369	0.800539	0.811594	0.811828	0.807198	0.813864	0.818999	0.808237	0.818064	0.783715	0.803571	0.809769	0.800512	0.815303	1
0.6687500	0.722467	0.771631	0.757282	0.732673	0.74212	0.76881	0.763889	0.785808	0.801054	0.772727	0.78854	0.775343	0.784471	0.775956	0.804177	0.795306	0.805737	0.802614	0.804718	0.79845	0.813472	0.806789	0.794805	0.815013	0.826203	1
0.6815287	0.735426	0.750361	0.764457	0.756834	0.749271	0.776078	0.785311	0.801068	0.787149	0.777174	0.782247	0.78273	0.789116	0.783333	0.782493	0.802649	0.797351	0.794157	0.804261	0.784777	0.771053	0.785146	0.78628	0.790191	0.828804	0.790055	1
0.6656250	0.713656	0.748936	0.757282	0.755304	0.727794	0.787962	0.791667	0.812089	0.787879	0.786096	0.780355	0.772603	0.789826	0.756831	0.793734	0.813559	0.808344	0.815686	0.815203	0.790698	0.779793	0.796345	0.787013	0.780161	0.818182	0.815217	0.823204	1
0.6615620	0.723343	0.771588	0.768392	0.747222	0.739803	0.774193	0.791269	0.79845	0.803109	0.798949	0.798928	0.799462	0.8	0.797315	0.808729	0.825641	0.805128	0.807198	0.824742	0.795426	0.820382	0.826701	0.802043	0.798419	0.798949	0.82243	0.830394	0.833111	1
0.6677165	0.715976	0.751429	0.773743	0.766382	0.744589	0.757576	0.791608	0.791005	0.782493	0.783311	0.788462	0.783448	0.784367	0.786795	0.770039	0.821522	0.816273	0.815789	0.810026	0.775033	0.777053	0.791064	0.771242	0.782726	0.804845	0.801642	0.834492	0.829001	0.836021	1
0.6718507	0.730994	0.759887	0.745856	0.715493	0.747504	0.749319	0.782849	0.793194	0.80315	0.774967	0.793478	0.780355	0.776	0.772789	0.782835	0.792208	0.78961	0.804688	0.804177	0.772201	0.771613	0.788036	0.781371	0.793057	0.806924	0.828146	0.817056	0.828146	0.829787	0.831063	1
0.6635802	0.714078	0.740533	0.765432	0.74965	0.733711	0.768606	0.796703	0.798439	0.800521	0.78836	0.79892	0.766938	0.77351	0.775676	0.795866	0.807742	0.8	0.809832	0.840467	0.803069	0.802564	0.808786	0.796915	0.793103	0.812169	0.825269	0.827869	0.817204	0.834874	0.838972	0.846051	1
0.6391437	0.693525	0.753825	0.780952	0.754508	0.738764	0.77047	0.787466	0.794839	0.789133	0.792651	0.792503	0.784946	0.804205	0.780161	0.78718	0.801536	0.791293	0.785623	0.800515	0.779188	0.80916	0.817949	0.798469	0.792105	0.808399	0.821333	0.818428	0.797333	0.825688	0.845638	0.826029	0.836412	1
0.6740157	0.736686	0.76	0.765363	0.737892	0.727273	0.760331	0.772028	0.796296	0.809019	0.794078	0.81044	0.786207	0.80593	0.786795	0.796321	0.80315	0.7979	0.802632	0.828496	0.780234	0.795306	0.82523	0.807843	0.790823	0.818304	0.809849	0.820584	0.809849	0.833333	0.831956	0.836512	0.871448	0.845638	1
0.6452599	0.707914	0.74548	0.770068	0.729542	0.702247	0.746309	0.760218	0.763871	0.783959	0.774278	0.811245	0.77957	0.775296	0.766756	0.776923	0.778489	0.763124	0.77792	0.790219	0.751269	0.793893	0.810256	0.816326	0.789474	0.782152	0.786667	0.788618	0.794667	0.812582	0.808054	0.794157	0.828496	0.856021	0.853691	1
0.6542056	0.708638	0.732673	0.744122	0.702398	0.697143	0.744884	0.761773	0.754915	0.764783	0.752	0.759184	0.775956	0.771696	0.771117	0.75	0.793238	0.785436	0.774446	0.779085	0.742268	0.77261	0.778646	0.772021	0.786096	0.805333	0.796748	0.782369	0.807588	0.764314	0.80764	0.823212	0.823056	0.803191	0.815825	0.808511	1
0.6656299	0.725146	0.725989	0.754144	0.726761	0.701855	0.752044	0.755187	0.756544	0.766404	0.766977	0.774456	0.780355	0.768	0.767347	0.790637	0.787013	0.794805	0.783854	0.78329	0.772201	0.781936	0.793238	0.778784	0.790387	0.814913	0.809202	0.819807	0.809202	0.803191	0.803815	0.811321	0.827309	0.812749	0.841962	0.804781	0.844804	1
0.6513057	0.725433	0.756983	0.784153	0.743733	0.730607	0.77089	0.771546	0.795337	0.792208	0.774704	0.776882	0.79892	0.788918	0.802153	0.790219	0.812339	0.827763	0.814433	0.819121	0.77707	0.825032	0.818533	0.816901	0.800528	0.827404	0.827309	0.8	0.803213	0.805263	0.819407	0.824	0.858278	0.838371	0.862534	0.848883	0.846462	0.858667	1
0.6562009	0.710915	0.735043	0.760446	0.744318	0.736691	0.769231	0.772664	0.794195	0.785714	0.778524	0.775343	0.789546	0.793011	0.770919	0.812582	0.811518	0.814136	0.818898	0.821053	0.788586	0.795839	0.809961	0.808344	0.815612	0.824161	0.829468	0.823856	0.818554	0.817694	0.821429	0.820652	0.863698	0.832664	0.848901	0.819277	0.810884	0.836956	0.865591	1
0.6677266	0.728358	0.752161	0.757746	0.752874	0.730713	0.780556	0.784203	0.8	0.778075	0.770692	0.786704	0.76217	0.771739	0.776699	0.786755	0.804233	0.796296	0.811671	0.81383	0.778506	0.796321	0.810596	0.779974	0.791837	0.80597	0.830345	0.824684	0.81931	0.815718	0.811111	0.82967	0.854025	0.806495	0.844444	0.809202	0.822558	0.848901	0.850544	0.861496	1
0.6592710	0.714286	0.755747	0.769663	0.739255	0.725689	0.753463	0.765119	0.795213	0.786667	0.7659	0.765193	0.771151	0.764228	0.796681	0.75033	0.794195	0.796834	0.777778	0.793103	0.771242	0.783748	0.774108	0.751643	0.770692	0.820027	0.817056	0.816783	0.80055	0.802703	0.803324	0.80548	0.829932	0.807018	0.831025	0.807018	0.817558	0.80548	0.856369	0.834254	0.840782	1
0.6633499	0.698758	0.751497	0.75731	0.737313	0.723147	0.757925	0.77306	0.78453	0.775623	0.779184	0.775862	0.756133	0.749296	0.791367	0.751715	0.780822	0.769863	0.769231	0.779614	0.746269	0.770068	0.776406	0.747613	0.770099	0.798875	0.821173	0.809316	0.783977	0.811798	0.786744	0.803419	0.834512	0.810659	0.821326	0.796634	0.796006	0.820513	0.833803	0.83046	0.843023	0.852174	1
0.6826923	0.730827	0.75762	0.765957	0.746744	0.730205	0.766434	0.764204	0.781208	0.777927	0.781421	0.772664	0.764706	0.779754	0.784916	0.76	0.793609	0.793609	0.801068	0.792503	0.775726	0.772487	0.786667	0.758621	0.775343	0.806011	0.763889	0.822034	0.777778	0.774898	0.808392	0.821577	0.81044	0.792915	0.81958	0.787466	0.797784	0.827109	0.834473	0.814505	0.823695	0.827004	0.82284	1
0.6424051	0.710253	0.743185	0.762973	0.738197	0.727536	0.741355	0.755618	0.762284	0.774967	0.754054	0.769655	0.753463	0.757781	0.767956	0.754617	0.779974	0.774704	0.782034	0.781457	0.765013	0.787958	0.775726	0.753281	0.766938	0.8	0.782967	0.793296	0.802198	0.790823	0.807746	0.804378	0.817935	0.808625	0.821577	0.800539	0.8	0.834473	0.844384	0.824828	0.817294	0.837274	0.845152	0.811798	1
0.6656000	0.723724	0.773913	0.753541	0.748555	0.726208	0.77095	0.780142	0.809651	0.795699	0.793997	0.774373	0.774825	0.765027	0.772664	0.782956	0.797872	0.792553	0.8	0.786096	0.782609	0.787318	0.806924	0.792053	0.779754	0.78854	0.796117	0.820874	0.815534	0.820164	0.810056	0.820442	0.825789	0.810884	0.835195	0.802721	0.780083	0.814917	0.836066	0.844011	0.825352	0.83427	0.836257	0.822695	0.84432	1
0.6784000	0.738739	0.765217	0.770538	0.734104	0.720351	0.765363	0.771631	0.772118	0.795699	0.785812	0.799443	0.78042	0.778689	0.764296	0.780293	0.797872	0.784574	0.802667	0.786096	0.769433	0.782034	0.82024	0.8	0.78249	0.799454	0.790569	0.818054	0.801664	0.814714	0.810056	0.814917	0.834019	0.816326	0.863128	0.813605	0.785616	0.831492	0.825137	0.832869	0.830986	0.814607	0.830409	0.828369	0.85554	0.892351	1
0.6479339	0.724458	0.758209	0.74344	0.71131	0.708899	0.747126	0.756204	0.746556	0.740332	0.754558	0.762178	0.756834	0.738764	0.743185	0.733242	0.748634	0.745902	0.756164	0.744506	0.730717	0.762551	0.777018	0.770068	0.767933	0.771389	0.756063	0.763425	0.747504	0.778712	0.747126	0.786932	0.778561	0.772028	0.787356	0.783217	0.756757	0.767046	0.792135	0.776504	0.77971	0.789017	0.78012	0.762044	0.787879	0.816326	0.868805	1
0.6602564	0.730827	0.769231	0.75461	0.732272	0.71261	0.758042	0.738636	0.751678	0.777927	0.765027	0.767085	0.767507	0.763338	0.731844	0.738667	0.750999	0.788282	0.755674	0.763052	0.733509	0.751323	0.773333	0.766578	0.761644	0.756831	0.75	0.765537	0.758333	0.758527	0.755245	0.752421	0.752747	0.757493	0.766434	0.741144	0.739612	0.757953	0.777018	0.778243	0.767278	0.767933	0.749634	0.772727	0.772472	0.8	0.828369	0.794161	1
0.6622735	0.709877	0.747024	0.726744	0.709199	0.700752	0.73639	0.730713	0.722527	0.752066	0.732867	0.734286	0.728838	0.753501	0.723891	0.725784	0.735695	0.735695	0.73224	0.726027	0.704453	0.738836	0.755798	0.743555	0.762973	0.760839	0.756757	0.755427	0.748222	0.776536	0.744986	0.753541	0.73699	0.755927	0.770774	0.747559	0.726241	0.756374	0.759104	0.762857	0.748555	0.740634	0.732733	0.751092	0.76259	0.796512	0.831395	0.781437	0.832605	1
0.6688963	0.710485	0.751131	0.727541	0.724812	0.707317	0.751814	0.746313	0.734353	0.741981	0.72238	0.740955	0.72093	0.757447	0.753623	0.740332	0.769655	0.73931	0.780083	0.757282	0.740437	0.761644	0.751381	0.739011	0.758523	0.76204	0.772334	0.780059	0.760807	0.763791	0.754717	0.763271	0.760684	0.748588	0.766328	0.725989	0.741379	0.774749	0.768794	0.781476	0.781845	0.750365	0.782344	0.766962	0.795918	0.801178	0.818851	0.76783	0.80531	0.816944
0.6484642	0.704944	0.737327	0.74063	0.722818	0.698758	0.723781	0.732733	0.729844	0.720567	0.708934	0.72165	0.733728	0.741703	0.740413	0.713483	0.743338	0.754558	0.728551	0.739069	0.705556	0.721449	0.727528	0.692737	0.731214	0.752161	0.750733	0.749254	0.739003	0.753957	0.759232	0.738686	0.73913	0.741379	0.738552	0.698276	0.710526	0.753285	0.776335	0.75405	0.751118	0.760773	0.75969	0.747748	0.768546	0.767616	0.770615	0.741886	0.798799	0.795069
0.6493955	0.680645	0.714286	0.70303	0.681115	0.681319	0.731343	0.728376	0.72	0.690544	0.701601	0.714286	0.699552	0.708455	0.727273	0.695036	0.733711	0.719547	0.71875	0.732194	0.706872	0.731364	0.743262	0.70804	0.70365	0.713246	0.722963	0.720965	0.708148	0.72093	0.716418	0.710915	0.729136	0.719884	0.710448	0.693759	0.697194	0.716814	0.737609	0.723214	0.743976	0.711712	0.742947	0.719272	0.731634	0.736364	0.745455	0.709375	0.719272	0.716511
0.6588235	0.676101	0.730303	0.724852	0.694864	0.689127	0.731778	0.74963	0.726257	0.717087	0.733997	0.732558	0.724088	0.712251	0.751092	0.729542	0.750692	0.736842	0.75	0.735376	0.729767	0.742779	0.765603	0.722759	0.727532	0.739687	0.735166	0.748159	0.735166	0.752841	0.740525	0.720461	0.752504	0.743262	0.755102	0.731915	0.727273	0.746398	0.754986	0.75	0.744118	0.733138	0.764526	0.743704	0.75549	0.775148	0.786982	0.728658	0.743704	0.74772
0.6353323	0.677812	0.721408	0.707736	0.701754	0.675556	0.725989	0.72023	0.737127	0.706522	0.725517	0.71831	0.724187	0.696133	0.716502	0.710633	0.736559	0.736559	0.74124	0.748649	0.727031	0.726302	0.751009	0.720214	0.705394	0.728276	0.732118	0.724679	0.740533	0.732782	0.734463	0.731844	0.740638	0.731774	0.740113	0.734525	0.718881	0.751397	0.776243	0.740845	0.732194	0.735796	0.742604	0.731707	0.729078	0.747851	0.74212	0.722714	0.728838	0.708824
0.6186579	0.647239	0.721893	0.713873	0.702065	0.675635	0.737892	0.732272	0.748634	0.734247	0.72879	0.744318	0.71612	0.72702	0.728307	0.7327	0.720867	0.723577	0.733696	0.749319	0.730201	0.73755	0.748982	0.723347	0.708508	0.72879	0.724187	0.713669	0.729844	0.747222	0.746439	0.721127	0.744056	0.723994	0.737892	0.73509	0.696756	0.721127	0.752089	0.735796	0.727012	0.719198	0.734328	0.729378	0.735336	0.757225	0.754335	0.720238	0.723589	0.738872
0.6089744	0.649624	0.711176	0.695036	0.709117	0.662757	0.732867	0.710227	0.738255	0.716016	0.70765	0.708508	0.70028	0.697674	0.698324	0.682667	0.700399	0.716378	0.726302	0.717537	0.733509	0.716931	0.738667	0.710875	0.717808	0.718579	0.711111	0.714689	0.716667	0.717599	0.73007	0.68603	0.717033	0.713897	0.704895	0.705722	0.689751	0.727524	0.725034	0.70014	0.693935	0.68917	0.72328	0.710227	0.741573	0.734752	0.737589	0.709489	0.71875	0.727802
0.6022544	0.640483	0.688047	0.68661	0.668605	0.656848	0.705056	0.704708	0.706199	0.691892	0.688615	0.70028	0.694796	0.695055	0.712483	0.696118	0.713904	0.700535	0.715818	0.72043	0.709934	0.733068	0.722892	0.727031	0.704264	0.718793	0.691771	0.712057	0.705718	0.726027	0.710674	0.708333	0.747586	0.72777	0.724719	0.719562	0.709318	0.719444	0.747253	0.714286	0.713881	0.69209	0.723529	0.707561	0.722144	0.737892	0.735043	0.706745	0.701855	0.71345
0.6099518	0.665663	0.718023	0.690341	0.684058	0.67254	0.731092	0.722617	0.741935	0.735849	0.71409	0.717877	0.726508	0.728767	0.710489	0.723631	0.741333	0.744	0.745989	0.745308	0.721268	0.728477	0.742323	0.73838	0.716049	0.744186	0.731572	0.724187	0.737135	0.737705	0.72549	0.739612	0.753783	0.723056	0.756302	0.723056	0.715673	0.742382	0.758904	0.743017	0.717514	0.715493	0.741935	0.725462	0.751055	0.772727	0.778409	0.74269	0.745377	0.746356
0.6250000	0.675477	0.70922	0.704577	0.698727	0.69341	0.716826	0.744444	0.74113	0.719368	0.735294	0.736699	0.736986	0.730924	0.718579	0.707572	0.730117	0.732725	0.734641	0.752294	0.731266	0.725389	0.741514	0.742857	0.718499	0.743316	0.717391	0.737569	0.736413	0.728972	0.733242	0.73613	0.755376	0.730667	0.730506	0.733333	0.715447	0.722598	0.744311	0.731241	0.725517	0.704264	0.723891	0.7	0.711538	0.721221	0.740638	0.738944	0.744444	0.725462
0.6015748	0.668639	0.691429	0.689944	0.680912	0.655123	0.721763	0.702098	0.719577	0.708223	0.718708	0.730769	0.714483	0.71159	0.69326	0.688568	0.716535	0.724409	0.715789	0.720317	0.702211	0.722295	0.725361	0.726797	0.704453	0.718708	0.719562	0.717663	0.71409	0.723118	0.713499	0.700272	0.719892	0.711409	0.710744	0.724832	0.698499	0.72752	0.735849	0.717033	0.713889	0.706371	0.70317	0.702098	0.705394	0.726257	0.717877	0.712644	0.732867	0.724928
0.6180124	0.686131	0.730607	0.722759	0.703235	0.689459	0.745578	0.737569	0.752941	0.726081	0.728723	0.740841	0.749319	0.743009	0.733696	0.72987	0.749676	0.747082	0.743823	0.756193	0.74036	0.739691	0.758442	0.739018	0.722667	0.734043	0.727027	0.747253	0.727027	0.756972	0.734694	0.7214	0.754011	0.742706	0.770068	0.750663	0.725067	0.745626	0.764314	0.762551	0.740741	0.744186	0.751067	0.732044	0.724044	0.744828	0.758621	0.717731	0.756906	0.724187
0.6085578	0.642857	0.718391	0.727528	0.704871	0.679245	0.736842	0.728551	0.728723	0.72	0.730717	0.729282	0.729542	0.718157	0.719225	0.713342	0.720317	0.744063	0.73545	0.732096	0.734641	0.720839	0.745046	0.720105	0.719132	0.733424	0.726272	0.713287	0.718019	0.727027	0.742382	0.723288	0.748299	0.734143	0.742382	0.736842	0.721536	0.742466	0.764228	0.740332	0.731844	0.721449	0.733333	0.7173	0.734353	0.75	0.755618	0.725433	0.748242	0.73487
0.6107595	0.650817	0.705882	0.695652	0.680973	0.663768	0.724758	0.741573	0.735724	0.713715	0.718919	0.731035	0.711911	0.700947	0.712707	0.704485	0.727273	0.716732	0.729194	0.733775	0.710183	0.71466	0.733509	0.716535	0.718157	0.710811	0.714286	0.723464	0.717033	0.734143	0.710927	0.719562	0.733696	0.706199	0.724758	0.716981	0.69863	0.71409	0.733424	0.728276	0.736402	0.703755	0.735166	0.707865	0.722222	0.734923	0.737728	0.718615	0.72191	0.716547
0.5821596	0.629412	0.684659	0.694444	0.674221	0.659971	0.693151	0.709318	0.721053	0.709762	0.706827	0.696721	0.710562	0.702413	0.70041	0.700654	0.725849	0.707572	0.722513	0.724409	0.719275	0.723735	0.71634	0.702211	0.689933	0.712182	0.715646	0.697095	0.737415	0.729947	0.717808	0.710027	0.729475	0.712951	0.712329	0.712951	0.700136	0.712737	0.734584	0.745902	0.71547	0.713499	0.733524	0.700974	0.726272	0.733333	0.722222	0.674286	0.703755	0.703704
0.6202532	0.659733	0.71736	0.715287	0.718169	0.684058	0.721992	0.755618	0.743692	0.721704	0.737838	0.717241	0.731302	0.714479	0.729282	0.712401	0.735178	0.735178	0.729194	0.736424	0.733681	0.725131	0.738786	0.700787	0.685637	0.727027	0.725275	0.734637	0.739011	0.761134	0.741355	0.744186	0.755435	0.746631	0.752421	0.716981	0.709589	0.72777	0.749662	0.728276	0.725244	0.726008	0.732272	0.727528	0.747222	0.757363	0.762973	0.727273	0.730337	0.72518
0.5828025	0.621824	0.707071	0.699577	0.693525	0.676385	0.700974	0.734463	0.734312	0.720214	0.720109	0.712899	0.707521	0.69932	0.713889	0.70557	0.723179	0.723179	0.749004	0.740346	0.729659	0.726316	0.721485	0.704485	0.697548	0.730978	0.712707	0.727528	0.734807	0.746269	0.742698	0.74553	0.759563	0.726287	0.742698	0.712737	0.699724	0.729023	0.748299	0.73509	0.726508	0.724476	0.748181	0.728814	0.748603	0.767278	0.753174	0.728592	0.731638	0.709117
0.5923567	0.639761	0.707071	0.699577	0.707914	0.664723	0.737135	0.734463	0.744993	0.720214	0.725544	0.707351	0.732591	0.707483	0.702778	0.713528	0.733775	0.723179	0.733068	0.729694	0.716535	0.713158	0.713528	0.71504	0.705722	0.728261	0.71547	0.735955	0.737569	0.757123	0.753825	0.726272	0.759563	0.728997	0.742698	0.739837	0.719008	0.731774	0.756463	0.732316	0.712483	0.707692	0.72198	0.711864	0.731844	0.739069	0.724965	0.711176	0.714689	0.726483
0.6116208	0.656115	0.69541	0.704762	0.712899	0.674157	0.730201	0.741144	0.745807	0.72445	0.729659	0.720214	0.725807	0.722733	0.734584	0.725641	0.758003	0.75032	0.749679	0.777349	0.738579	0.743003	0.741026	0.739796	0.710526	0.732283	0.733333	0.731707	0.746667	0.752294	0.759732	0.741036	0.762533	0.725131	0.743624	0.725131	0.718085	0.743692	0.751643	0.744311	0.738836	0.728745	0.748948	0.724796	0.749326	0.745578	0.740136	0.702098	0.724796	0.702929
0.6037736	0.664697	0.704708	0.714086	0.697013	0.677233	0.734525	0.723464	0.742404	0.717881	0.741935	0.735254	0.710744	0.726783	0.725275	0.727034	0.736566	0.741809	0.754271	0.756258	0.742857	0.739583	0.750656	0.736292	0.722372	0.731183	0.737705	0.736111	0.743169	0.759732	0.759285	0.715646	0.756757	0.739946	0.751032	0.729222	0.724796	0.753741	0.756393	0.754458	0.740638	0.721992	0.765468	0.726257	0.762431	0.775453	0.764296	0.723099	0.740224	0.729614
0.6091052	0.657817	0.700855	0.682451	0.693182	0.68777	0.730769	0.747559	0.738786	0.722222	0.732886	0.723288	0.723521	0.731183	0.710562	0.72346	0.751309	0.746073	0.779528	0.763158	0.728923	0.736021	0.747051	0.753585	0.713324	0.716778	0.720327	0.74896	0.750341	0.745308	0.741758	0.736413	0.750337	0.730924	0.758242	0.728246	0.721088	0.73913	0.739247	0.739726	0.731302	0.70442	0.721264	0.728034	0.733793	0.754875	0.752089	0.713467	0.728034	0.731429
0.5873494	0.652482	0.696845	0.668456	0.662107	0.66205	0.696689	0.709677	0.710828	0.717752	0.712435	0.73712	0.729443	0.715953	0.706349	0.713924	0.723135	0.725664	0.722433	0.721728	0.726817	0.731156	0.736709	0.760705	0.722078	0.722798	0.726316	0.71123	0.694737	0.727038	0.712583	0.715596	0.710938	0.715762	0.717881	0.73385	0.703412	0.726081	0.721141	0.72391	0.691589	0.700399	0.70816	0.677419	0.720745	0.738255	0.74094	0.73931	0.733871	0.718019
0.6170543	0.653061	0.690141	0.69146	0.707865	0.677098	0.717391	0.711724	0.733681	0.704188	0.730412	0.745258	0.721088	0.718085	0.705563	0.718547	0.725389	0.740933	0.737662	0.744792	0.716303	0.718147	0.734112	0.743226	0.729694	0.727756	0.709852	0.729767	0.717949	0.713528	0.722826	0.709677	0.726302	0.712583	0.736413	0.741722	0.713324	0.728495	0.731383	0.737127	0.717808	0.710383	0.71875	0.714483	0.717599	0.732782	0.735537	0.719547	0.736552	0.69209
0.6094946	0.665706	0.707521	0.702997	0.7	0.677918	0.717742	0.723056	0.744186	0.715026	0.720105	0.705094	0.716016	0.710526	0.70604	0.703466	0.715385	0.728205	0.719794	0.716495	0.714104	0.721019	0.731707	0.712644	0.690382	0.735874	0.731642	0.735414	0.723631	0.742782	0.717742	0.707447	0.713342	0.726081	0.717742	0.712975	0.708389	0.734043	0.726316	0.72118	0.696477	0.716216	0.733146	0.709413	0.709852	0.724796	0.724796	0.70028	0.71487	0.717877
0.6006098	0.648493	0.715673	0.697422	0.710927	0.677871	0.730924	0.720109	0.749035	0.740645	0.722513	0.726302	0.742627	0.739187	0.716577	0.731458	0.743295	0.763729	0.752881	0.752247	0.741772	0.746193	0.744246	0.753181	0.742782	0.735602	0.75266	0.732432	0.731383	0.734641	0.730924	0.728477	0.747368	0.751958	0.749665	0.749347	0.724138	0.749669	0.757536	0.744993	0.720648	0.729475	0.724476	0.720109	0.72043	0.743555	0.740841	0.70014	0.725544	0.734353
0.6120556	0.651163	0.702247	0.730769	0.70028	0.680851	0.710027	0.731774	0.729167	0.725849	0.736424	0.732432	0.724559	0.729443	0.746955	0.72445	0.744186	0.736434	0.753886	0.766234	0.732394	0.736842	0.752911	0.720721	0.714475	0.74702	0.742934	0.738714	0.726783	0.767196	0.747968	0.72118	0.758988	0.745046	0.769648	0.745046	0.735571	0.756032	0.758621	0.762162	0.737705	0.741144	0.747875	0.723521	0.75102	0.744506	0.730769	0.69209	0.712517	0.712676
0.6053042	0.659824	0.713881	0.692521	0.69774	0.672389	0.726776	0.718447	0.745407	0.728947	0.728972	0.716621	0.722298	0.721925	0.703956	0.717079	0.729167	0.742188	0.72846	0.751309	0.732903	0.711514	0.750978	0.718547	0.722892	0.728972	0.7327	0.72	0.748982	0.738667	0.724044	0.716216	0.735571	0.721704	0.737705	0.713715	0.700947	0.727027	0.729947	0.730245	0.702479	0.70055	0.714286	0.710125	0.705075	0.728532	0.739612	0.68661	0.718447	0.704546
0.6151468	0.642442	0.716292	0.70055	0.691877	0.675177	0.715447	0.729023	0.744792	0.718016	0.709934	0.721622	0.719132	0.734748	0.722598	0.721863	0.728682	0.736434	0.748705	0.742857	0.742638	0.73941	0.747736	0.733591	0.7251	0.741722	0.726783	0.733242	0.734859	0.759259	0.742547	0.715818	0.745672	0.745046	0.745258	0.739762	0.700671	0.734584	0.742706	0.735135	0.713115	0.724796	0.739377	0.737277	0.729252	0.758242	0.752747	0.70904	0.712517	0.729577
0.5975232	0.652111	0.694796	0.707015	0.715287	0.676136	0.716418	0.732782	0.761408	0.737255	0.740053	0.730717	0.725544	0.730412	0.707317	0.720207	0.727038	0.739974	0.734112	0.751625	0.735897	0.724936	0.740933	0.716495	0.718085	0.729443	0.749326	0.717808	0.749326	0.757616	0.740841	0.732886	0.762667	0.740741	0.751696	0.738095	0.706989	0.738255	0.735724	0.744249	0.705882	0.723056	0.731915	0.727273	0.722071	0.753783	0.740027	0.701556	0.713499	0.705219
0.5939394	0.647646	0.706207	0.709852	0.707015	0.674095	0.721704	0.732432	0.755442	0.724005	0.739583	0.717132	0.693333	0.719687	0.707447	0.732824	0.734435	0.729352	0.728662	0.758621	0.740554	0.714646	0.737913	0.726582	0.70235	0.742188	0.748677	0.733871	0.756614	0.764629	0.737683	0.724638	0.76178	0.742857	0.753662	0.735065	0.707124	0.732543	0.735332	0.741036	0.719463	0.712182	0.731572	0.718919	0.716577	0.758435	0.739541	0.712899	0.708108	0.710927
0.5916399	0.633484	0.689956	0.705548	0.702467	0.670588	0.709677	0.720798	0.732167	0.728745	0.723288	0.710489	0.702247	0.707819	0.691877	0.705882	0.712951	0.726302	0.725569	0.743624	0.724868	0.700265	0.727273	0.718085	0.70055	0.720548	0.721449	0.716714	0.746518	0.735978	0.715287	0.712899	0.724518	0.73224	0.723703	0.718579	0.680556	0.715673	0.72428	0.732867	0.695898	0.693935	0.716593	0.695157	0.709859	0.739687	0.736842	0.691069	0.703704	0.70073
0.6209048	0.648094	0.719547	0.703601	0.69774	0.695279	0.715847	0.726768	0.748031	0.731579	0.726302	0.719346	0.725034	0.73262	0.723056	0.735332	0.739583	0.755208	0.746736	0.756544	0.756129	0.742561	0.756193	0.741894	0.720214	0.750334	0.743555	0.747586	0.751696	0.762667	0.737705	0.732432	0.754362	0.764314	0.76776	0.73502	0.711773	0.740541	0.754011	0.746594	0.735537	0.725275	0.74	0.732316	0.729767	0.772853	0.750692	0.698006	0.699029	0.732954
0.5965463	0.643068	0.698006	0.682451	0.713068	0.667626	0.722527	0.714086	0.738786	0.727513	0.74094	0.712329	0.729023	0.715054	0.699588	0.712975	0.730367	0.732984	0.750656	0.744737	0.734112	0.720416	0.741809	0.73794	0.7214	0.730201	0.725784	0.732316	0.755798	0.747989	0.739011	0.711956	0.744939	0.736278	0.752747	0.725569	0.69932	0.73913	0.733871	0.734247	0.720222	0.701658	0.712644	0.69735	0.711724	0.754875	0.746518	0.704871	0.716876	0.722857
0.5863708	0.64881	0.695402	0.676966	0.69341	0.679245	0.684211	0.697609	0.720745	0.722667	0.717185	0.740332	0.710125	0.696477	0.680498	0.681638	0.707124	0.717678	0.708995	0.718833	0.695425	0.694627	0.721268	0.706964	0.716418	0.719892	0.72077	0.704895	0.718019	0.727027	0.720222	0.715068	0.734694	0.720648	0.722992	0.726046	0.691358	0.70411	0.720867	0.723757	0.701117	0.704735	0.710145	0.68917	0.687065	0.719101	0.710674	0.702312	0.700422	0.685879
0.6066351	0.652819	0.710602	0.694678	0.694286	0.691751	0.698895	0.715287	0.71618	0.734043	0.723347	0.719008	0.727524	0.7	0.692414	0.693017	0.707895	0.710526	0.704485	0.71164	0.701434	0.69281	0.724638	0.710354	0.709066	0.712551	0.713306	0.702929	0.699588	0.714286	0.690608	0.691257	0.713704	0.7214	0.732044	0.718708	0.70041	0.702186	0.713514	0.69697	0.682451	0.694444	0.696532	0.698457	0.67129	0.711485	0.719888	0.688761	0.720898	0.718391
0.6019108	0.660688	0.692641	0.682652	0.699281	0.664723	0.717663	0.69774	0.712951	0.712182	0.720109	0.710125	0.704735	0.707483	0.672222	0.708223	0.712583	0.717881	0.730412	0.721704	0.713911	0.7	0.721485	0.71504	0.708447	0.722826	0.69337	0.724719	0.718232	0.719132	0.698192	0.696011	0.724044	0.715447	0.714882	0.696477	0.68595	0.704264	0.712925	0.726768	0.678822	0.685315	0.678311	0.69774	0.675978	0.724965	0.713681	0.679245	0.717514	0.706223
0.6227929	0.674699	0.706395	0.698864	0.704348	0.696035	0.722689	0.725462	0.723118	0.716981	0.71409	0.701117	0.701262	0.70411	0.693706	0.6996	0.730667	0.714667	0.719251	0.729222	0.721268	0.709934	0.723631	0.698539	0.705075	0.71409	0.709318	0.721358	0.72879	0.721311	0.72549	0.720222	0.740027	0.71487	0.72549	0.701228	0.701803	0.706371	0.712329	0.698324	0.689265	0.707042	0.706745	0.722617	0.68917	0.724432	0.713068	0.669591	0.705548	0.702624
0.6012658	0.662704	0.691535	0.706872	0.709585	0.678261	0.70816	0.730337	0.7251	0.729694	0.727027	0.717241	0.714681	0.703654	0.70442	0.720317	0.716732	0.732543	0.726552	0.736424	0.720627	0.71466	0.730871	0.716535	0.710027	0.72973	0.728022	0.72905	0.725275	0.74224	0.735823	0.738714	0.73913	0.74124	0.733057	0.733154	0.70411	0.738714	0.744249	0.733793	0.702929	0.703755	0.720695	0.716292	0.719444	0.734923	0.720898	0.683983	0.699438	0.693525
0.6022544	0.667674	0.702624	0.712251	0.723837	0.683358	0.707865	0.721826	0.74124	0.737838	0.740741	0.705882	0.711674	0.703297	0.709677	0.712182	0.721925	0.719251	0.731904	0.728495	0.717881	0.698539	0.725569	0.703063	0.707015	0.716049	0.711297	0.731915	0.74477	0.734247	0.730337	0.727778	0.744828	0.716826	0.72191	0.719562	0.675939	0.708333	0.730769	0.722689	0.694051	0.70904	0.723529	0.718973	0.71086	0.74359	0.712251	0.674487	0.699001	0.681287
0.6158631	0.663743	0.717514	0.712707	0.721127	0.687589	0.730245	0.733057	0.743456	0.732283	0.727031	0.725544	0.717599	0.722667	0.715646	0.725618	0.74026	0.74026	0.752604	0.75718	0.746461	0.732903	0.738622	0.729625	0.734312	0.729694	0.73613	0.731774	0.746955	0.763298	0.743869	0.727763	0.763052	0.73838	0.73297	0.735724	0.709852	0.733154	0.736	0.741848	0.71978	0.712329	0.712251	0.716459	0.71409	0.751381	0.734807	0.707386	0.70816	0.708215
0.6173633	0.660633	0.713246	0.691323	0.70537	0.685294	0.704067	0.717949	0.734859	0.717949	0.734247	0.707692	0.716292	0.705075	0.697479	0.697861	0.723631	0.726302	0.709505	0.724832	0.714286	0.710875	0.729947	0.702128	0.706044	0.731507	0.715877	0.728045	0.713092	0.738714	0.723703	0.701803	0.732782	0.751366	0.720898	0.721311	0.683333	0.710125	0.716049	0.724476	0.690241	0.705219	0.722467	0.723647	0.695775	0.739687	0.708393	0.691069	0.698006	0.70365
0.6153846	0.641104	0.701183	0.693642	0.702065	0.681614	0.703704	0.720695	0.729508	0.715068	0.706537	0.698864	0.699001	0.693593	0.699858	0.697422	0.712737	0.726287	0.722826	0.73842	0.724832	0.713324	0.716418	0.707152	0.69735	0.720445	0.7157	0.713669	0.721358	0.722222	0.729345	0.721127	0.746853	0.73509	0.717949	0.704577	0.691114	0.723944	0.72702	0.710227	0.706897	0.702006	0.704478	0.700434	0.706724	0.710983	0.693642	0.6875	0.674385	0.670623
0.5961538	0.646617	0.70537	0.692199	0.720695	0.70088	0.724476	0.715909	0.735571	0.7214	0.729508	0.702929	0.70028	0.71409	0.703911	0.698667	0.713715	0.732357	0.723631	0.725569	0.725594	0.716931	0.706667	0.697613	0.712329	0.704918	0.711111	0.700565	0.738889	0.739427	0.716084	0.70816	0.725275	0.713897	0.704895	0.702997	0.6759	0.716459	0.725034	0.714086	0.70804	0.68917	0.702782	0.713068	0.719101	0.740425	0.714894	0.686131	0.698864	0.695779
0.6188198	0.658683	0.696532	0.683616	0.706052	0.677372	0.690808	0.712871	0.721925	0.702413	0.721088	0.711111	0.708508	0.722071	0.7121	0.717132	0.724138	0.721485	0.726064	0.722667	0.712221	0.711462	0.711819	0.715984	0.712142	0.731973	0.719225	0.720113	0.724758	0.728261	0.713092	0.69697	0.716826	0.716418	0.713092	0.721845	0.695172	0.721763	0.722071	0.719444	0.702247	0.689076	0.690962	0.695898	0.710489	0.720339	0.70339	0.677326	0.684583	0.689855
0.5964912	0.667665	0.684971	0.683616	0.674352	0.686131	0.704735	0.695898	0.708556	0.713137	0.712925	0.705556	0.708508	0.708447	0.698192	0.706507	0.726791	0.724138	0.720745	0.733333	0.717477	0.700922	0.717132	0.721268	0.712142	0.718367	0.721992	0.714487	0.713693	0.720109	0.718663	0.707989	0.71409	0.713704	0.713092	0.700136	0.692414	0.713499	0.730245	0.722222	0.702247	0.714286	0.699708	0.695898	0.690909	0.711864	0.69774	0.68314	0.712871	0.684058
0.5890183	0.64486	0.681682	0.668622	0.673653	0.667678	0.693642	0.696035	0.686981	0.691667	0.691114	0.70317	0.694645	0.694915	0.686869	0.674003	0.708791	0.703297	0.688705	0.701658	0.691156	0.690314	0.696011	0.719562	0.698727	0.682652	0.680057	0.686131	0.694405	0.707042	0.687861	0.685714	0.700709	0.703235	0.682081	0.691983	0.692418	0.7	0.70339	0.697406	0.685131	0.686047	0.666667	0.660793	0.676342	0.703812	0.692082	0.716012	0.701909	0.680723
0.5222025	0.562914	0.56051	0.565217	0.571429	0.563607	0.59633	0.572317	0.581871	0.583578	0.5693	0.585366	0.600306	0.6	0.580153	0.574746	0.588406	0.57971	0.575581	0.588921	0.56528	0.569784	0.56894	0.588745	0.57997	0.57228	0.570562	0.590417	0.582701	0.568452	0.562691	0.546828	0.584708	0.57058	0.602446	0.579495	0.590015	0.598187	0.58806	0.594512	0.570988	0.575385	0.565916	0.578538	0.565284	0.580745	0.590062	0.573718	0.59409	0.57508
0.5306799	0.583851	0.598802	0.584795	0.60597	0.577912	0.596542	0.58858	0.61326	0.612188	0.604782	0.612069	0.611833	0.614085	0.598561	0.600823	0.619178	0.619178	0.596154	0.614325	0.580733	0.598639	0.589849	0.611187	0.617772	0.610408	0.60372	0.60262	0.592275	0.587079	0.59366	0.578348	0.602546	0.614306	0.62536	0.625526	0.619116	0.632479	0.628169	0.612069	0.598837	0.611594	0.598187	0.600293	0.590449	0.605263	0.611111	0.611446	0.609078	0.600601
0.5315615	0.59409	0.578711	0.58858	0.618834	0.590909	0.608947	0.58651	0.600277	0.60749	0.6	0.592806	0.601156	0.598025	0.596542	0.596154	0.600823	0.595336	0.588721	0.612414	0.595109	0.588556	0.596154	0.592896	0.59887	0.605634	0.60745	0.618076	0.595989	0.590717	0.588745	0.573466	0.603399	0.601124	0.608947	0.601124	0.614286	0.619116	0.617772	0.621583	0.596798	0.592163	0.599092	0.59824	0.608696	0.585651	0.597365	0.576169	0.58651	0.598496
0.5320197	0.606154	0.605341	0.591304	0.62426	0.575712	0.602857	0.583454	0.616438	0.60989	0.608089	0.603989	0.618026	0.606145	0.60485	0.593197	0.605978	0.592391	0.59673	0.601093	0.600269	0.591093	0.595918	0.606225	0.612587	0.596932	0.604255	0.611833	0.601418	0.5961	0.585714	0.587571	0.611501	0.589708	0.614286	0.617524	0.619519	0.618644	0.622905	0.615385	0.605187	0.600575	0.598802	0.600871	0.599713	0.605797	0.597101	0.591045	0.603774	0.610119
0.5466238	0.600302	0.608442	0.605974	0.615385	0.588235	0.625526	0.62963	0.624495	0.626181	0.638356	0.646154	0.634831	0.650206	0.64986	0.614973	0.635514	0.614152	0.629183	0.636242	0.62963	0.636605	0.628342	0.638298	0.64011	0.613699	0.635097	0.620397	0.604457	0.621067	0.622721	0.601942	0.639119	0.636612	0.639551	0.647541	0.627778	0.638003	0.652949	0.648951	0.61669	0.631876	0.619677	0.623932	0.614085	0.611664	0.625889	0.626647	0.621083	0.618978
0.5493421	0.582434	0.58841	0.600871	0.601482	0.576577	0.597997	0.593023	0.611797	0.616231	0.611732	0.619116	0.621776	0.615385	0.628571	0.585831	0.593197	0.606803	0.594816	0.615595	0.576819	0.591892	0.599455	0.601626	0.610644	0.600559	0.613636	0.609827	0.59375	0.588564	0.60372	0.585573	0.61236	0.593315	0.615165	0.615599	0.609065	0.613861	0.626573	0.627675	0.600289	0.615827	0.596702	0.593023	0.597701	0.58926	0.603774	0.58296	0.616279	0.593145
0.5288462	0.586466	0.583454	0.587234	0.599132	0.571847	0.612587	0.607954	0.622819	0.627187	0.603825	0.619247	0.630252	0.640219	0.625698	0.613333	0.625832	0.609854	0.616822	0.626506	0.598945	0.608466	0.605333	0.618037	0.627397	0.606557	0.588889	0.612994	0.602778	0.60573	0.598601	0.59751	0.631868	0.607629	0.634965	0.623978	0.609418	0.630705	0.632011	0.641562	0.609309	0.599156	0.600293	0.616477	0.606742	0.609929	0.632624	0.592701	0.625	0.605531
0.5308057	0.599406	0.587393	0.593838	0.605714	0.587554	0.61326	0.611501	0.623342	0.638298	0.615385	0.619835	0.630705	0.635135	0.631724	0.624506	0.636842	0.628947	0.62533	0.640212	0.61017	0.622222	0.608696	0.626474	0.633288	0.618084	0.611797	0.613668	0.617284	0.61186	0.607735	0.614754	0.632293	0.611036	0.638122	0.627187	0.615595	0.622951	0.648649	0.641873	0.618384	0.613889	0.604046	0.608696	0.60749	0.619048	0.621849	0.596542	0.625526	0.606322
0.5264848	0.581325	0.598837	0.596591	0.602899	0.572687	0.596639	0.608819	0.620968	0.630728	0.621067	0.611732	0.622721	0.6	0.632168	0.611482	0.624	0.610667	0.609626	0.619303	0.589168	0.601325	0.606141	0.616202	0.628258	0.623803	0.617524	0.613861	0.600835	0.606557	0.602241	0.603878	0.635488	0.597544	0.627451	0.622101	0.60749	0.628809	0.635616	0.650838	0.607345	0.608451	0.612903	0.617354	0.62166	0.627841	0.616477	0.605263	0.614509	0.620991
0.5515055	0.598214	0.600575	0.598315	0.621776	0.58926	0.614958	0.616034	0.62766	0.634667	0.630582	0.635359	0.632455	0.623306	0.630705	0.623514	0.622691	0.627968	0.624339	0.636605	0.60915	0.621232	0.620872	0.633377	0.635007	0.608931	0.61348	0.629371	0.602476	0.618919	0.617729	0.605479	0.642177	0.615385	0.631579	0.615385	0.617284	0.649315	0.634146	0.649171	0.617318	0.610028	0.611594	0.616034	0.617524	0.61236	0.623595	0.598266	0.638537	0.613833
0.5241810	0.601173	0.600567	0.603878	0.596045	0.586552	0.636612	0.610263	0.632546	0.636842	0.635514	0.637602	0.653899	0.620321	0.638472	0.63103	0.630208	0.630208	0.613577	0.625655	0.609032	0.615783	0.617992	0.622568	0.626506	0.622163	0.632293	0.631724	0.616011	0.629333	0.612022	0.62973	0.641611	0.636485	0.63388	0.628495	0.608931	0.645946	0.647059	0.645777	0.61708	0.629121	0.611429	0.624133	0.622771	0.637119	0.648199	0.632479	0.632455	0.636364
0.5451713	0.58858	0.608204	0.59751	0.61213	0.591429	0.630286	0.603878	0.642202	0.638633	0.629333	0.636735	0.642077	0.627503	0.637602	0.627604	0.63199	0.639792	0.633637	0.637908	0.608247	0.633075	0.619792	0.629534	0.636364	0.632	0.644986	0.630854	0.615176	0.596538	0.608458	0.618084	0.630027	0.625	0.654843	0.625	0.632432	0.647773	0.651535	0.655782	0.629986	0.641975	0.633381	0.626039	0.627397	0.622407	0.636238	0.617354	0.634349	0.61844
0.5302326	0.600583	0.611268	0.61157	0.589888	0.594595	0.625	0.62069	0.639687	0.63089	0.632138	0.639566	0.661224	0.646277	0.648575	0.638132	0.642487	0.647668	0.651948	0.651042	0.616175	0.653797	0.638132	0.642581	0.647137	0.640106	0.626181	0.631001	0.618084	0.628647	0.616848	0.61828	0.638184	0.633113	0.668478	0.649007	0.635262	0.650538	0.659574	0.661247	0.638356	0.642077	0.630682	0.637241	0.62483	0.625344	0.641873	0.623229	0.628965	0.624294
0.5144695	0.600302	0.593886	0.594595	0.592163	0.588235	0.597476	0.592593	0.613728	0.623482	0.610959	0.629371	0.623595	0.620027	0.635854	0.604278	0.616822	0.616822	0.615796	0.622819	0.589947	0.61008	0.606952	0.603723	0.618132	0.610959	0.618384	0.611898	0.601671	0.610123	0.605891	0.610263	0.625344	0.614754	0.645161	0.628415	0.597222	0.626907	0.647462	0.637762	0.61669	0.623413	0.604993	0.606838	0.622535	0.603129	0.617354	0.609078	0.615385	0.610219
0.5215947	0.59098	0.587706	0.58858	0.603886	0.593939	0.603175	0.59824	0.611342	0.615811	0.622535	0.610072	0.621387	0.609309	0.616715	0.598901	0.622771	0.611797	0.616231	0.623448	0.578804	0.60218	0.604396	0.60929	0.621469	0.614085	0.60745	0.609329	0.60745	0.613221	0.611833	0.621969	0.623229	0.623595	0.643579	0.629213	0.605714	0.619116	0.64598	0.635971	0.608442	0.595065	0.596067	0.604106	0.608696	0.600293	0.606149	0.591252	0.612903	0.634587
0.5031847	0.559043	0.571429	0.5811	0.601439	0.562682	0.614743	0.59322	0.611482	0.618474	0.603261	0.613037	0.629526	0.62585	0.616667	0.61008	0.625166	0.617219	0.613546	0.631158	0.593176	0.607895	0.586207	0.609499	0.607629	0.61413	0.599448	0.615169	0.616022	0.602442	0.595271	0.61348	0.620219	0.601626	0.631432	0.617886	0.606061	0.638239	0.636735	0.638003	0.611501	0.612587	0.605531	0.618644	0.622905	0.595205	0.606488	0.597968	0.624294	0.616498
0.5211726	0.574046	0.568483	0.578417	0.572687	0.550595	0.590071	0.579251	0.606803	0.608458	0.584488	0.596888	0.607954	0.599168	0.594901	0.602703	0.612686	0.609986	0.611637	0.610583	0.580214	0.595174	0.594595	0.610215	0.619444	0.609418	0.602817	0.610315	0.605634	0.586445	0.592908	0.59467	0.615599	0.585635	0.632624	0.610497	0.615169	0.633941	0.638003	0.639321	0.612303	0.607703	0.597325	0.596542	0.626781	0.610072	0.621583	0.592593	0.636888	0.611521
0.5007825	0.567647	0.571023	0.572222	0.586402	0.559541	0.591781	0.595271	0.610526	0.612137	0.599732	0.60929	0.622771	0.597855	0.607387	0.598693	0.613577	0.608355	0.602094	0.606299	0.584735	0.586252	0.59085	0.611183	0.606711	0.60241	0.595918	0.616874	0.60136	0.598931	0.605479	0.604336	0.632571	0.606141	0.635616	0.619493	0.610583	0.620596	0.632708	0.617486	0.624309	0.603306	0.595989	0.59249	0.607978	0.613889	0.622222	0.608571	0.639777	0.615385
0.5249597	0.574018	0.57726	0.578348	0.581395	0.568483	0.598315	0.593438	0.61186	0.605405	0.600823	0.616247	0.610408	0.598901	0.605891	0.607764	0.614973	0.612299	0.61126	0.61828	0.58543	0.61089	0.599732	0.620506	0.596974	0.622771	0.627615	0.607092	0.599721	0.60274	0.598315	0.602778	0.623448	0.601915	0.640449	0.618331	0.609179	0.633333	0.634615	0.635854	0.628895	0.615819	0.611765	0.599144	0.609309	0.592593	0.618234	0.615836	0.624822	0.599415
0.5381026	0.570175	0.581921	0.59116	0.6	0.556348	0.604905	0.603043	0.623037	0.624672	0.612517	0.625	0.611187	0.613333	0.617687	0.595579	0.623377	0.61039	0.598958	0.626632	0.592021	0.611613	0.592978	0.613195	0.608812	0.620506	0.635995	0.618982	0.608931	0.617021	0.613079	0.606469	0.64257	0.626826	0.634877	0.640106	0.634278	0.638814	0.650667	0.641304	0.631868	0.635616	0.626781	0.611342	0.604651	0.604972	0.624309	0.619318	0.630705	0.614731
0.5288462	0.580451	0.597968	0.598582	0.613603	0.57478	0.598601	0.605114	0.628188	0.627187	0.60929	0.630405	0.633053	0.623803	0.625698	0.610667	0.628495	0.636485	0.627503	0.629183	0.609499	0.621693	0.6	0.62069	0.619178	0.614754	0.630556	0.624294	0.611111	0.611187	0.615385	0.614108	0.634615	0.615804	0.643357	0.632153	0.617729	0.644537	0.645691	0.638773	0.623413	0.627286	0.626647	0.622159	0.623595	0.612766	0.62695	0.60438	0.642046	0.614265
0.5111111	0.57228	0.564029	0.571027	0.585366	0.555233	0.57975	0.571831	0.60719	0.614152	0.604336	0.591978	0.608333	0.588874	0.590028	0.587302	0.60502	0.599736	0.588079	0.59761	0.575916	0.582677	0.584656	0.592105	0.589674	0.585366	0.592287	0.59944	0.584022	0.584574	0.582524	0.578875	0.618529	0.589189	0.618585	0.597297	0.607143	0.60631	0.605156	0.605809	0.59021	0.594142	0.583454	0.566197	0.576602	0.585091	0.599156	0.599132	0.619718	0.591631
0.5031056	0.578102	0.5811	0.595862	0.596343	0.578348	0.598639	0.604972	0.619608	0.634338	0.62766	0.613297	0.637602	0.623169	0.633152	0.61039	0.625162	0.622568	0.613784	0.615385	0.604113	0.608247	0.615584	0.617571	0.621333	0.606383	0.616216	0.601648	0.608108	0.61089	0.604082	0.613728	0.620321	0.623342	0.628571	0.636605	0.606469	0.629879	0.639148	0.629579	0.595336	0.601915	0.59175	0.599448	0.592896	0.601379	0.609655	0.61844	0.624309	0.622348
0.5182830	0.576119	0.579251	0.583099	0.589081	0.590975	0.597222	0.600846	0.618667	0.617647	0.610583	0.614958	0.620306	0.619565	0.613037	0.614569	0.624339	0.621693	0.628647	0.62766	0.602883	0.61498	0.601325	0.613966	0.612245	0.626866	0.606897	0.614306	0.609655	0.593496	0.594444	0.607143	0.619372	0.625169	0.641667	0.627876	0.621733	0.629121	0.646739	0.639889	0.610644	0.622905	0.616279	0.61213	0.627615	0.616901	0.633803	0.62029	0.609309	0.606936
0.5038640	0.56686	0.581461	0.585165	0.571429	0.564539	0.593496	0.583219	0.596354	0.610966	0.593378	0.610811	0.610583	0.612732	0.611637	0.600259	0.612403	0.599483	0.598446	0.605195	0.583867	0.61104	0.608021	0.620335	0.584329	0.601325	0.600269	0.582763	0.581427	0.582011	0.569106	0.581769	0.593875	0.612946	0.615176	0.628798	0.595973	0.600536	0.625995	0.610811	0.592896	0.591281	0.597734	0.594223	0.604082	0.576923	0.601648	0.596045	0.618982	0.597183
0.5032258	0.565809	0.586861	0.582026	0.590975	0.581121	0.571027	0.594286	0.601889	0.61705	0.598901	0.591865	0.608451	0.610729	0.603933	0.595174	0.613119	0.605087	0.614765	0.624495	0.588859	0.601064	0.603217	0.613333	0.619835	0.620879	0.608939	0.605114	0.594972	0.600823	0.596343	0.598053	0.616022	0.608219	0.635724	0.619178	0.601671	0.625869	0.624484	0.628331	0.607092	0.613861	0.603829	0.614286	0.60452	0.60485	0.613409	0.602056	0.605714	0.614934
0.5280000	0.600601	0.611594	0.611898	0.606936	0.594436	0.611732	0.621277	0.630027	0.634409	0.613915	0.615599	0.632168	0.622951	0.627615	0.620506	0.635638	0.630319	0.629333	0.647059	0.598155	0.620872	0.612517	0.619868	0.632011	0.643929	0.621359	0.626234	0.604716	0.618529	0.611732	0.624309	0.636488	0.609524	0.650838	0.634014	0.622407	0.627072	0.661202	0.640668	0.614085	0.617977	0.616959	0.62695	0.622721	0.606232	0.626062	0.618076	0.635461	0.633721
0.5378422	0.589124	0.58309	0.592593	0.604651	0.57732	0.592697	0.596291	0.606469	0.613514	0.595336	0.602241	0.618847	0.618132	0.619916	0.594378	0.620321	0.614973	0.603217	0.623656	0.601325	0.605578	0.607764	0.612517	0.610729	0.614541	0.6053	0.612766	0.60251	0.6	0.603933	0.613889	0.631724	0.604651	0.629213	0.621067	0.600835	0.627778	0.645604	0.62465	0.609065	0.59322	0.594118	0.613409	0.595205	0.603989	0.618234	0.607038	0.619116	0.628655
0.5207668	0.581709	0.575977	0.588402	0.594517	0.564327	0.608089	0.606232	0.618474	0.625503	0.607629	0.614743	0.622905	0.597544	0.626741	0.603723	0.626826	0.62417	0.623169	0.627503	0.605263	0.604222	0.619681	0.619048	0.625683	0.632153	0.626039	0.614085	0.606648	0.604082	0.6053	0.606897	0.643836	0.608696	0.641562	0.625	0.616022	0.631724	0.654843	0.634214	0.632911	0.625526	0.621898	0.594901	0.605042	0.61669	0.625177	0.614265	0.620397	0.62119
0.5217391	0.592701	0.609309	0.617931	0.616034	0.598291	0.609524	0.624309	0.637908	0.647444	0.62766	0.632293	0.626703	0.617843	0.627717	0.628571	0.625162	0.63035	0.63199	0.638853	0.614396	0.618557	0.633766	0.617571	0.616	0.617021	0.62973	0.607143	0.597297	0.62417	0.60136	0.619112	0.644385	0.61008	0.653061	0.625995	0.606469	0.632571	0.647137	0.635007	0.625514	0.623803	0.623044	0.60221	0.60929	0.601379	0.626207	0.621277	0.638122	0.611032
0.5141066	0.580265	0.611664	0.617524	0.609929	0.591954	0.592593	0.618384	0.632411	0.652576	0.619303	0.637483	0.64011	0.644295	0.627397	0.636126	0.643137	0.643137	0.642202	0.649146	0.624352	0.636364	0.628272	0.622396	0.63172	0.627346	0.632153	0.606648	0.618529	0.607764	0.614541	0.624152	0.633423	0.620321	0.641975	0.644385	0.619565	0.632293	0.657718	0.626539	0.625173	0.617931	0.61693	0.615599	0.619835	0.609179	0.634214	0.620887	0.640668	0.624822
0.5214626	0.567164	0.605187	0.611268	0.609195	0.57933	0.591667	0.609309	0.632	0.625668	0.613297	0.614958	0.606398	0.603261	0.621359	0.590728	0.616402	0.616402	0.615385	0.630319	0.589777	0.60184	0.596027	0.600791	0.620408	0.621438	0.615172	0.611501	0.601379	0.609756	0.611111	0.615385	0.6412	0.619756	0.636111	0.625169	0.610729	0.623626	0.654891	0.631579	0.621849	0.620112	0.616279	0.603667	0.616457	0.611268	0.614085	0.614493	0.626234	0.624278
0.5419968	0.574405	0.600575	0.598315	0.593123	0.574746	0.592798	0.599156	0.611702	0.629333	0.606225	0.610497	0.60749	0.604336	0.603043	0.589168	0.601583	0.598945	0.603175	0.612732	0.588235	0.600262	0.599736	0.607096	0.60787	0.606225	0.61348	0.612587	0.605227	0.610811	0.606648	0.616438	0.639456	0.59919	0.631579	0.626181	0.609054	0.627397	0.642276	0.621547	0.614525	0.629526	0.62029	0.59353	0.600835	0.615169	0.615169	0.632948	0.627286	0.613833
0.5096154	0.565414	0.58926	0.604255	0.590449	0.580645	0.593007	0.602273	0.601342	0.619112	0.598361	0.6053	0.610644	0.604651	0.592179	0.594667	0.596538	0.60719	0.611482	0.618474	0.596306	0.608466	0.602667	0.599469	0.60274	0.606557	0.619444	0.596045	0.594444	0.600273	0.598601	0.600277	0.645604	0.610354	0.626573	0.610354	0.606648	0.616874	0.648427	0.624826	0.61213	0.613221	0.606149	0.599432	0.603933	0.607092	0.62695	0.621898	0.613636	0.622999
0.5544554	0.581144	0.596125	0.608442	0.615156	0.575301	0.591105	0.61516	0.61348	0.62069	0.607843	0.618026	0.635058	0.617111	0.627507	0.592896	0.611187	0.60573	0.615595	0.625514	0.594595	0.598916	0.606557	0.605978	0.617977	0.613445	0.609687	0.617391	0.603989	0.606993	0.61406	0.61844	0.63662	0.606145	0.639885	0.622905	0.622159	0.632624	0.645161	0.629471	0.619392	0.623377	0.610526	0.61516	0.622478	0.620087	0.637555	0.62069	0.623907	0.639761
0.5394322	0.568889	0.589413	0.595804	0.599144	0.566474	0.604138	0.607843	0.61192	0.62417	0.603774	0.621733	0.61326	0.601889	0.614325	0.594737	0.609724	0.604468	0.619236	0.636724	0.585938	0.618799	0.610526	0.604712	0.621622	0.619946	0.610959	0.610028	0.60274	0.600269	0.601379	0.611187	0.634146	0.610215	0.626207	0.61828	0.617486	0.635744	0.645074	0.635488	0.617524	0.626907	0.623377	0.616247	0.623269	0.623776	0.629371	0.62446	0.635854	0.619799
0.5420561	0.579795	0.594059	0.614108	0.583921	0.562857	0.583902	0.603878	0.615989	0.622865	0.610667	0.609524	0.63388	0.622163	0.623978	0.609375	0.608583	0.608583	0.61017	0.619608	0.585051	0.609819	0.604167	0.61658	0.625668	0.608	0.607046	0.595041	0.596206	0.593875	0.603001	0.612686	0.613941	0.617021	0.646658	0.632979	0.616216	0.634278	0.648865	0.634014	0.599725	0.611797	0.601997	0.612188	0.627397	0.608575	0.630705	0.620199	0.628809	0.624113
0.5191083	0.565022	0.571429	0.600846	0.607194	0.571429	0.59249	0.59887	0.606141	0.621151	0.605978	0.604716	0.632312	0.612245	0.608333	0.594164	0.61192	0.601325	0.605578	0.61518	0.572179	0.597368	0.588859	0.601583	0.610354	0.611413	0.60221	0.615169	0.607735	0.599729	0.620306	0.605227	0.628415	0.615176	0.628651	0.626016	0.606061	0.618982	0.639456	0.635229	0.605891	0.606993	0.611354	0.61017	0.614525	0.609309	0.626234	0.618287	0.629943	0.639653
0.5437202	0.58209	0.579251	0.597183	0.603448	0.567686	0.583333	0.598025	0.602667	0.620321	0.591588	0.606648	0.625869	0.616848	0.610263	0.601325	0.608466	0.608466	0.607427	0.625	0.592398	0.61498	0.601325	0.606061	0.609524	0.605156	0.626207	0.603086	0.598621	0.604336	0.625	0.596154	0.638472	0.614344	0.627778	0.627876	0.607978	0.631868	0.649456	0.628809	0.616247	0.608939	0.604651	0.600846	0.6053	0.6	0.614085	0.614493	0.617772	0.615607
0.5241810	0.568915	0.580736	0.601108	0.59887	0.569385	0.601093	0.604716	0.616798	0.626316	0.606141	0.615804	0.623803	0.622995	0.627558	0.61017	0.627604	0.630208	0.629243	0.625655	0.593548	0.636481	0.615385	0.614786	0.615796	0.606141	0.629579	0.604138	0.594301	0.610667	0.625683	0.610811	0.644295	0.623169	0.642077	0.633822	0.606225	0.648649	0.663102	0.632153	0.625344	0.634615	0.628571	0.610263	0.614541	0.603878	0.620499	0.618234	0.624133	0.613636
0.5239617	0.569715	0.573083	0.596888	0.597403	0.570175	0.574616	0.589235	0.605087	0.612081	0.599455	0.606398	0.611732	0.608458	0.604457	0.590426	0.61089	0.608234	0.609854	0.619493	0.581579	0.604222	0.593085	0.600529	0.617486	0.607629	0.612188	0.616901	0.584488	0.598639	0.6053	0.593103	0.635616	0.597826	0.624826	0.619565	0.596685	0.609655	0.630286	0.631432	0.618847	0.622721	0.618978	0.606232	0.605042	0.591231	0.613861	0.608442	0.620397	0.583454
0.5165354	0.591716	0.6	0.606145	0.609687	0.565657	0.628099	0.629371	0.632275	0.6313	0.602961	0.615385	0.628965	0.606469	0.605227	0.599212	0.619423	0.614173	0.621053	0.633245	0.595579	0.617992	0.61498	0.611765	0.609986	0.608344	0.623803	0.611961	0.601915	0.604839	0.600551	0.610354	0.633288	0.604027	0.633609	0.61745	0.619372	0.629428	0.641509	0.637363	0.625	0.614958	0.599424	0.615385	0.600277	0.614525	0.620112	0.617816	0.632168	0.624642
0.5167464	0.57485	0.578035	0.587571	0.599424	0.548905	0.610028	0.596888	0.612299	0.608579	0.598639	0.597222	0.610879	0.599455	0.603616	0.608234	0.607427	0.61008	0.611702	0.621333	0.596583	0.603426	0.59761	0.594452	0.600273	0.598639	0.603043	0.607595	0.57538	0.586956	0.587744	0.586777	0.626539	0.578019	0.615599	0.588874	0.601379	0.633609	0.613079	0.619444	0.606742	0.610644	0.597668	0.594059	0.59021	0.596045	0.596045	0.593023	0.61669	0.594203
0.5140962	0.571429	0.571856	0.581871	0.573134	0.550681	0.579251	0.585651	0.593923	0.595568	0.585091	0.594828	0.600289	0.597183	0.58705	0.592593	0.589041	0.60274	0.596154	0.608815	0.572592	0.604082	0.589849	0.578445	0.606488	0.601969	0.60372	0.582242	0.563662	0.58427	0.573487	0.586895	0.605375	0.586255	0.610951	0.580645	0.570613	0.603989	0.608451	0.617816	0.59593	0.6	0.592145	0.585651	0.587554	0.581871	0.596491	0.584337	0.617862	0.60961
0.5179153	0.574046	0.589102	0.595684	0.587372	0.559524	0.58156	0.587896	0.60136	0.616644	0.590028	0.596888	0.613636	0.596394	0.594901	0.586487	0.593792	0.591093	0.584574	0.602442	0.564171	0.603217	0.586487	0.577957	0.597222	0.606648	0.605634	0.604584	0.583099	0.589212	0.604255	0.591865	0.612813	0.60221	0.624113	0.607735	0.592697	0.617111	0.621359	0.608204	0.606581	0.616263	0.612184	0.590778	0.598291	0.598561	0.615827	0.604444	0.613833	0.61743
0.5207297	0.57764	0.571856	0.576023	0.59403	0.544629	0.587896	0.582723	0.60221	0.617729	0.596343	0.603448	0.608947	0.594366	0.601439	0.584362	0.591781	0.586301	0.593407	0.606061	0.567164	0.598639	0.595336	0.597544	0.603667	0.618847	0.595136	0.599709	0.575107	0.589888	0.596542	0.586895	0.625177	0.605891	0.636888	0.608696	0.619116	0.621083	0.622535	0.600575	0.616279	0.611594	0.622356	0.591508	0.593343	0.605263	0.622807	0.61747	0.612006	0.60961
0.5232358	0.585209	0.597523	0.586103	0.598765	0.553991	0.58631	0.583964	0.603989	0.6	0.609579	0.599406	0.602086	0.584302	0.594354	0.5686	0.573446	0.581921	0.575071	0.59375	0.570629	0.58345	0.582744	0.571027	0.611354	0.592163	0.590842	0.601504	0.576071	0.588406	0.58631	0.576471	0.59854	0.590449	0.610119	0.596237	0.594993	0.626471	0.590116	0.596439	0.597598	0.583832	0.584375	0.580938	0.585949	0.613293	0.613293	0.613707	0.617247	0.624224
0.5342707	0.593443	0.583596	0.575385	0.566038	0.551834	0.578788	0.557781	0.57971	0.581395	0.570163	0.589124	0.603945	0.600592	0.605144	0.552518	0.557471	0.563218	0.559078	0.578035	0.560455	0.584879	0.578417	0.572246	0.601482	0.579025	0.601504	0.588055	0.559399	0.587021	0.551515	0.568862	0.573551	0.568483	0.584848	0.568483	0.578711	0.595808	0.588757	0.58006	0.584098	0.579268	0.582803	0.579353	0.578387	0.596923	0.603077	0.609524	0.613251	0.613924
0.5142857	0.569052	0.5568	0.561623	0.551834	0.524272	0.556068	0.55625	0.563877	0.580265	0.580838	0.584992	0.581538	0.581709	0.576687	0.553936	0.561863	0.558952	0.554744	0.568082	0.536023	0.569364	0.559767	0.571014	0.585586	0.577844	0.573171	0.590062	0.554878	0.573991	0.565284	0.555387	0.575301	0.573134	0.577573	0.58209	0.553191	0.570562	0.572714	0.584992	0.582946	0.574961	0.575121	0.590625	0.58642	0.580343	0.592824	0.605475	0.603125	0.59069
0.5105634	0.568145	0.565561	0.576271	0.588976	0.559105	0.573596	0.570988	0.577649	0.588064	0.579882	0.580938	0.604863	0.601482	0.59697	0.576369	0.581295	0.589928	0.585859	0.593343	0.569801	0.58	0.567723	0.587393	0.578635	0.585799	0.575301	0.58589	0.563253	0.570163	0.567527	0.557721	0.589286	0.578171	0.591806	0.575221	0.561562	0.590705	0.58963	0.596067	0.566616	0.567939	0.561404	0.570988	0.582317	0.59168	0.585516	0.597774	0.601852	0.59271
0.5286957	0.584416	0.575	0.573171	0.601246	0.562401	0.606607	0.577099	0.597701	0.608069	0.594436	0.598802	0.616541	0.609971	0.593703	0.584879	0.592593	0.598291	0.6	0.618911	0.589563	0.594059	0.596291	0.604255	0.590308	0.594436	0.608048	0.600911	0.587183	0.581871	0.591592	0.587537	0.597938	0.59562	0.618619	0.610219	0.576523	0.608309	0.618768	0.625749	0.59697	0.589124	0.589905	0.601527	0.582202	0.606707	0.579268	0.59434	0.613741	0.583072
0.5008818	0.565789	0.566456	0.564815	0.586751	0.5408	0.580547	0.562597	0.593023	0.594752	0.574815	0.578788	0.584475	0.593472	0.579666	0.571429	0.573487	0.590778	0.560694	0.585507	0.56776	0.569385	0.562771	0.571019	0.585438	0.586667	0.576169	0.599078	0.567119	0.571006	0.577508	0.567568	0.602086	0.590842	0.589666	0.59675	0.565414	0.591592	0.614243	0.59697	0.57362	0.568807	0.57508	0.587326	0.570992	0.57716	0.57716	0.601911	0.615147	0.593651
0.5483304	0.583607	0.580442	0.584615	0.597484	0.570973	0.578788	0.57319	0.591304	0.598837	0.590842	0.595166	0.600911	0.594675	0.596067	0.572662	0.591954	0.597701	0.59366	0.609827	0.5633	0.584879	0.57554	0.58083	0.583704	0.587888	0.586466	0.600306	0.577444	0.581121	0.593939	0.58982	0.594354	0.568483	0.593939	0.597938	0.584708	0.601796	0.609468	0.607251	0.571865	0.585366	0.592357	0.604006	0.572298	0.575385	0.587692	0.580952	0.594761	0.575949
0.5460637	0.583072	0.586103	0.584071	0.593373	0.583206	0.584302	0.576071	0.587744	0.608939	0.592908	0.597101	0.596798	0.588068	0.600871	0.57538	0.593923	0.593923	0.598338	0.619444	0.599179	0.595336	0.600277	0.588721	0.605974	0.607092	0.588745	0.60793	0.568543	0.589235	0.59593	0.58046	0.619116	0.579915	0.598837	0.596888	0.566906	0.591954	0.599432	0.608696	0.601173	0.599415	0.585366	0.59675	0.575183	0.584071	0.60472	0.592705	0.620384	0.59697
0.5263158	0.571429	0.571865	0.579105	0.579268	0.556414	0.591176	0.562033	0.591549	0.59887	0.571019	0.58651	0.594993	0.594828	0.593245	0.573427	0.586592	0.592179	0.582633	0.606742	0.564315	0.582524	0.584615	0.5758	0.58705	0.591105	0.581022	0.600297	0.583942	0.598854	0.582353	0.590116	0.585859	0.566524	0.588235	0.586552	0.558952	0.590116	0.603448	0.601173	0.581602	0.591716	0.58642	0.585949	0.573117	0.576119	0.58806	0.590769	0.612855	0.595092
0.5317726	0.58529	0.561086	0.565538	0.568421	0.548781	0.577649	0.557522	0.589708	0.599721	0.572238	0.58466	0.584302	0.578723	0.588406	0.577348	0.584828	0.593103	0.594744	0.613037	0.579235	0.586301	0.59116	0.587912	0.605114	0.600567	0.576369	0.592375	0.570605	0.579915	0.571843	0.593974	0.606838	0.550848	0.580551	0.573446	0.557471	0.579627	0.604255	0.607815	0.585651	0.589781	0.578387	0.581121	0.562682	0.57732	0.583211	0.579666	0.610619	0.586989
0.5384615	0.58529	0.570136	0.583211	0.580451	0.557927	0.577649	0.572271	0.586926	0.599721	0.580736	0.587554	0.590116	0.587234	0.608696	0.563536	0.598621	0.595862	0.583679	0.601942	0.579235	0.578082	0.582873	0.585165	0.590909	0.589235	0.590778	0.612903	0.590778	0.596888	0.606676	0.602583	0.606838	0.581921	0.595065	0.59322	0.577586	0.591105	0.601418	0.619392	0.58858	0.59562	0.584475	0.59587	0.588921	0.592047	0.597938	0.591806	0.60472	0.602118
0.5224626	0.576324	0.576577	0.577713	0.571856	0.558422	0.589595	0.563877	0.606648	0.605556	0.583921	0.59366	0.593343	0.573446	0.591631	0.580468	0.571429	0.596154	0.584022	0.60221	0.585034	0.581173	0.596974	0.599179	0.596888	0.603667	0.582496	0.586861	0.579627	0.571831	0.575144	0.585714	0.607092	0.562588	0.601156	0.579465	0.575107	0.588571	0.59887	0.59366	0.588921	0.572674	0.578788	0.575624	0.566038	0.583578	0.595308	0.595166	0.60793	0.587349
0.5481240	0.584098	0.59292	0.587896	0.608823	0.57228	0.599432	0.574315	0.604905	0.60929	0.601942	0.597734	0.603129	0.6	0.609929	0.581867	0.594595	0.610811	0.590786	0.608696	0.5917	0.58255	0.598105	0.589502	0.598053	0.615811	0.606488	0.602583	0.595205	0.581717	0.59375	0.58427	0.6053	0.586445	0.59375	0.603043	0.571027	0.592697	0.6	0.597734	0.595989	0.571429	0.5625	0.591631	0.564907	0.576369	0.590778	0.590504	0.626263	0.606509
0.5594406	0.584013	0.587127	0.588055	0.591549	0.580952	0.576169	0.579755	0.585859	0.599132	0.602941	0.592481	0.589124	0.592047	0.605422	0.550143	0.566524	0.58083	0.573888	0.595684	0.566572	0.565341	0.575931	0.578348	0.584071	0.588235	0.57485	0.594512	0.57485	0.575624	0.570136	0.5693	0.579882	0.56305	0.582202	0.583578	0.579105	0.5693	0.592047	0.595489	0.581431	0.570562	0.570523	0.579755	0.566667	0.58193	0.578867	0.587678	0.619632	0.601575
0.5617597	0.579114	0.588415	0.58631	0.583587	0.560863	0.58651	0.578241	0.598315	0.611268	0.592275	0.599415	0.599119	0.595989	0.600293	0.580195	0.582173	0.593315	0.589386	0.59944	0.590345	0.586445	0.599721	0.596394	0.599713	0.592275	0.60262	0.604444	0.590975	0.594286	0.59824	0.605797	0.607194	0.584879	0.59824	0.60485	0.577649	0.608696	0.595989	0.622807	0.609468	0.58997	0.587692	0.605067	0.586156	0.610119	0.60119	0.592024	0.625931	0.59633
0.5344262	0.592934	0.586667	0.590449	0.608567	0.580838	0.579173	0.588406	0.593707	0.620027	0.601671	0.58037	0.608571	0.60251	0.609687	0.581522	0.591588	0.60787	0.585034	0.608458	0.591398	0.58221	0.581522	0.586487	0.586592	0.598886	0.603399	0.608069	0.586402	0.595271	0.599144	0.592384	0.621849	0.597222	0.60485	0.597222	0.584746	0.614951	0.619247	0.620199	0.592806	0.593974	0.57997	0.594203	0.595989	0.602026	0.599132	0.599106	0.634783	0.603269
0.5207297	0.583851	0.583832	0.573099	0.59403	0.553706	0.576369	0.573939	0.593923	0.612188	0.585091	0.591954	0.606061	0.602817	0.598561	0.573388	0.59726	0.610959	0.590659	0.608815	0.588874	0.587755	0.59808	0.589359	0.609309	0.607595	0.595136	0.596798	0.572246	0.573034	0.587896	0.584046	0.611032	0.58906	0.59366	0.597476	0.590585	0.598291	0.616901	0.597701	0.587209	0.576812	0.598187	0.600293	0.590449	0.581871	0.599415	0.596386	0.609078	0.576577
0.5374593	0.58626	0.580265	0.58705	0.599119	0.556548	0.592908	0.587896	0.595918	0.622101	0.606648	0.596888	0.602273	0.604716	0.603399	0.591892	0.59919	0.607287	0.592693	0.613297	0.593583	0.587131	0.6	0.599462	0.594444	0.609418	0.605634	0.604584	0.583099	0.59751	0.590071	0.59467	0.618384	0.59116	0.598582	0.607735	0.58427	0.608696	0.60749	0.613861	0.606581	0.590585	0.594354	0.599424	0.589744	0.592806	0.592806	0.595556	0.622478	0.579025
0.5296053	0.57319	0.573551	0.58926	0.58963	0.567568	0.589413	0.584302	0.595336	0.605227	0.583799	0.573466	0.590258	0.584615	0.594286	0.577657	0.582313	0.595918	0.572988	0.596443	0.571429	0.572973	0.59673	0.574526	0.579832	0.589386	0.576704	0.595376	0.582386	0.574616	0.58083	0.577086	0.601124	0.562674	0.589413	0.584958	0.569405	0.591231	0.595804	0.610556	0.580087	0.581295	0.572714	0.575581	0.58046	0.577649	0.592163	0.594918	0.604651	0.590164
0.5329154	0.583211	0.583215	0.598053	0.598582	0.563218	0.600823	0.593315	0.613966	0.610304	0.58445	0.599179	0.601648	0.593289	0.6	0.58377	0.596078	0.598693	0.602883	0.612352	0.593264	0.6	0.617801	0.59375	0.599462	0.603217	0.610354	0.626039	0.594005	0.60241	0.614541	0.597015	0.625337	0.598931	0.60631	0.614973	0.584239	0.613297	0.61745	0.637483	0.616874	0.595862	0.602583	0.601671	0.597796	0.603616	0.614743	0.60372	0.629526	0.607703
0.5104334	0.590361	0.584302	0.596591	0.57971	0.56975	0.602241	0.588905	0.599462	0.609164	0.582763	0.583799	0.614306	0.6	0.604196	0.58478	0.589333	0.602667	0.57754	0.61126	0.583884	0.588079	0.59279	0.584329	0.595336	0.604651	0.584145	0.611032	0.59249	0.581967	0.591036	0.598338	0.602476	0.600273	0.591036	0.597544	0.585298	0.598338	0.624657	0.608939	0.596045	0.588732	0.580645	0.594595	0.59353	0.588068	0.59375	0.596491	0.605974	0.586006
0.5276461	0.599406	0.593123	0.593838	0.594286	0.570188	0.607735	0.59467	0.612732	0.62766	0.596491	0.600551	0.611342	0.613514	0.617931	0.603426	0.605263	0.623684	0.601583	0.632275	0.597132	0.60915	0.616601	0.605505	0.622463	0.620783	0.603567	0.613668	0.60631	0.606469	0.607735	0.625683	0.618725	0.602961	0.610497	0.613728	0.604651	0.601093	0.62973	0.628099	0.623955	0.611111	0.598266	0.591865	0.599168	0.605042	0.605042	0.602306	0.628331	0.614942
0.5324881	0.577381	0.583333	0.589888	0.584527	0.574746	0.606648	0.596343	0.611702	0.626667	0.592693	0.596685	0.610263	0.615176	0.603043	0.599736	0.617414	0.604222	0.597884	0.628647	0.593464	0.615989	0.610304	0.607096	0.605156	0.611637	0.596974	0.601399	0.594223	0.605405	0.606648	0.59726	0.609524	0.601889	0.598338	0.607287	0.595336	0.605479	0.626016	0.621547	0.611732	0.590529	0.576812	0.579465	0.603616	0.592697	0.595506	0.604046	0.618847	0.610951
0.5477308	0.585294	0.59375	0.6	0.606232	0.582496	0.613699	0.600835	0.623684	0.630607	0.607764	0.595628	0.622771	0.619303	0.621067	0.614379	0.608355	0.624021	0.612565	0.632546	0.600259	0.601816	0.611765	0.618986	0.620134	0.615796	0.604082	0.611342	0.60136	0.601604	0.616438	0.607046	0.619112	0.606141	0.610959	0.611482	0.594301	0.620596	0.632708	0.625683	0.604972	0.597796	0.590258	0.59249	0.594223	0.6	0.605556	0.602857	0.631432	0.621083
0.5402844	0.593472	0.593123	0.602241	0.597143	0.590449	0.610497	0.605891	0.615385	0.630319	0.623482	0.603306	0.622407	0.610811	0.62069	0.613966	0.623684	0.631579	0.62533	0.624339	0.61017	0.616993	0.608696	0.618611	0.61705	0.626181	0.628258	0.633194	0.611797	0.61186	0.618784	0.620219	0.640434	0.624495	0.621547	0.61642	0.615595	0.631147	0.654054	0.650138	0.618384	0.622222	0.615607	0.605891	0.621359	0.633053	0.633053	0.636888	0.642356	0.635058
0.5483871	0.583964	0.59854	0.587732	0.596798	0.58997	0.596343	0.602857	0.596491	0.606225	0.601648	0.597476	0.608451	0.610729	0.623595	0.587131	0.607764	0.613119	0.604027	0.61642	0.575597	0.606383	0.603217	0.613333	0.62259	0.612637	0.597765	0.622159	0.600559	0.603567	0.613221	0.598053	0.618784	0.610959	0.613221	0.608219	0.601671	0.628651	0.635488	0.633941	0.604255	0.585573	0.589102	0.602857	0.601695	0.60485	0.619116	0.61674	0.637143	0.623719
0.5371248	0.569733	0.584527	0.579832	0.568571	0.564399	0.59116	0.597476	0.596817	0.609043	0.612686	0.619835	0.611342	0.616216	0.606897	0.613966	0.602632	0.610526	0.609499	0.621693	0.584094	0.616993	0.621871	0.610747	0.614344	0.615385	0.60631	0.613668	0.592593	0.609164	0.59116	0.603825	0.616011	0.619112	0.610497	0.61642	0.601915	0.612022	0.618919	0.633609	0.601671	0.597222	0.595376	0.59467	0.601942	0.610644	0.619048	0.616715	0.611501	0.609195
0.5475040	0.583082	0.591837	0.584046	0.59593	0.583211	0.592697	0.587732	0.603774	0.602703	0.603567	0.59944	0.613221	0.60989	0.603086	0.5917	0.588235	0.606952	0.600536	0.61828	0.590728	0.586985	0.60241	0.604527	0.616231	0.60631	0.613668	0.635461	0.608089	0.6	0.61236	0.6	0.615172	0.607387	0.617977	0.621067	0.623088	0.636111	0.629121	0.641457	0.609065	0.596045	0.591176	0.579173	0.606488	0.609687	0.609687	0.601173	0.621969	0.622807
0.5367412	0.575712	0.581766	0.585573	0.588745	0.584795	0.596932	0.589235	0.605087	0.614765	0.59673	0.586926	0.603352	0.603001	0.5961	0.593085	0.59761	0.605578	0.599201	0.622163	0.586842	0.614776	0.611702	0.60582	0.598361	0.599455	0.603878	0.616901	0.587258	0.595918	0.599721	0.587586	0.619178	0.597826	0.6053	0.605978	0.596685	0.612414	0.619372	0.631432	0.604782	0.60028	0.589781	0.583569	0.602241	0.611032	0.611032	0.614265	0.634561	0.606676
0.5205047	0.554074	0.575107	0.584615	0.570613	0.554913	0.57931	0.588235	0.590728	0.608234	0.58221	0.58597	0.593923	0.593792	0.592287	0.594737	0.604468	0.599212	0.600791	0.626156	0.583333	0.5953	0.589474	0.609948	0.610811	0.614555	0.60274	0.610028	0.591781	0.594886	0.615172	0.581173	0.623306	0.596774	0.604138	0.602151	0.598361	0.616644	0.626181	0.627235	0.600835	0.599168	0.582973	0.588235	0.598338	0.59021	0.598601	0.595684	0.616247	0.608321
0.5301587	0.575261	0.57554	0.590717	0.579627	0.563953	0.601942	0.597183	0.609854	0.606141	0.590786	0.591978	0.608333	0.594301	0.598338	0.603175	0.612946	0.610304	0.606622	0.626826	0.604712	0.598425	0.603175	0.605263	0.597826	0.609756	0.595041	0.613445	0.600551	0.600812	0.613037	0.600823	0.626703	0.605405	0.610263	0.613514	0.596154	0.609054	0.629579	0.633472	0.612587	0.619247	0.595065	0.591549	0.604457	0.604782	0.607595	0.610709	0.611268	0.603175
0.5236593	0.568889	0.577968	0.587413	0.582026	0.554913	0.609655	0.596639	0.603974	0.608234	0.587601	0.594223	0.596685	0.596491	0.603306	0.594737	0.604468	0.607096	0.611331	0.636724	0.604167	0.618799	0.610526	0.604712	0.616216	0.617251	0.608219	0.615599	0.610959	0.600269	0.604138	0.613915	0.631436	0.604839	0.615172	0.615591	0.617486	0.622101	0.634278	0.646492	0.623088	0.60749	0.585859	0.605042	0.603878	0.604196	0.60979	0.615827	0.613445	0.593974
0.5364341	0.58309	0.591549	0.586777	0.592697	0.577525	0.611413	0.609655	0.62141	0.623037	0.61089	0.604336	0.598639	0.606383	0.610583	0.609598	0.61658	0.61399	0.625974	0.638021	0.605905	0.607465	0.61738	0.616774	0.620506	0.616202	0.615385	0.609054	0.59919	0.602122	0.608696	0.61828	0.635514	0.601325	0.625	0.614569	0.608344	0.637097	0.638298	0.653116	0.635616	0.614754	0.599432	0.609655	0.60573	0.61157	0.608815	0.617564	0.617931	0.60452
0.5417957	0.576419	0.585091	0.588721	0.586255	0.573864	0.597015	0.606061	0.607562	0.624837	0.607427	0.611637	0.600544	0.61089	0.596206	0.624352	0.615783	0.61837	0.619974	0.647594	0.607692	0.606684	0.608808	0.615979	0.617021	0.618037	0.606469	0.616438	0.601078	0.603974	0.605156	0.620134	0.64	0.621693	0.618725	0.613757	0.623656	0.630872	0.634794	0.641407	0.626539	0.60573	0.587234	0.597796	0.613079	0.607978	0.621733	0.613861	0.630854	0.620592
0.5390505	0.573487	0.590529	0.59673	0.591667	0.582279	0.596774	0.603001	0.617571	0.626943	0.609724	0.613941	0.605653	0.607895	0.622819	0.608472	0.620513	0.625641	0.627249	0.64433	0.60737	0.619108	0.623877	0.62069	0.632411	0.622865	0.632844	0.610583	0.600801	0.611549	0.61828	0.625	0.649934	0.615989	0.63172	0.634338	0.617843	0.646277	0.65	0.656837	0.639566	0.627027	0.603933	0.611187	0.62888	0.607629	0.621253	0.621849	0.619372	0.608939
0.5358255	0.573939	0.611032	0.594744	0.592384	0.571429	0.60573	0.598338	0.618611	0.622865	0.602667	0.606803	0.617486	0.619493	0.626703	0.611979	0.613784	0.626788	0.612777	0.624837	0.597938	0.612403	0.614583	0.626943	0.628342	0.616	0.612466	0.597796	0.582656	0.596538	0.603001	0.601889	0.608579	0.62234	0.608458	0.619681	0.594595	0.612686	0.638184	0.631293	0.607978	0.600823	0.582026	0.595568	0.589041	0.591978	0.611342	0.611664	0.626039	0.604255
0.5446009	0.576471	0.590909	0.591667	0.594901	0.582496	0.608219	0.600835	0.618421	0.609499	0.613119	0.601093	0.603567	0.603217	0.615595	0.601307	0.62141	0.616188	0.623037	0.64042	0.615783	0.619974	0.619608	0.624187	0.625503	0.613119	0.62585	0.625173	0.612245	0.612299	0.624657	0.617886	0.624495	0.630174	0.610959	0.608812	0.613297	0.626016	0.63807	0.647541	0.61326	0.614325	0.590258	0.609179	0.605227	0.622222	0.622222	0.611429	0.620306	0.612536
0.5454545	0.597938	0.59744	0.584145	0.58156	0.583333	0.609054	0.607242	0.613966	0.626156	0.619303	0.623803	0.629121	0.625503	0.630137	0.625655	0.63268	0.637908	0.626474	0.630749	0.608808	0.631169	0.646597	0.638021	0.650538	0.627346	0.621253	0.614958	0.59673	0.607764	0.611797	0.624152	0.633423	0.644385	0.620027	0.63369	0.616848	0.635007	0.64698	0.645691	0.611342	0.604138	0.596844	0.5961	0.614325	0.606398	0.634214	0.629471	0.626741	0.624822
0.5536547	0.599415	0.59322	0.604972	0.6	0.576319	0.613079	0.594744	0.620419	0.619423	0.617843	0.61413	0.616644	0.621333	0.617687	0.611183	0.618182	0.625974	0.614583	0.626632	0.594595	0.614193	0.626788	0.626132	0.638184	0.609854	0.611637	0.627235	0.603518	0.601064	0.60218	0.614555	0.621151	0.621514	0.607629	0.62417	0.609986	0.625337	0.637333	0.644022	0.618132	0.60274	0.586895	0.603043	0.607387	0.61326	0.616022	0.619318	0.64177	0.617564
0.5182830	0.576119	0.585014	0.571831	0.586207	0.570597	0.608333	0.606488	0.605333	0.606952	0.602442	0.581717	0.609179	0.605978	0.596394	0.606622	0.619048	0.619048	0.602122	0.619681	0.602883	0.596583	0.619868	0.627141	0.609524	0.599729	0.595862	0.617111	0.598621	0.604336	0.591667	0.593407	0.619372	0.622463	0.602778	0.611637	0.594223	0.604396	0.627717	0.609418	0.593838	0.586592	0.578488	0.586742	0.585774	0.585916	0.611268	0.611594	0.623413	0.618497
0.5209302	0.580175	0.585916	0.584022	0.573034	0.549075	0.603261	0.587586	0.610966	0.612565	0.592298	0.593496	0.609524	0.611702	0.605156	0.607004	0.606218	0.621762	0.605195	0.609375	0.60077	0.604891	0.612192	0.619355	0.61518	0.602922	0.604588	0.620027	0.591093	0.596817	0.595109	0.596774	0.619493	0.606622	0.611413	0.625166	0.602961	0.623656	0.625	0.609756	0.60274	0.592896	0.582386	0.598621	0.611187	0.584022	0.606061	0.603399	0.615172	0.601695
0.5394322	0.586667	0.572246	0.576224	0.576319	0.566474	0.573793	0.577031	0.593378	0.589641	0.584906	0.58597	0.596685	0.591093	0.592287	0.597368	0.60184	0.604468	0.598155	0.610304	0.59375	0.597911	0.6	0.612565	0.608108	0.603774	0.591781	0.598886	0.564384	0.592194	0.595862	0.589359	0.612466	0.580645	0.601379	0.599462	0.579235	0.611187	0.612686	0.61348	0.595271	0.585298	0.568543	0.588235	0.595568	0.593007	0.593007	0.592806	0.605042	0.602583
0.5320513	0.577444	0.586357	0.592908	0.581766	0.560117	0.593007	0.59375	0.620134	0.61642	0.595628	0.596932	0.605042	0.615595	0.606145	0.608	0.601864	0.61518	0.595461	0.615796	0.598945	0.600529	0.602667	0.615385	0.632877	0.612022	0.613889	0.618644	0.586111	0.597544	0.595804	0.59751	0.629121	0.599455	0.612587	0.621253	0.598338	0.622407	0.626539	0.622036	0.617772	0.599156	0.600293	0.602273	0.609551	0.595745	0.612766	0.610219	0.616477	0.60262
0.5278219	0.567164	0.573487	0.577465	0.589081	0.558952	0.586111	0.578279	0.592	0.590909	0.580733	0.576177	0.595271	0.595109	0.601942	0.58543	0.597884	0.589947	0.586207	0.609043	0.571429	0.596583	0.593378	0.603426	0.614966	0.599729	0.598621	0.622721	0.590345	0.607046	0.594444	0.601648	0.619372	0.589986	0.605556	0.611637	0.605227	0.618132	0.625	0.620499	0.616247	0.603352	0.584302	0.595205	0.599721	0.602817	0.602817	0.605797	0.598025	0.589595
0.5504000	0.582583	0.588406	0.577904	0.586705	0.568082	0.603352	0.592908	0.595174	0.604839	0.589359	0.584958	0.595804	0.595628	0.596932	0.593875	0.603723	0.606383	0.608	0.63369	0.582345	0.602378	0.623169	0.619868	0.615595	0.603001	0.610263	0.631876	0.601942	0.60218	0.611732	0.607735	0.636488	0.609524	0.617318	0.614966	0.605809	0.629834	0.625683	0.629526	0.622535	0.598315	0.584795	0.595745	0.597476	0.589235	0.617564	0.612245	0.615603	0.604651
0.5194401	0.55848	0.584746	0.577348	0.585916	0.562054	0.60218	0.594744	0.594241	0.60105	0.588549	0.595109	0.594816	0.605333	0.590476	0.605982	0.602597	0.615584	0.614583	0.631854	0.597169	0.616774	0.624187	0.626132	0.630174	0.604527	0.614344	0.624484	0.603518	0.601064	0.613079	0.603774	0.626506	0.618858	0.615804	0.629482	0.604588	0.619946	0.629333	0.627717	0.618132	0.594521	0.589744	0.583679	0.604651	0.596685	0.621547	0.605114	0.625173	0.609065
0.5390750	0.568862	0.589595	0.584746	0.59366	0.581022	0.601671	0.596888	0.601604	0.613941	0.604082	0.6	0.608089	0.599455	0.598053	0.586985	0.599469	0.602122	0.598404	0.624	0.57293	0.598155	0.61089	0.615588	0.622101	0.62585	0.611342	0.613221	0.61964	0.586956	0.601671	0.614325	0.618331	0.60787	0.601671	0.618725	0.609655	0.633609	0.621253	0.613889	0.601124	0.588235	0.586006	0.599717	0.59021	0.576271	0.60452	0.590116	0.622348	0.597101
0.5375626	0.571875	0.599398	0.588235	0.597598	0.575342	0.571014	0.592047	0.586111	0.601671	0.591231	0.592485	0.592163	0.586402	0.596237	0.571035	0.581267	0.586777	0.593923	0.620499	0.570259	0.585499	0.582069	0.600823	0.598582	0.594059	0.592806	0.606149	0.578417	0.587571	0.597101	0.593123	0.611664	0.600846	0.605797	0.61213	0.591105	0.604584	0.614731	0.604046	0.581871	0.594752	0.598784	0.592047	0.590975	0.567647	0.594118	0.60303	0.606775	0.592145
0.5564648	0.607362	0.600592	0.604046	0.613569	0.58296	0.598291	0.607815	0.603825	0.613699	0.606398	0.599432	0.624822	0.615599	0.617354	0.602442	0.601626	0.612466	0.605978	0.623978	0.593289	0.605653	0.602442	0.609986	0.622036	0.620306	0.602546	0.615827	0.594059	0.602778	0.606838	0.602817	0.637762	0.59362	0.621083	0.60749	0.603667	0.63662	0.637883	0.630682	0.617816	0.624642	0.61194	0.607815	0.606581	0.598266	0.612717	0.616071	0.613603	0.599406
0.5518395	0.591549	0.600302	0.589102	0.607519	0.597561	0.597968	0.60472	0.586926	0.610879	0.611898	0.610709	0.613372	0.598582	0.62029	0.582873	0.595862	0.606897	0.59751	0.601942	0.576503	0.59726	0.604972	0.60989	0.607954	0.617564	0.610951	0.604106	0.596542	0.611032	0.618287	0.593974	0.62963	0.60452	0.62119	0.607345	0.583333	0.628408	0.621277	0.625181	0.603221	0.618978	0.60274	0.613569	0.600583	0.600884	0.621502	0.610015	0.622419	0.626324
0.5137615	0.542662	0.534426	0.543131	0.555556	0.527363	0.562893	0.544	0.546547	0.533133	0.542113	0.54232	0.551181	0.552147	0.565149	0.533532	0.553571	0.547619	0.546269	0.550898	0.544919	0.552437	0.557377	0.557037	0.568356	0.569678	0.530421	0.565978	0.549142	0.544342	0.544025	0.506211	0.53621	0.519084	0.531447	0.543512	0.531882	0.540373	0.53681	0.557994	0.520635	0.544304	0.533113	0.5312	0.543444	0.543131	0.536741	0.534654	0.5664	0.569079
0.5241379	0.570048	0.576744	0.580938	0.584235	0.53605	0.614009	0.575758	0.601997	0.589413	0.581395	0.582467	0.59403	0.599709	0.60119	0.589235	0.599717	0.602546	0.598582	0.608819	0.577031	0.595506	0.600567	0.597183	0.591837	0.584302	0.576923	0.599398	0.571006	0.577649	0.590164	0.55081	0.584795	0.576812	0.602086	0.591304	0.569322	0.589102	0.596798	0.597325	0.574436	0.563718	0.56338	0.563636	0.562874	0.586989	0.580938	0.558502	0.609091	0.59098
0.5223368	0.58427	0.574961	0.576169	0.594761	0.55	0.600297	0.58006	0.594595	0.573466	0.57971	0.577778	0.589286	0.606676	0.596439	0.579096	0.606488	0.606488	0.594059	0.609929	0.583799	0.585434	0.581921	0.58427	0.587209	0.608696	0.58997	0.606607	0.578171	0.573083	0.603269	0.56094	0.580175	0.566474	0.597325	0.578035	0.570588	0.581498	0.58926	0.58963	0.569715	0.565022	0.567863	0.567976	0.570149	0.585219	0.573152	0.556765	0.601209	0.582946
0.5510204	0.585056	0.600306	0.600897	0.583206	0.557276	0.621502	0.601796	0.614951	0.596888	0.594828	0.599119	0.587021	0.61295	0.620588	0.59944	0.615385	0.618182	0.614306	0.624473	0.598338	0.608333	0.610644	0.607242	0.622478	0.609195	0.593567	0.60119	0.587719	0.585366	0.600884	0.573508	0.598266	0.593123	0.612666	0.601719	0.58309	0.593886	0.61295	0.602056	0.582467	0.577778	0.587326	0.57485	0.576923	0.591928	0.594918	0.576271	0.610778	0.602151
0.5302782	0.57362	0.588757	0.598266	0.610619	0.556054	0.621083	0.596237	0.617486	0.608219	0.589708	0.596591	0.610556	0.626741	0.617354	0.605156	0.628726	0.623306	0.619565	0.637602	0.612081	0.611036	0.613297	0.604588	0.616457	0.617524	0.605375	0.607194	0.602546	0.597222	0.618234	0.571831	0.612587	0.599168	0.621083	0.60749	0.583921	0.591549	0.618384	0.619318	0.589081	0.573066	0.576119	0.564399	0.583691	0.604046	0.592485	0.5625	0.613603	0.599406
0.5331179	0.578788	0.602339	0.614286	0.618076	0.573117	0.630986	0.600858	0.635135	0.612466	0.605227	0.615169	0.61213	0.633609	0.632911	0.61745	0.635389	0.640751	0.63172	0.644205	0.616202	0.628495	0.633557	0.638184	0.62069	0.616231	0.595804	0.614509	0.606993	0.604396	0.616901	0.582173	0.625173	0.611797	0.633803	0.622771	0.588564	0.604457	0.630854	0.620787	0.590909	0.592068	0.60472	0.58083	0.594059	0.611429	0.611429	0.588235	0.632332	0.601173
0.5533981	0.588771	0.603221	0.606581	0.621898	0.576923	0.631876	0.618911	0.635995	0.626866	0.608815	0.610408	0.612994	0.631724	0.628169	0.612903	0.630872	0.638926	0.637954	0.642375	0.617021	0.629333	0.629032	0.620321	0.624309	0.61708	0.621849	0.635328	0.602241	0.610729	0.637518	0.594142	0.631579	0.626374	0.648801	0.620879	0.606145	0.613668	0.628965	0.62166	0.603129	0.595745	0.602659	0.590258	0.620397	0.609442	0.620887	0.57732	0.630373	0.610866
0.5354839	0.599092	0.607299	0.613409	0.617176	0.569322	0.632911	0.617143	0.631579	0.633288	0.607143	0.617111	0.625352	0.629986	0.626405	0.605898	0.631861	0.637216	0.638926	0.640646	0.615385	0.62766	0.632708	0.618667	0.61708	0.626374	0.614525	0.619318	0.606145	0.60631	0.627286	0.584145	0.618784	0.619178	0.627286	0.619178	0.590529	0.611961	0.629986	0.619916	0.598582	0.596888	0.589102	0.582857	0.615819	0.616263	0.613409	0.581498	0.625714	0.614934
0.5550082	0.596923	0.605341	0.611594	0.60355	0.563718	0.631429	0.618287	0.630137	0.612637	0.613668	0.60114	0.626609	0.625698	0.624822	0.617687	0.630435	0.644022	0.640327	0.639344	0.61642	0.620783	0.617687	0.61705	0.612587	0.622036	0.601418	0.620491	0.61844	0.607242	0.628571	0.587571	0.625526	0.603616	0.622857	0.609179	0.599717	0.60452	0.622905	0.626781	0.585014	0.58046	0.57485	0.583454	0.605452	0.614493	0.605797	0.576119	0.629898	0.604167
0.5535420	0.592593	0.616071	0.622093	0.626113	0.592481	0.641834	0.634643	0.645604	0.619835	0.606993	0.611429	0.639885	0.633053	0.640916	0.603001	0.645777	0.648501	0.628415	0.638356	0.618084	0.619756	0.611187	0.605156	0.622721	0.629371	0.614509	0.633864	0.605974	0.622905	0.638969	0.589235	0.62166	0.608089	0.616046	0.610879	0.595745	0.606232	0.62465	0.611429	0.601156	0.610951	0.597598	0.605531	0.618705	0.613372	0.607558	0.58982	0.646288	0.61791
0.5394322	0.577778	0.592275	0.606993	0.610556	0.569364	0.631724	0.621849	0.627815	0.632138	0.614555	0.621733	0.627072	0.626181	0.625344	0.618421	0.64389	0.638633	0.648221	0.649934	0.614583	0.634465	0.628947	0.63089	0.635135	0.633423	0.613699	0.626741	0.610959	0.611036	0.64	0.600273	0.634146	0.61828	0.642759	0.637097	0.622951	0.622101	0.631579	0.638239	0.617524	0.601942	0.600289	0.588235	0.628809	0.620979	0.618182	0.58705	0.638656	0.611191
0.5614035	0.592814	0.612717	0.624294	0.613833	0.578102	0.623955	0.625177	0.647059	0.627346	0.628571	0.636111	0.627615	0.640327	0.634214	0.626826	0.647215	0.657825	0.646277	0.648	0.61498	0.640316	0.626826	0.626156	0.619372	0.636735	0.616874	0.630099	0.614108	0.61413	0.643454	0.595041	0.623803	0.610583	0.635097	0.629579	0.609655	0.625344	0.632153	0.633333	0.617977	0.613445	0.609329	0.608204	0.629371	0.621469	0.615819	0.590116	0.64215	0.611594
0.5636071	0.595166	0.629738	0.638177	0.630814	0.583211	0.646067	0.647646	0.657682	0.64054	0.636488	0.641457	0.646976	0.645604	0.642356	0.629183	0.657754	0.65508	0.656837	0.658602	0.61192	0.645418	0.634538	0.641811	0.638239	0.652949	0.627615	0.641135	0.627615	0.627397	0.654494	0.616667	0.634483	0.634747	0.651685	0.648427	0.617524	0.627778	0.64011	0.647059	0.620397	0.615819	0.620588	0.613409	0.623413	0.626781	0.62963	0.612903	0.653352	0.616959
0.5543307	0.597633	0.628571	0.636872	0.621083	0.591631	0.658402	0.640559	0.648148	0.628647	0.624495	0.64011	0.637241	0.638814	0.629986	0.620236	0.637795	0.648294	0.642105	0.649076	0.626788	0.63103	0.630749	0.611765	0.634278	0.64603	0.629275	0.645341	0.634747	0.629032	0.650138	0.607629	0.64682	0.636242	0.650138	0.64698	0.619372	0.640327	0.638814	0.651099	0.633333	0.620499	0.622478	0.615385	0.630705	0.625698	0.639665	0.612069	0.665734	0.633238
0.5606061	0.59754	0.596965	0.600985	0.608403	0.56314	0.584814	0.582237	0.588598	0.584235	0.603774	0.589372	0.595469	0.585827	0.583871	0.565749	0.577099	0.580153	0.569678	0.577573	0.543807	0.560606	0.565749	0.556231	0.583596	0.581761	0.573718	0.581699	0.567308	0.562009	0.578352	0.542265	0.579114	0.557994	0.57189	0.573668	0.552716	0.561404	0.576378	0.605475	0.561175	0.569106	0.575809	0.549342	0.551948	0.54844	0.571429	0.573854	0.615132	0.571912
0.5668277	0.619335	0.629738	0.635328	0.630814	0.586156	0.651685	0.647646	0.6469	0.637838	0.631001	0.633053	0.630099	0.637363	0.650771	0.623829	0.649733	0.636364	0.643432	0.653226	0.630464	0.645418	0.645248	0.641811	0.629986	0.644719	0.635983	0.646809	0.633194	0.641096	0.66573	0.611111	0.651034	0.645691	0.63764	0.648427	0.628651	0.644444	0.651099	0.647059	0.634561	0.627119	0.626471	0.619116	0.631876	0.632479	0.635328	0.609971	0.647646	0.628655
0.5476923	0.590449	0.612587	0.626539	0.630405	0.587571	0.647773	0.638356	0.645914	0.650195	0.62533	0.643338	0.632432	0.639366	0.641509	0.628866	0.653797	0.648649	0.655484	0.667529	0.632653	0.652174	0.646907	0.646154	0.642857	0.641161	0.630027	0.634877	0.646113	0.635046	0.653171	0.616822	0.655172	0.639474	0.650472	0.663158	0.617647	0.632844	0.65786	0.66218	0.634014	0.637721	0.623413	0.616438	0.642276	0.629275	0.634747	0.601969	0.660274	0.633941
0.556068	0.583815	0.620112	0.636612	0.615599	0.5811	0.649596	0.632011	0.65544	0.651948	0.637681	0.645161	0.62888	0.627968	0.643338	0.638353	0.650386	0.647815	0.646907	0.664083	0.626752	0.648787	0.638353	0.637644	0.634082	0.624506	0.621151	0.623129	0.618474	0.613158	0.636119	0.608	0.643709	0.633377	0.633423	0.64389	0.611482	0.616	0.620053	0.639785	0.608696	0.626016	0.616901	0.590971	0.627876	0.617486	0.614754	0.581461	0.629275	0.593838
0.5785381	0.616959	0.644068	0.651934	0.639437	0.593438	0.656676	0.658368	0.670157	0.664042	0.644474	0.654891	0.643929	0.656	0.653061	0.642393	0.677922	0.65974	0.664062	0.681462	0.630631	0.668387	0.652796	0.659767	0.654206	0.647137	0.635995	0.657497	0.649526	0.640957	0.656676	0.622641	0.655957	0.640106	0.637602	0.658698	0.634278	0.636119	0.653333	0.652174	0.631868	0.630137	0.623932	0.61964	0.632011	0.635359	0.638122	0.607954	0.661134	0.637394
0.5520505	0.595556	0.632332	0.626573	0.630528	0.578035	0.626207	0.644258	0.643709	0.642762	0.630728	0.629986	0.649171	0.642375	0.658402	0.626316	0.646518	0.633377	0.640316	0.649934	0.611979	0.655353	0.626316	0.638744	0.616216	0.644205	0.619178	0.632312	0.630137	0.624495	0.637241	0.597544	0.626016	0.634409	0.634483	0.637097	0.612022	0.62483	0.631579	0.627235	0.609179	0.610263	0.611833	0.605042	0.609418	0.626573	0.60979	0.598561	0.644258	0.622669
0.5687204	0.599406	0.630373	0.62465	0.637143	0.581766	0.621547	0.633941	0.647215	0.638298	0.626181	0.628099	0.639004	0.635135	0.648276	0.621871	0.647368	0.639474	0.643799	0.65873	0.617992	0.645752	0.632411	0.642202	0.630582	0.645074	0.631001	0.638773	0.639232	0.619946	0.627072	0.601093	0.648575	0.627187	0.643646	0.637954	0.629275	0.63388	0.651351	0.633609	0.632312	0.627778	0.609827	0.603086	0.624133	0.616247	0.62465	0.599424	0.656381	0.62931
0.5527157	0.581709	0.613603	0.622348	0.626263	0.581871	0.641562	0.628895	0.647925	0.630872	0.607629	0.617524	0.625698	0.638472	0.635097	0.609043	0.63745	0.632138	0.631158	0.635514	0.613158	0.638522	0.619681	0.613757	0.628415	0.632153	0.634349	0.639437	0.623269	0.62585	0.644351	0.598621	0.632877	0.622283	0.630405	0.630435	0.621547	0.62069	0.638472	0.639777	0.624473	0.622721	0.613139	0.600567	0.607843	0.619519	0.61669	0.588064	0.640227	0.612482
0.5605096	0.571002	0.600289	0.595205	0.598561	0.574344	0.625869	0.629943	0.624833	0.626506	0.619565	0.624133	0.618384	0.623129	0.625	0.599469	0.635762	0.622517	0.626826	0.647137	0.603675	0.639474	0.618037	0.620053	0.618529	0.625	0.616022	0.632023	0.610497	0.613297	0.636996	0.596974	0.642077	0.628726	0.639777	0.636856	0.630854	0.624484	0.636735	0.632455	0.608696	0.615385	0.611354	0.59887	0.617318	0.614951	0.629055	0.595065	0.627119	0.616498
0.5682889	0.578171	0.609687	0.615599	0.605114	0.569784	0.629121	0.619247	0.638522	0.640212	0.609396	0.630137	0.635488	0.634409	0.631001	0.608126	0.638744	0.633508	0.635171	0.631579	0.619974	0.639792	0.623853	0.6206	0.621803	0.630872	0.608458	0.618585	0.622101	0.605898	0.629121	0.600544	0.634278	0.615796	0.637363	0.626506	0.617687	0.630435	0.63172	0.624657	0.609418	0.61326	0.603448	0.599721	0.626207	0.62117	0.626741	0.590258	0.635983	0.614286
0.5778491	0.590361	0.639535	0.627841	0.617391	0.599119	0.64986	0.640114	0.658602	0.654987	0.640219	0.645251	0.642356	0.649315	0.646154	0.630174	0.648	0.642667	0.65508	0.654156	0.626156	0.656954	0.643525	0.642762	0.647462	0.664843	0.628651	0.64215	0.634214	0.622951	0.638656	0.617729	0.651995	0.633015	0.652661	0.649386	0.635229	0.628809	0.654794	0.653631	0.621469	0.642254	0.627566	0.611664	0.644163	0.647727	0.633523	0.608187	0.642959	0.609329
0.5625000	0.602056	0.624113	0.621359	0.628006	0.584527	0.629275	0.638889	0.651774	0.632411	0.63369	0.619372	0.632877	0.637216	0.644809	0.608355	0.644068	0.636245	0.635294	0.636959	0.607235	0.626943	0.639687	0.623377	0.630027	0.644385	0.630435	0.632597	0.619565	0.635514	0.640219	0.603518	0.642473	0.637333	0.642955	0.637333	0.612466	0.619756	0.64257	0.635744	0.628965	0.629986	0.60372	0.605556	0.612637	0.635229	0.632455	0.599144	0.644444	0.628734
0.5700483	0.616314	0.632653	0.62963	0.627907	0.589102	0.63764	0.650499	0.657682	0.648649	0.641975	0.630252	0.646976	0.651099	0.650771	0.629183	0.641711	0.631016	0.643432	0.650538	0.619868	0.645418	0.634538	0.625832	0.635488	0.650206	0.641562	0.655319	0.630405	0.641096	0.648876	0.619444	0.653793	0.640219	0.651685	0.645691	0.625869	0.630556	0.656593	0.644258	0.626062	0.635593	0.623529	0.616263	0.61213	0.638177	0.632479	0.607038	0.636234	0.631579
0.5691574	0.61194	0.642651	0.639437	0.637931	0.605531	0.638889	0.648801	0.658667	0.644385	0.648575	0.631579	0.653686	0.663044	0.665742	0.619868	0.653439	0.656085	0.649867	0.662234	0.631717	0.64389	0.633113	0.624506	0.631293	0.643148	0.651034	0.633941	0.634483	0.636856	0.647222	0.612637	0.649386	0.641407	0.658333	0.638701	0.618982	0.637363	0.649456	0.642659	0.627451	0.631285	0.627907	0.61213	0.630405	0.630986	0.639437	0.602899	0.651622	0.635838
0.5625966	0.590116	0.61236	0.620879	0.630252	0.592908	0.636856	0.649243	0.645833	0.637076	0.635762	0.643243	0.648575	0.665783	0.644114	0.626132	0.661499	0.666667	0.663212	0.672727	0.642766	0.652118	0.652005	0.638353	0.642762	0.651656	0.643338	0.651163	0.643338	0.637566	0.669377	0.624665	0.663116	0.660502	0.658537	0.649934	0.636242	0.63807	0.65252	0.667568	0.631147	0.629428	0.611898	0.624484	0.628571	0.648352	0.642857	0.612994	0.654745	0.633803
0.5692308	0.596237	0.634965	0.634747	0.638773	0.61017	0.653171	0.654794	0.666667	0.660598	0.646438	0.64603	0.656757	0.668428	0.660377	0.631443	0.669241	0.656371	0.663226	0.670116	0.645408	0.657289	0.657216	0.661539	0.656085	0.651715	0.659517	0.653951	0.640751	0.656126	0.663968	0.635514	0.665783	0.663158	0.674764	0.660526	0.641711	0.659546	0.663144	0.654105	0.653061	0.651289	0.640339	0.630137	0.650406	0.651163	0.662107	0.64135	0.665753	0.650771
0.5610143	0.589286	0.606322	0.609551	0.621776	0.577649	0.612188	0.635724	0.632979	0.621333	0.619756	0.621547	0.635229	0.650406	0.64177	0.612946	0.641161	0.638522	0.640212	0.644562	0.624837	0.634338	0.615588	0.625493	0.624152	0.625169	0.621733	0.632168	0.621733	0.624324	0.645429	0.594521	0.636735	0.620783	0.628809	0.618084	0.620027	0.627397	0.628726	0.632597	0.617318	0.618384	0.602899	0.590717	0.614743	0.623595	0.623595	0.606936	0.649789	0.62536
0.5805423	0.610778	0.627168	0.627119	0.631124	0.59562	0.629526	0.647808	0.644385	0.635389	0.631293	0.630556	0.64993	0.653951	0.650904	0.616202	0.639257	0.639257	0.640957	0.642667	0.628121	0.637681	0.626826	0.626156	0.633015	0.636735	0.614108	0.64135	0.630705	0.638587	0.649025	0.606061	0.637483	0.629579	0.643454	0.626866	0.626207	0.633609	0.634877	0.636111	0.620787	0.613445	0.612245	0.611032	0.623776	0.635593	0.629943	0.607558	0.653465	0.637681
0.5696203	0.606241	0.619799	0.633941	0.646638	0.57971	0.64177	0.648876	0.666667	0.641811	0.624324	0.648276	0.637119	0.657645	0.660221	0.633245	0.671937	0.661397	0.65786	0.670199	0.637076	0.649215	0.649076	0.632546	0.653116	0.643243	0.634615	0.659218	0.648352	0.647773	0.672199	0.615595	0.660326	0.636119	0.661134	0.644205	0.641096	0.640219	0.654939	0.656552	0.633194	0.642559	0.619392	0.620787	0.647222	0.653576	0.645161	0.608947	0.648876	0.647482
0.5786963	0.591045	0.622478	0.619718	0.614942	0.576419	0.647222	0.637518	0.64	0.625668	0.613297	0.634349	0.631432	0.633152	0.626907	0.61192	0.642857	0.632275	0.625995	0.643617	0.613368	0.633377	0.627815	0.608696	0.617687	0.610583	0.623448	0.628331	0.615172	0.631436	0.636111	0.587912	0.630286	0.622463	0.636111	0.630582	0.627235	0.631868	0.641304	0.620499	0.619048	0.606145	0.616279	0.595205	0.619247	0.614085	0.633803	0.594203	0.643159	0.635838
0.5636943	0.600897	0.629149	0.634697	0.641727	0.586006	0.645341	0.646893	0.651535	0.634538	0.619565	0.621359	0.629526	0.642177	0.641667	0.612732	0.649007	0.649007	0.642762	0.663116	0.624672	0.642105	0.633952	0.630607	0.632153	0.641304	0.632597	0.643258	0.624309	0.629579	0.670376	0.599725	0.644809	0.636856	0.653686	0.636856	0.639119	0.635488	0.658503	0.632455	0.625526	0.634965	0.608442	0.612994	0.631285	0.620592	0.626234	0.597968	0.641243	0.642547
0.5636943	0.571002	0.611833	0.614951	0.61295	0.574344	0.623088	0.635593	0.630174	0.626506	0.625	0.621359	0.623955	0.634014	0.636111	0.607427	0.630464	0.643709	0.648074	0.652463	0.627297	0.647368	0.628647	0.635884	0.626703	0.641304	0.629834	0.632023	0.604972	0.618725	0.634214	0.621733	0.653006	0.647697	0.645341	0.636856	0.628099	0.635488	0.644898	0.640777	0.619916	0.620979	0.60262	0.624294	0.614525	0.614951	0.620592	0.597968	0.627119	0.628075
0.5838710	0.590015	0.627737	0.636234	0.622999	0.587021	0.644163	0.642857	0.653171	0.641407	0.631868	0.631136	0.630986	0.635488	0.634831	0.608579	0.645248	0.645248	0.625503	0.648721	0.615385	0.630319	0.621984	0.616	0.628099	0.634615	0.631285	0.630682	0.614525	0.625514	0.638537	0.611961	0.629834	0.643836	0.630099	0.652055	0.615599	0.620306	0.629986	0.639551	0.607092	0.625177	0.615611	0.608571	0.61017	0.60485	0.601997	0.604993	0.634286	0.620791
0.5704918	0.602151	0.616296	0.633864	0.629247	0.595808	0.624822	0.637681	0.637483	0.622771	0.615599	0.628734	0.64	0.627615	0.635328	0.619565	0.643148	0.635007	0.642177	0.635744	0.61828	0.633423	0.625	0.616216	0.611732	0.623955	0.623229	0.639769	0.611898	0.625869	0.644793	0.598025	0.644258	0.630556	0.644793	0.619444	0.607345	0.623413	0.638773	0.640114	0.633093	0.628408	0.618834	0.605797	0.621776	0.616498	0.642547	0.614009	0.652174	0.627043
0.5766063	0.601852	0.610119	0.610465	0.614243	0.589474	0.630373	0.62591	0.637363	0.614325	0.612587	0.611429	0.622669	0.62465	0.626609	0.60573	0.629428	0.634877	0.628415	0.643836	0.609986	0.633288	0.603001	0.597015	0.622721	0.618182	0.614509	0.639653	0.620199	0.608939	0.65043	0.603399	0.64135	0.619247	0.633238	0.624826	0.609929	0.617564	0.630252	0.631429	0.612717	0.622478	0.621622	0.60262	0.618705	0.613372	0.610465	0.586826	0.62591	0.614925
0.5686591	0.60303	0.628655	0.622857	0.618076	0.587888	0.642254	0.635193	0.632432	0.631436	0.624484	0.620787	0.631876	0.61157	0.62166	0.614765	0.63807	0.640751	0.642473	0.649596	0.621514	0.639148	0.636242	0.622163	0.62069	0.627235	0.623776	0.637269	0.60979	0.642857	0.650704	0.607242	0.647303	0.628258	0.63662	0.628258	0.622036	0.626741	0.636364	0.629213	0.630682	0.614731	0.622419	0.615165	0.619519	0.622857	0.631429	0.6	0.643777	0.615836
0.5660964	0.602339	0.612994	0.624309	0.633803	0.584879	0.623978	0.633472	0.643979	0.616798	0.628495	0.630435	0.633015	0.64	0.631293	0.618986	0.646753	0.644156	0.645833	0.65013	0.633205	0.634839	0.63199	0.633894	0.635514	0.636485	0.638701	0.651995	0.633288	0.635638	0.667575	0.61186	0.65328	0.63745	0.648501	0.640106	0.620783	0.628032	0.645333	0.654891	0.634615	0.616438	0.612536	0.625173	0.621067	0.632597	0.629834	0.607954	0.644537	0.626062
0.5723577	0.612805	0.617647	0.617816	0.618768	0.58841	0.637394	0.62446	0.633152	0.621253	0.614108	0.621469	0.632624	0.631579	0.625177	0.612686	0.644205	0.628032	0.632432	0.644986	0.624833	0.634538	0.631579	0.61745	0.618585	0.625173	0.624473	0.638054	0.610408	0.632597	0.64306	0.59944	0.639777	0.626207	0.631728	0.631724	0.611501	0.619048	0.626039	0.627119	0.617143	0.621083	0.608309	0.607194	0.614509	0.597701	0.62069	0.606509	0.633093	0.59882
0.5652893	0.588235	0.597015	0.603499	0.613095	0.573152	0.600575	0.616058	0.61157	0.610497	0.605891	0.610315	0.621583	0.623595	0.625538	0.599179	0.625683	0.620219	0.616438	0.626374	0.598105	0.621438	0.604651	0.617687	0.616034	0.625526	0.607703	0.612482	0.601997	0.616247	0.635058	0.582386	0.626234	0.620979	0.62931	0.612587	0.614509	0.625	0.634831	0.624642	0.611594	0.601156	0.60241	0.586861	0.603175	0.603499	0.606414	0.582583	0.618978	0.592814
0.5709625	0.605505	0.60767	0.619596	0.617647	0.581222	0.613636	0.629149	0.626703	0.617486	0.621359	0.626062	0.631579	0.638889	0.624113	0.625169	0.632432	0.627027	0.631436	0.63587	0.613119	0.622819	0.61705	0.619112	0.609179	0.635229	0.617772	0.639885	0.61213	0.626039	0.639204	0.595506	0.644351	0.630705	0.636364	0.622407	0.616034	0.61236	0.633333	0.654391	0.621776	0.617143	0.598214	0.603175	0.610556	0.608069	0.62536	0.599406	0.643579	0.60355
0.5784314	0.612557	0.605613	0.606061	0.612666	0.576119	0.603129	0.621387	0.616644	0.618331	0.625	0.621277	0.623932	0.642559	0.630682	0.615176	0.630582	0.622463	0.618725	0.636735	0.597855	0.61828	0.617886	0.625337	0.618384	0.633333	0.624294	0.626437	0.601695	0.618585	0.631579	0.590717	0.642458	0.614958	0.628734	0.626039	0.614085	0.616034	0.625869	0.643972	0.61406	0.609442	0.599106	0.592485	0.602857	0.597403	0.620491	0.600297	0.632948	0.592593
0.5562914	0.586047	0.600897	0.607299	0.61997	0.583082	0.610072	0.622807	0.631724	0.639004	0.626405	0.625538	0.608069	0.632911	0.62931	0.610959	0.618331	0.604651	0.628258	0.629986	0.620596	0.619565	0.613699	0.623978	0.602817	0.623595	0.614286	0.616279	0.611429	0.614306	0.627338	0.59175	0.644068	0.621849	0.62446	0.619048	0.60114	0.611664	0.62166	0.639885	0.615385	0.602026	0.600302	0.596491	0.606936	0.59854	0.607299	0.577444	0.622807	0.596702
0.5612903	0.599092	0.592701	0.584879	0.611354	0.560472	0.607595	0.611429	0.618084	0.606225	0.604396	0.605891	0.605634	0.632737	0.626405	0.597855	0.623829	0.618474	0.625503	0.632571	0.602122	0.617021	0.61126	0.626667	0.61708	0.620879	0.614525	0.630682	0.594972	0.59808	0.62166	0.584145	0.627072	0.608219	0.618847	0.616438	0.604457	0.603616	0.618982	0.617111	0.601418	0.605375	0.589102	0.591429	0.59887	0.587732	0.596291	0.587372	0.622857	0.600293
0.5681063	0.584759	0.614693	0.612006	0.627803	0.581818	0.623377	0.624633	0.636238	0.626907	0.628169	0.62446	0.615607	0.634697	0.62536	0.615385	0.620027	0.628258	0.632737	0.64	0.61413	0.621253	0.618132	0.622951	0.615819	0.611268	0.616046	0.61516	0.601719	0.616034	0.629149	0.587732	0.640227	0.623595	0.626263	0.61236	0.588571	0.613409	0.620592	0.635971	0.608442	0.606676	0.611195	0.612903	0.614493	0.612006	0.626647	0.591252	0.639296	0.607519
0.5679443	0.578862	0.594679	0.589313	0.595944	0.56962	0.586466	0.59633	0.592806	0.603175	0.609971	0.614693	0.599398	0.61674	0.612613	0.585714	0.601997	0.593438	0.600858	0.608321	0.584746	0.603399	0.597143	0.59375	0.602941	0.604106	0.585075	0.595745	0.579105	0.58858	0.607519	0.57058	0.60472	0.578947	0.610526	0.593567	0.577381	0.585438	0.596182	0.596702	0.600911	0.593041	0.578199	0.577982	0.589124	0.592366	0.601527	0.579528	0.617737	0.602826
0.5476603	0.592233	0.595016	0.601824	0.593168	0.548032	0.613773	0.611872	0.616046	0.606322	0.607299	0.614925	0.611694	0.622807	0.624813	0.603129	0.616477	0.616477	0.615385	0.625714	0.587904	0.620592	0.611664	0.613861	0.617862	0.618978	0.594354	0.611195	0.606241	0.603499	0.60479	0.579882	0.628487	0.611354	0.610778	0.617176	0.592593	0.588757	0.614035	0.623881	0.595166	0.596386	0.591195	0.587519	0.598496	0.592705	0.598784	0.586207	0.608828	0.60625
0.5600000	0.594156	0.5875	0.576219	0.595016	0.562401	0.60961	0.616794	0.597701	0.587896	0.591508	0.60479	0.616541	0.615836	0.611694	0.582026	0.609687	0.60114	0.602857	0.624642	0.583921	0.596888	0.590585	0.590071	0.596182	0.626647	0.578241	0.610015	0.599106	0.614035	0.594595	0.566766	0.606775	0.592701	0.594595	0.592701	0.579495	0.587537	0.589443	0.616766	0.581818	0.595166	0.577287	0.583206	0.585219	0.576219	0.585366	0.584906	0.60458	0.595611
0.5674256	0.581699	0.581761	0.579755	0.589342	0.562798	0.592145	0.602151	0.592485	0.6	0.592047	0.599398	0.599092	0.60767	0.612368	0.582496	0.610315	0.598854	0.594828	0.619596	0.58156	0.600284	0.596844	0.582026	0.599705	0.600884	0.590705	0.60458	0.575712	0.602941	0.592145	0.576119	0.616296	0.599119	0.607251	0.584435	0.571002	0.58209	0.59587	0.596386	0.582317	0.589666	0.571429	0.571429	0.576631	0.57362	0.592024	0.575949	0.605223	0.605678
0.5372051	0.564189	0.587662	0.575949	0.582524	0.581281	0.573209	0.614897	0.580357	0.573134	0.576631	0.586956	0.586584	0.571429	0.581649	0.558346	0.572271	0.557522	0.571006	0.596439	0.543066	0.582723	0.5613	0.575624	0.56621	0.594841	0.568779	0.588976	0.568779	0.578788	0.582554	0.550769	0.601527	0.565809	0.576324	0.580938	0.579353	0.56	0.586626	0.596273	0.569182	0.573668	0.563934	0.548336	0.56338	0.591772	0.579114	0.591503	0.621236	0.596091
0.5551724	0.589372	0.589147	0.580938	0.602782	0.573668	0.605067	0.615151	0.599144	0.609442	0.59593	0.600297	0.61791	0.608442	0.60119	0.592068	0.608204	0.602546	0.595745	0.623044	0.582633	0.606742	0.577904	0.594366	0.594752	0.598837	0.60355	0.61747	0.600592	0.597968	0.622951	0.574374	0.622807	0.594203	0.605067	0.6	0.59587	0.60972	0.614265	0.627043	0.589474	0.5997	0.57903	0.560606	0.598802	0.608169	0.611195	0.602184	0.636364	0.622084
0.5627119	0.599049	0.601527	0.602086	0.60274	0.570988	0.61674	0.614925	0.607595	0.603667	0.60745	0.600293	0.620588	0.602583	0.609971	0.586592	0.608089	0.591353	0.59021	0.631136	0.585635	0.601108	0.581006	0.594444	0.583333	0.604584	0.609329	0.617211	0.594752	0.597997	0.619677	0.595065	0.619596	0.608571	0.604993	0.597143	0.601744	0.606676	0.608321	0.623719	0.592593	0.605613	0.594761	0.576119	0.581121	0.611028	0.611028	0.614439	0.620896	0.588055
0.5568369	0.589506	0.598214	0.598837	0.611276	0.577444	0.60745	0.605531	0.615385	0.61708	0.606993	0.62	0.634146	0.616247	0.615165	0.592087	0.621253	0.60218	0.606557	0.635616	0.593792	0.61705	0.597544	0.602442	0.597476	0.618182	0.605974	0.628075	0.600284	0.606145	0.633238	0.589235	0.638537	0.616457	0.624642	0.610879	0.61844	0.623229	0.619048	0.631429	0.595376	0.605187	0.597598	0.57933	0.601439	0.616279	0.619186	0.616766	0.634643	0.602985
0.5602716	0.596825	0.605505	0.6	0.615854	0.587326	0.611765	0.603886	0.608451	0.61017	0.608321	0.618768	0.63623	0.623563	0.613803	0.601399	0.617318	0.617318	0.607843	0.634831	0.591978	0.613037	0.601399	0.617524	0.607194	0.622669	0.610219	0.618128	0.59562	0.598854	0.620588	0.587209	0.632035	0.600858	0.620588	0.609442	0.60262	0.636628	0.62069	0.639296	0.602374	0.60355	0.589506	0.585949	0.587888	0.6	0.623881	0.609231	0.64574	0.607362
0.5289256	0.566563	0.58806	0.591837	0.610119	0.585219	0.612069	0.60438	0.606061	0.604972	0.614306	0.598854	0.618705	0.606742	0.602583	0.585499	0.620219	0.598361	0.610959	0.626374	0.584574	0.599729	0.588235	0.598639	0.596343	0.622721	0.593438	0.618287	0.607703	0.593838	0.609195	0.59375	0.623413	0.595804	0.609195	0.595804	0.603129	0.610796	0.609551	0.633238	0.594203	0.606936	0.605422	0.592701	0.594517	0.606414	0.600583	0.606607	0.624818	0.58982
0.5348460	0.556231	0.592375	0.595989	0.614035	0.571852	0.615819	0.608321	0.615176	0.597826	0.606897	0.602817	0.636492	0.616022	0.614951	0.589502	0.634409	0.623656	0.625337	0.645946	0.596538	0.611482	0.600269	0.618474	0.59751	0.637241	0.603086	0.624822	0.611501	0.600551	0.629943	0.589386	0.632455	0.618982	0.624294	0.610729	0.618182	0.606145	0.621547	0.63662	0.60114	0.625	0.60355	0.579627	0.598582	0.616046	0.613181	0.60767	0.642755	0.602941
0.5374593	0.555725	0.594993	0.598561	0.584435	0.568452	0.612766	0.596542	0.609524	0.583902	0.587258	0.594059	0.613636	0.601942	0.606232	0.591892	0.618084	0.604588	0.603518	0.616011	0.588235	0.597855	0.589189	0.596774	0.583333	0.614958	0.597183	0.616046	0.605634	0.594744	0.61844	0.580645	0.618384	0.61326	0.615603	0.60221	0.587079	0.591865	0.621359	0.625177	0.58083	0.619116	0.594354	0.567723	0.586895	0.604317	0.58705	0.592593	0.619596	0.593796
0.5271565	0.56072	0.587554	0.599717	0.594517	0.561404	0.6053	0.603399	0.607764	0.604027	0.60218	0.614743	0.622905	0.594816	0.607242	0.579787	0.616202	0.608234	0.604527	0.624833	0.578947	0.609499	0.593085	0.603175	0.592896	0.615804	0.601108	0.616901	0.595568	0.60136	0.616457	0.582069	0.621918	0.61413	0.616457	0.619565	0.596685	0.617931	0.62483	0.614743	0.587904	0.625526	0.607299	0.583569	0.59944	0.611032	0.602546	0.593886	0.631728	0.600871
0.5395800	0.575758	0.602339	0.602857	0.603499	0.581979	0.6	0.626609	0.621622	0.612466	0.605227	0.598315	0.626234	0.614325	0.62166	0.590604	0.624665	0.603217	0.604839	0.628032	0.594954	0.601864	0.590604	0.598131	0.593103	0.624484	0.606993	0.620199	0.615385	0.612637	0.625352	0.604457	0.627939	0.611797	0.619718	0.611797	0.599721	0.601671	0.619835	0.617977	0.590909	0.623229	0.59292	0.569385	0.602546	0.617143	0.605714	0.608823	0.635193	0.612903
0.5415987	0.568807	0.584071	0.590778	0.614706	0.57228	0.596591	0.606061	0.610354	0.603825	0.596394	0.586402	0.614509	0.611111	0.598582	0.595399	0.613514	0.602703	0.601626	0.633152	0.583668	0.604027	0.589986	0.602961	0.595271	0.601942	0.609309	0.599713	0.603667	0.598338	0.616477	0.587079	0.622036	0.591978	0.605114	0.600277	0.596343	0.603933	0.622222	0.628895	0.593123	0.605714	0.598214	0.588745	0.579173	0.596542	0.596542	0.587537	0.626263	0.60355
0.5463576	0.579845	0.606876	0.618978	0.608048	0.589124	0.615827	0.631579	0.626207	0.633472	0.615169	0.61693	0.622478	0.62166	0.62069	0.608219	0.634747	0.621067	0.614541	0.64099	0.590786	0.616848	0.6	0.615804	0.605634	0.629213	0.608571	0.622093	0.611429	0.625526	0.630216	0.600284	0.627119	0.616247	0.615827	0.62465	0.603989	0.608819	0.627286	0.634146	0.603774	0.622286	0.600302	0.596491	0.598266	0.610219	0.624818	0.613534	0.657895	0.623688
0.5309446	0.567939	0.594993	0.601439	0.613803	0.571429	0.604255	0.62536	0.617687	0.594816	0.609418	0.599717	0.622159	0.615811	0.609065	0.594595	0.623482	0.612686	0.606225	0.632293	0.588235	0.592493	0.589189	0.594086	0.591667	0.617729	0.602817	0.616046	0.602817	0.591978	0.612766	0.597476	0.623955	0.616022	0.61844	0.60221	0.592697	0.619916	0.615811	0.636492	0.600858	0.610556	0.612184	0.59366	0.598291	0.604317	0.618705	0.586667	0.634006	0.614476
0.5691057	0.594512	0.626471	0.623563	0.639296	0.615156	0.628895	0.65036	0.638587	0.623978	0.630705	0.627119	0.635461	0.620499	0.633663	0.588394	0.644205	0.617251	0.621622	0.650406	0.611482	0.621151	0.612686	0.606711	0.59362	0.625173	0.618847	0.646638	0.601969	0.621547	0.651558	0.621849	0.659249	0.628965	0.64306	0.631724	0.619916	0.621849	0.645429	0.635593	0.617143	0.638177	0.626113	0.610072	0.611664	0.637931	0.632184	0.621302	0.647482	0.622419
0.5649351	0.590563	0.625551	0.628408	0.632504	0.599406	0.630834	0.637931	0.640434	0.620408	0.624309	0.626234	0.634561	0.614108	0.627119	0.587601	0.643338	0.611036	0.609986	0.635995	0.608	0.620321	0.61186	0.616622	0.609418	0.627072	0.629213	0.642857	0.609551	0.615172	0.639321	0.601399	0.636111	0.633609	0.625177	0.628099	0.610644	0.623776	0.639004	0.640339	0.619116	0.645804	0.619259	0.597701	0.613636	0.631277	0.634146	0.635155	0.655172	0.612666
0.5516129	0.565809	0.59854	0.593438	0.605531	0.578171	0.604782	0.611429	0.615385	0.611637	0.590659	0.580645	0.602817	0.610729	0.615169	0.592493	0.626506	0.597055	0.609396	0.635262	0.602122	0.617021	0.600536	0.602667	0.597796	0.618132	0.614525	0.619318	0.597765	0.603567	0.627286	0.598053	0.621547	0.619178	0.62166	0.6	0.584958	0.589708	0.627235	0.622721	0.601418	0.61669	0.592047	0.588571	0.60452	0.607703	0.60485	0.596182	0.64	0.603221
0.5509554	0.58296	0.611833	0.598025	0.61295	0.580175	0.614743	0.615819	0.627503	0.607764	0.600544	0.599168	0.615599	0.614966	0.616667	0.591512	0.622517	0.617219	0.605578	0.636485	0.598425	0.607895	0.607427	0.609499	0.591281	0.616848	0.607735	0.61236	0.60221	0.602442	0.625869	0.599725	0.636612	0.607046	0.625869	0.617886	0.597796	0.61348	0.636735	0.629681	0.597476	0.623776	0.596798	0.584746	0.592179	0.614951	0.606488	0.597968	0.641243	0.610709
0.5632000	0.582583	0.605797	0.620397	0.621387	0.591508	0.614525	0.615603	0.630027	0.610215	0.622101	0.610028	0.618182	0.622951	0.619247	0.604527	0.632979	0.62234	0.610667	0.644385	0.616601	0.610304	0.604527	0.603974	0.607387	0.62483	0.610263	0.626234	0.610263	0.599455	0.631285	0.607735	0.631001	0.628571	0.622905	0.620408	0.603043	0.618784	0.63388	0.635097	0.602817	0.632023	0.611111	0.598582	0.611501	0.611898	0.611898	0.597668	0.641135	0.619186
0.5633803	0.588235	0.610796	0.611111	0.620397	0.599713	0.635616	0.645341	0.639474	0.620053	0.618474	0.614754	0.60631	0.61126	0.621067	0.593464	0.634465	0.62141	0.609948	0.645669	0.600259	0.601816	0.601307	0.605982	0.609396	0.626506	0.612245	0.630705	0.612245	0.614973	0.643836	0.607046	0.635262	0.614152	0.624657	0.622163	0.610583	0.612466	0.627346	0.63388	0.621547	0.630854	0.610315	0.603616	0.610729	0.613889	0.616667	0.597143	0.664812	0.626781
0.5425361	0.572289	0.604651	0.602273	0.614493	0.596182	0.621849	0.628734	0.637097	0.633423	0.604651	0.594972	0.60028	0.613699	0.615385	0.58745	0.634667	0.613333	0.609626	0.632708	0.594452	0.598676	0.58745	0.605578	0.614541	0.615595	0.600835	0.625177	0.606398	0.601093	0.638656	0.590028	0.618982	0.60573	0.619048	0.603001	0.596394	0.590028	0.613699	0.636872	0.596045	0.628169	0.601173	0.583215	0.610408	0.619318	0.605114	0.584795	0.645804	0.626822
0.5727848	0.591382	0.625538	0.617111	0.626609	0.6	0.633472	0.648876	0.653386	0.628495	0.624324	0.623448	0.620499	0.627876	0.635359	0.593668	0.650856	0.624506	0.620872	0.643709	0.608355	0.612565	0.609499	0.614173	0.620596	0.637838	0.623626	0.642458	0.615385	0.623482	0.64177	0.604651	0.638587	0.619946	0.625173	0.628032	0.613699	0.615595	0.635995	0.634483	0.6053	0.645341	0.625181	0.617977	0.602778	0.633941	0.619916	0.600289	0.654494	0.627338
0.5391850	0.571429	0.611664	0.611961	0.607092	0.574713	0.620027	0.637883	0.637681	0.615588	0.608579	0.612859	0.615385	0.612081	0.627397	0.58377	0.635294	0.630065	0.605505	0.638633	0.598446	0.61039	0.602094	0.591146	0.596774	0.613941	0.613079	0.626039	0.604905	0.607764	0.639232	0.594301	0.636119	0.617647	0.622771	0.614973	0.603261	0.602442	0.622819	0.642955	0.605809	0.642759	0.608321	0.610028	0.603306	0.620306	0.617524	0.595136	0.660167	0.616263
0.5571659	0.592145	0.618076	0.618234	0.625	0.597938	0.632023	0.64194	0.644205	0.621622	0.620027	0.613445	0.62166	0.612637	0.636746	0.589023	0.636364	0.625668	0.616622	0.639785	0.601325	0.61089	0.610442	0.596538	0.610729	0.641975	0.6053	0.62695	0.610879	0.616438	0.623595	0.602778	0.64	0.618331	0.620787	0.618331	0.603616	0.613889	0.634615	0.644258	0.611898	0.644068	0.620588	0.607703	0.600846	0.621083	0.606838	0.595308	0.656205	0.619883
0.5653595	0.572741	0.614476	0.620491	0.624448	0.60597	0.614509	0.630058	0.622101	0.621067	0.611111	0.595745	0.609687	0.609179	0.619318	0.585366	0.633288	0.614344	0.613297	0.631293	0.605898	0.604839	0.596206	0.595687	0.598886	0.622222	0.596045	0.623563	0.596045	0.601942	0.623044	0.587904	0.625698	0.601108	0.614509	0.598338	0.577465	0.585091	0.609179	0.624113	0.599713	0.623748	0.599106	0.604046	0.585714	0.611833	0.608947	0.585438	0.65896	0.619259
0.5446009	0.558824	0.585227	0.605556	0.620397	0.56528	0.613699	0.603616	0.631579	0.622691	0.615796	0.60929	0.60631	0.595174	0.599179	0.588235	0.629243	0.613577	0.60733	0.645669	0.602846	0.609598	0.593464	0.592978	0.585235	0.613119	0.614966	0.630705	0.606803	0.604278	0.638356	0.593496	0.640646	0.608812	0.621918	0.608812	0.594301	0.598916	0.621984	0.628415	0.610497	0.639119	0.604584	0.586926	0.602476	0.619444	0.608333	0.582857	0.650904	0.615385
0.5445860	0.571002	0.617605	0.614951	0.618705	0.588921	0.614743	0.627119	0.627503	0.626506	0.600544	0.590846	0.607242	0.606803	0.602778	0.594164	0.633113	0.614569	0.61089	0.639148	0.603675	0.610526	0.599469	0.604222	0.60218	0.61413	0.607735	0.617977	0.599448	0.613297	0.623088	0.594223	0.625683	0.598916	0.606398	0.617886	0.589532	0.605227	0.623129	0.624133	0.608696	0.612587	0.593886	0.590395	0.597765	0.609309	0.603667	0.583454	0.655367	0.628075
0.5596184	0.567164	0.610951	0.605634	0.614942	0.570597	0.6	0.623413	0.624	0.614973	0.60787	0.603878	0.611961	0.605978	0.621359	0.580133	0.637566	0.616402	0.604774	0.638298	0.602883	0.607096	0.598676	0.603426	0.590476	0.60787	0.612414	0.614306	0.593103	0.596206	0.625	0.574176	0.638472	0.608931	0.619444	0.600812	0.596974	0.598901	0.622283	0.628809	0.596639	0.628492	0.601744	0.5811	0.6053	0.605634	0.605634	0.585507	0.634697	0.604046
0.5480315	0.576923	0.611429	0.592179	0.603989	0.582973	0.619835	0.618182	0.621693	0.623342	0.605653	0.598901	0.612414	0.614555	0.607978	0.588699	0.643045	0.614173	0.613158	0.635884	0.603381	0.61017	0.60184	0.60915	0.601889	0.621803	0.610123	0.628651	0.599179	0.607527	0.639119	0.59673	0.625169	0.620134	0.61708	0.614765	0.597544	0.621253	0.630728	0.623626	0.608333	0.620499	0.596542	0.593007	0.605809	0.611732	0.611732	0.586207	0.640559	0.616046
0.5552050	0.565926	0.612303	0.598601	0.60485	0.575144	0.612414	0.62465	0.617219	0.616202	0.606469	0.610729	0.610497	0.612686	0.619835	0.586842	0.630749	0.617608	0.603426	0.634082	0.609375	0.603133	0.589474	0.60733	0.586487	0.625337	0.60274	0.615599	0.605479	0.605653	0.623448	0.597544	0.623306	0.612903	0.615172	0.612903	0.595628	0.608458	0.62888	0.621733	0.598053	0.629681	0.594517	0.588235	0.598338	0.604196	0.60979	0.604317	0.641457	0.611191
0.5445860	0.565022	0.600289	0.583921	0.610072	0.568513	0.617524	0.615819	0.635514	0.605087	0.603261	0.588072	0.598886	0.614966	0.611111	0.583554	0.630464	0.61192	0.605578	0.639148	0.614173	0.597368	0.586207	0.60686	0.599455	0.611413	0.610497	0.617977	0.607735	0.588874	0.628651	0.583219	0.622951	0.617886	0.614743	0.601626	0.592287	0.602476	0.62585	0.624133	0.597476	0.618182	0.585153	0.579096	0.603352	0.626234	0.600846	0.586357	0.621469	0.60492
0.5235772	0.548781	0.585294	0.58046	0.592375	0.546805	0.589235	0.604317	0.608696	0.59673	0.591978	0.584746	0.58156	0.587258	0.591231	0.558705	0.595687	0.595687	0.583784	0.601626	0.574099	0.564926	0.566802	0.577181	0.571429	0.591978	0.579465	0.60372	0.571027	0.571823	0.611898	0.571429	0.603616	0.601379	0.586402	0.582069	0.56662	0.582633	0.595568	0.59887	0.568571	0.595442	0.5727	0.581295	0.566145	0.591954	0.577586	0.571006	0.618705	0.60767
0.5367412	0.569715	0.599132	0.588402	0.617605	0.593567	0.60251	0.614731	0.613119	0.61745	0.60218	0.603616	0.594972	0.603001	0.607242	0.571809	0.613546	0.61089	0.60719	0.619493	0.602632	0.598945	0.593085	0.595238	0.5847	0.613079	0.603878	0.614085	0.595568	0.598639	0.624826	0.582069	0.632877	0.603261	0.610879	0.605978	0.588398	0.593103	0.613915	0.634214	0.587904	0.631136	0.589781	0.592068	0.593838	0.611032	0.605375	0.588064	0.645892	0.624093
0.5466238	0.558069	0.593886	0.605974	0.612482	0.570588	0.608696	0.623932	0.627187	0.620783	0.621918	0.615385	0.606742	0.620027	0.605042	0.612299	0.627503	0.608812	0.623829	0.638926	0.603175	0.612732	0.596257	0.619681	0.618132	0.632877	0.62117	0.620397	0.601671	0.599179	0.619916	0.596394	0.628099	0.625683	0.608696	0.622951	0.602778	0.610263	0.620027	0.629371	0.596888	0.626234	0.625551	0.60114	0.611268	0.623044	0.617354	0.594436	0.62963	0.616058
0.5443038	0.564636	0.591105	0.597476	0.597997	0.547826	0.605809	0.609551	0.629482	0.625832	0.597297	0.595862	0.601108	0.600812	0.599448	0.593668	0.629776	0.608696	0.615588	0.635762	0.597911	0.612565	0.593668	0.598425	0.604336	0.608108	0.601648	0.603352	0.604396	0.601889	0.61964	0.593707	0.630435	0.601078	0.611342	0.603774	0.591781	0.604651	0.61705	0.631724	0.610879	0.606398	0.590449	0.58427	0.588889	0.614306	0.603086	0.574315	0.646067	0.607194
0.5451713	0.576867	0.611032	0.605809	0.617772	0.577143	0.62483	0.631579	0.636959	0.638633	0.610667	0.609524	0.620219	0.619493	0.618529	0.604167	0.647594	0.613784	0.625815	0.645752	0.621134	0.625323	0.611979	0.61658	0.609626	0.621333	0.623306	0.619835	0.620596	0.612517	0.6412	0.601889	0.63807	0.62234	0.613915	0.619681	0.605405	0.612686	0.627503	0.642177	0.616231	0.620027	0.60485	0.595568	0.610959	0.630705	0.622407	0.600284	0.65651	0.615603
0.5523810	0.584203	0.601439	0.607595	0.628408	0.581395	0.626907	0.625352	0.639148	0.627503	0.620596	0.61964	0.616667	0.616011	0.609418	0.603175	0.626156	0.602378	0.622517	0.648074	0.612565	0.614173	0.611111	0.613158	0.611413	0.615176	0.61157	0.621849	0.62259	0.619756	0.629681	0.59808	0.632153	0.616216	0.624133	0.624324	0.612637	0.620027	0.618725	0.630705	0.612587	0.608089	0.597968	0.594366	0.601671	0.627286	0.624473	0.602026	0.650704	0.626263
0.5295056	0.562874	0.586705	0.612994	0.631124	0.566423	0.62117	0.619519	0.63369	0.616622	0.612245	0.611111	0.610879	0.599455	0.603616	0.581673	0.623342	0.607427	0.606383	0.637333	0.609724	0.606061	0.594954	0.597094	0.592087	0.612245	0.605809	0.62166	0.61964	0.616848	0.629526	0.592287	0.629275	0.618725	0.62117	0.613297	0.606897	0.62259	0.610354	0.619444	0.609551	0.616247	0.603499	0.588402	0.618182	0.624294	0.621469	0.598837	0.653465	0.617391
0.5463259	0.575712	0.60492	0.605375	0.620491	0.570175	0.635983	0.626062	0.64257	0.630872	0.610354	0.614743	0.617318	0.608458	0.604457	0.598404	0.621514	0.600266	0.617843	0.638184	0.607895	0.620053	0.595745	0.611111	0.603825	0.604905	0.617729	0.619718	0.612188	0.609524	0.630405	0.604138	0.641096	0.625	0.627615	0.622283	0.616022	0.617931	0.611187	0.639777	0.607595	0.603086	0.60146	0.597734	0.610644	0.630834	0.628006	0.60262	0.648725	0.635704
0.5695793	0.594841	0.606149	0.609442	0.618978	0.58284	0.617772	0.618911	0.622463	0.626866	0.597796	0.610408	0.621469	0.623448	0.619718	0.623656	0.628188	0.614765	0.613728	0.650472	0.603723	0.624	0.610215	0.614973	0.616022	0.630854	0.613445	0.632479	0.613445	0.61348	0.626234	0.613668	0.639889	0.612637	0.620592	0.623626	0.614525	0.610879	0.623448	0.632911	0.614509	0.609929	0.599705	0.60745	0.611898	0.620887	0.632332	0.600884	0.65043	0.628487
0.5616883	0.581431	0.60793	0.605452	0.632504	0.611276	0.619519	0.632184	0.632293	0.623129	0.616022	0.606488	0.626062	0.64177	0.635593	0.606469	0.654105	0.627187	0.634278	0.638701	0.624	0.625668	0.609164	0.619303	0.620499	0.643646	0.617977	0.642857	0.617977	0.615172	0.64215	0.615385	0.641667	0.61708	0.625177	0.61157	0.616247	0.626573	0.627939	0.637518	0.630528	0.617354	0.613333	0.612069	0.625	0.637016	0.631277	0.611521	0.658046	0.633284
0.5331126	0.548837	0.588939	0.586861	0.599106	0.567976	0.581295	0.599415	0.601379	0.594744	0.58427	0.588235	0.590778	0.59353	0.583333	0.572603	0.604651	0.588235	0.595336	0.616231	0.566396	0.586956	0.569863	0.580381	0.577465	0.603933	0.594286	0.610465	0.585714	0.57784	0.598561	0.583215	0.607345	0.591036	0.581295	0.579832	0.589744	0.583215	0.596343	0.602583	0.595065	0.587554	0.594268	0.584795	0.580925	0.592701	0.589781	0.571429	0.616959	0.5997
0.5430464	0.570543	0.600897	0.60438	0.622951	0.58006	0.598561	0.616959	0.615172	0.614108	0.595506	0.602583	0.599424	0.601969	0.597701	0.572603	0.615595	0.593707	0.609054	0.616231	0.593496	0.600544	0.586301	0.583106	0.585916	0.609551	0.608571	0.625	0.588571	0.586255	0.621583	0.600284	0.627119	0.621849	0.61295	0.602241	0.598291	0.605974	0.618847	0.628408	0.624093	0.60492	0.609351	0.608187	0.606936	0.613139	0.613139	0.589474	0.640351	0.608696
0.5570033	0.589313	0.600884	0.598561	0.613803	0.580357	0.587234	0.602306	0.612245	0.619372	0.587258	0.605375	0.602273	0.604716	0.597734	0.597297	0.618084	0.604588	0.608931	0.626866	0.596257	0.608579	0.586487	0.599462	0.605556	0.606648	0.614085	0.616046	0.6	0.589212	0.629787	0.597476	0.635097	0.599448	0.612766	0.610497	0.601124	0.614306	0.626907	0.628006	0.615165	0.60485	0.600297	0.587896	0.615385	0.610072	0.61295	0.598518	0.639769	0.605613
0.5499182	0.579755	0.600592	0.583815	0.59882	0.58296	0.595442	0.607815	0.603825	0.605479	0.603616	0.610796	0.593438	0.601671	0.600284	0.583446	0.615176	0.598916	0.608696	0.621253	0.590604	0.608344	0.588874	0.607287	0.599721	0.620306	0.622348	0.610072	0.599717	0.591667	0.612536	0.6	0.629371	0.604716	0.615385	0.613037	0.606488	0.622535	0.618384	0.619318	0.612069	0.613181	0.61194	0.596237	0.606581	0.615607	0.615607	0.607143	0.636758	0.614243
0.5297297	0.526846	0.545161	0.562893	0.562701	0.538336	0.520124	0.554331	0.56213	0.551929	0.542986	0.527778	0.539535	0.534743	0.553323	0.534508	0.568915	0.55132	0.547059	0.548673	0.525399	0.547307	0.563877	0.551825	0.553706	0.546003	0.549923	0.550861	0.543779	0.539157	0.557276	0.529052	0.564492	0.574436	0.557276	0.580451	0.532925	0.541284	0.574018	0.570988	0.553125	0.548287	0.547231	0.532284	0.550544	0.544025	0.550315	0.535714	0.563779	0.537217
0.5441696	0.543657	0.564184	0.574961	0.584518	0.567308	0.56621	0.582043	0.57933	0.586861	0.566766	0.561457	0.573171	0.573551	0.574468	0.560694	0.585859	0.568543	0.578871	0.571843	0.548571	0.567335	0.578035	0.560345	0.565476	0.557863	0.558912	0.56	0.546828	0.571852	0.590563	0.547368	0.567164	0.606509	0.572298	0.588757	0.533133	0.538346	0.576523	0.561457	0.540707	0.554365	0.5536	0.544892	0.556575	0.544049	0.559505	0.526316	0.572755	0.569157
0.5319149	0.535537	0.55008	0.573643	0.586371	0.553055	0.540458	0.568323	0.575183	0.57101	0.550595	0.544901	0.571865	0.554396	0.579268	0.55942	0.578871	0.570188	0.563135	0.573508	0.561605	0.563218	0.553623	0.553314	0.546269	0.556548	0.563636	0.583333	0.563636	0.585438	0.583206	0.542986	0.57485	0.590504	0.577099	0.581602	0.534743	0.54902	0.575261	0.560122	0.551618	0.562212	0.545746	0.540373	0.576687	0.548837	0.551938	0.528	0.562112	0.561404
0.5217391	0.538961	0.58125	0.588415	0.5919	0.57188	0.561562	0.59542	0.589081	0.587896	0.579795	0.568862	0.583459	0.58651	0.581709	0.582026	0.592593	0.581197	0.585714	0.581662	0.558533	0.571429	0.579173	0.575886	0.56094	0.573939	0.584203	0.588771	0.581222	0.608187	0.606607	0.569733	0.586156	0.610219	0.597598	0.586861	0.540862	0.557863	0.58651	0.57485	0.563636	0.574018	0.570978	0.552672	0.552036	0.560976	0.557927	0.544025	0.589313	0.583072
0.5392491	0.539075	0.574501	0.590705	0.591118	0.586956	0.573117	0.591592	0.585573	0.592908	0.573487	0.583211	0.591716	0.585859	0.59882	0.581461	0.60028	0.58906	0.587904	0.592384	0.566667	0.579387	0.575843	0.583799	0.554913	0.567723	0.58651	0.58209	0.56305	0.592806	0.593796	0.569343	0.591304	0.606322	0.587888	0.586207	0.54386	0.563504	0.594517	0.571429	0.557377	0.564636	0.567442	0.567568	0.560831	0.563718	0.569715	0.540958	0.582583	0.560863
0.5612245	0.565978	0.588055	0.597907	0.613741	0.591331	0.57732	0.601796	0.609309	0.605375	0.597701	0.587372	0.60767	0.592806	0.605882	0.591036	0.598601	0.584615	0.60028	0.59353	0.556787	0.583333	0.585434	0.571031	0.553314	0.571839	0.599415	0.604167	0.581871	0.599713	0.612666	0.576419	0.606936	0.618911	0.603829	0.610315	0.574344	0.570597	0.589928	0.578561	0.567608	0.586667	0.581144	0.577844	0.568047	0.576981	0.576981	0.5547	0.586826	0.565284
0.5432937	0.555556	0.577982	0.597015	0.594512	0.590417	0.588235	0.606876	0.597183	0.59322	0.579627	0.57478	0.592047	0.58046	0.578561	0.581818	0.578212	0.581006	0.579832	0.578652	0.564315	0.568655	0.576224	0.573018	0.552518	0.571019	0.586861	0.585438	0.563504	0.581662	0.585294	0.561047	0.585859	0.612303	0.579412	0.586552	0.544396	0.543605	0.574713	0.557185	0.563798	0.556213	0.552469	0.562033	0.555391	0.561194	0.579105	0.563077	0.58296	0.558282
0.5442404	0.54375	0.572289	0.591176	0.591592	0.56621	0.565217	0.580265	0.580556	0.582173	0.571429	0.566474	0.586357	0.586402	0.581766	0.584828	0.584022	0.578512	0.571823	0.581717	0.562074	0.577291	0.576552	0.584362	0.564539	0.571429	0.595684	0.585651	0.572662	0.579096	0.602899	0.56447	0.57468	0.617772	0.571014	0.5811	0.548063	0.558739	0.569405	0.549133	0.555556	0.556851	0.541033	0.539028	0.561863	0.547059	0.570588	0.545454	0.574374	0.558912
0.5418060	0.528952	0.576169	0.597938	0.604511	0.579268	0.56894	0.59587	0.600835	0.60251	0.597734	0.590449	0.610465	0.587234	0.602899	0.577348	0.601379	0.587586	0.594744	0.601942	0.568306	0.586301	0.58011	0.585165	0.556818	0.597734	0.587896	0.615836	0.585014	0.594059	0.609579	0.588235	0.612536	0.621469	0.609579	0.612994	0.571839	0.573888	0.584397	0.578871	0.568082	0.578102	0.575342	0.569322	0.57726	0.568483	0.580265	0.549317	0.581121	0.568835
0.5647059	0.556604	0.6	0.600592	0.607251	0.584992	0.591837	0.607407	0.597765	0.602241	0.58037	0.587209	0.60146	0.595442	0.590975	0.601942	0.612188	0.595568	0.619444	0.604457	0.562414	0.596974	0.599168	0.590345	0.564907	0.58606	0.60492	0.615611	0.590449	0.596591	0.609329	0.599424	0.609442	0.629787	0.606414	0.601418	0.585859	0.582133	0.603989	0.598837	0.6	0.571847	0.568807	0.580741	0.573939	0.571006	0.594675	0.570122	0.601482	0.592705
0.5650685	0.5536	0.585516	0.589474	0.611367	0.5919	0.601482	0.605422	0.595745	0.611664	0.601156	0.59675	0.599406	0.60492	0.58284	0.605634	0.604782	0.596343	0.609309	0.605375	0.562674	0.589386	0.591549	0.610644	0.571014	0.598266	0.602941	0.607784	0.591176	0.591631	0.619259	0.58858	0.604651	0.62536	0.61037	0.590778	0.57478	0.576867	0.602026	0.590842	0.591928	0.5693	0.575428	0.578313	0.568452	0.577444	0.601504	0.564341	0.587349	0.574961
0.5442404	0.540625	0.572289	0.576471	0.594595	0.569254	0.573913	0.600884	0.588889	0.587744	0.571429	0.569364	0.597968	0.572238	0.581766	0.576552	0.586777	0.592287	0.604972	0.578947	0.553888	0.574555	0.582069	0.573388	0.544681	0.579915	0.595684	0.585651	0.57554	0.579096	0.597101	0.578797	0.59175	0.609309	0.597101	0.589563	0.568149	0.578797	0.594901	0.586705	0.578947	0.574344	0.571429	0.568483	0.567686	0.558824	0.573529	0.551515	0.574374	0.558912
0.5360134	0.554859	0.589124	0.60177	0.593373	0.583206	0.569767	0.605613	0.590529	0.614525	0.587234	0.585507	0.605531	0.585227	0.58926	0.589212	0.59116	0.59116	0.612188	0.580556	0.569083	0.581619	0.580913	0.577717	0.560455	0.592908	0.603175	0.587372	0.594517	0.592068	0.613372	0.606322	0.596291	0.622348	0.598837	0.605375	0.572662	0.574713	0.599432	0.57971	0.568915	0.573099	0.582317	0.584933	0.586861	0.572271	0.59292	0.574468	0.593796	0.566667
0.5335570	0.540031	0.580938	0.576071	0.585219	0.571865	0.567686	0.576923	0.594142	0.598601	0.576704	0.571843	0.588921	0.56899	0.575581	0.570637	0.578147	0.567082	0.582524	0.564673	0.558904	0.563187	0.567867	0.567493	0.547009	0.556818	0.595376	0.594118	0.563584	0.584397	0.582242	0.578417	0.574286	0.611898	0.585153	0.594901	0.553314	0.552518	0.58037	0.563135	0.558003	0.559297	0.564886	0.56213	0.549708	0.567208	0.573117	0.554033	0.573964	0.570562
0.5562914	0.548837	0.591928	0.59562	0.602086	0.586103	0.57554	0.605263	0.612414	0.611342	0.575843	0.576758	0.602306	0.576653	0.597701	0.589041	0.582763	0.596443	0.595336	0.580468	0.574526	0.578804	0.580822	0.572207	0.560563	0.578652	0.617143	0.601744	0.58	0.597476	0.604317	0.600284	0.60452	0.62465	0.601439	0.607843	0.566952	0.57468	0.599156	0.585366	0.574746	0.587554	0.591252	0.578947	0.583815	0.583942	0.589781	0.586466	0.578947	0.569715
0.5324459	0.538941	0.582583	0.583578	0.58982	0.582701	0.569364	0.599119	0.587258	0.6	0.583921	0.579251	0.596237	0.587571	0.588745	0.58597	0.585165	0.590659	0.603306	0.58011	0.563265	0.570259	0.58597	0.580027	0.554455	0.572638	0.591105	0.59854	0.582496	0.588732	0.606936	0.588571	0.587234	0.62166	0.592485	0.59353	0.563662	0.565714	0.587571	0.567723	0.556851	0.55814	0.563636	0.56975	0.554427	0.557185	0.568915	0.546828	0.584435	0.563253
0.5601318	0.549383	0.577381	0.578488	0.593472	0.577444	0.558739	0.596798	0.587912	0.597796	0.584615	0.585714	0.596844	0.585434	0.592275	0.578445	0.583106	0.577657	0.592896	0.580822	0.561404	0.573748	0.581173	0.583446	0.56101	0.573427	0.577525	0.587554	0.577525	0.589386	0.590258	0.583569	0.579465	0.613668	0.581662	0.599721	0.550355	0.535411	0.57423	0.568571	0.557804	0.556196	0.546547	0.547307	0.561151	0.563953	0.569767	0.553892	0.570597	0.576119
0.5383361	0.544342	0.587021	0.602306	0.614706	0.593145	0.579546	0.614719	0.621253	0.631147	0.599168	0.597734	0.614509	0.605556	0.598582	0.595399	0.589189	0.610811	0.620596	0.595109	0.572959	0.593289	0.592693	0.597577	0.5758	0.590846	0.631876	0.622669	0.600846	0.598338	0.633523	0.61236	0.610879	0.625173	0.607954	0.616874	0.596343	0.581461	0.613889	0.597734	0.578797	0.591429	0.60119	0.594517	0.582026	0.587896	0.582133	0.566766	0.600289	0.585799
0.5388430	0.547988	0.567164	0.57726	0.60119	0.585219	0.586207	0.586861	0.600551	0.604972	0.597476	0.581662	0.595684	0.573034	0.593974	0.569083	0.579235	0.571038	0.6	0.57967	0.55751	0.575305	0.588235	0.579592	0.548523	0.575035	0.601997	0.592163	0.596291	0.59944	0.606322	0.59375	0.609309	0.587413	0.612069	0.601399	0.5633	0.559659	0.58427	0.581662	0.562319	0.569364	0.578313	0.563504	0.551227	0.574344	0.571429	0.555556	0.563504	0.547904
0.5271829	0.530864	0.577381	0.59593	0.602374	0.577444	0.593123	0.60262	0.607143	0.619835	0.59021	0.594286	0.605452	0.593838	0.595136	0.597544	0.588556	0.591281	0.603825	0.591781	0.580297	0.592693	0.583902	0.58616	0.56101	0.59021	0.611664	0.60492	0.583215	0.606145	0.627507	0.600567	0.616034	0.633194	0.601719	0.619247	0.58156	0.572238	0.59944	0.585714	0.575144	0.585014	0.591592	0.573508	0.595684	0.587209	0.587209	0.571856	0.567686	0.564179
0.5601318	0.564815	0.58631	0.598837	0.611276	0.595489	0.593123	0.614265	0.623626	0.61708	0.593007	0.577143	0.602583	0.591036	0.609442	0.583902	0.594005	0.588556	0.612022	0.59726	0.569501	0.584574	0.603001	0.580733	0.5554	0.598601	0.608819	0.628075	0.611664	0.617318	0.624642	0.597734	0.62166	0.619247	0.618911	0.619247	0.587234	0.583569	0.610644	0.597143	0.598266	0.602306	0.597598	0.590975	0.592806	0.584302	0.604651	0.586826	0.599709	0.591045
0.5383361	0.544342	0.566372	0.576369	0.579412	0.578241	0.588068	0.603175	0.583106	0.598361	0.590846	0.572238	0.588905	0.591667	0.592908	0.573748	0.591892	0.57027	0.601626	0.581522	0.564926	0.593289	0.595399	0.594886	0.5758	0.588072	0.600846	0.599713	0.5811	0.603878	0.605114	0.589888	0.591353	0.611342	0.588068	0.594744	0.562588	0.564607	0.6	0.586402	0.547278	0.548571	0.574405	0.565657	0.56776	0.559078	0.567723	0.560831	0.571429	0.571006
0.5709459	0.552923	0.587519	0.591382	0.591806	0.603077	0.57101	0.610119	0.60028	0.607595	0.602857	0.589781	0.601173	0.600858	0.593567	0.576602	0.589708	0.586926	0.6053	0.587413	0.567493	0.588398	0.5961	0.592798	0.573066	0.577143	0.59593	0.585799	0.584302	0.601997	0.594436	0.599132	0.600575	0.603989	0.606149	0.609687	0.565217	0.558611	0.597997	0.575183	0.567208	0.571429	0.574501	0.580357	0.567647	0.585438	0.582467	0.578867	0.589286	0.583206
0.5433333	0.542902	0.580451	0.596182	0.611694	0.598784	0.587554	0.6	0.60749	0.603616	0.60452	0.580087	0.597101	0.599717	0.598266	0.581267	0.588721	0.580468	0.595862	0.583679	0.564033	0.590164	0.586777	0.589041	0.566572	0.567797	0.58046	0.602339	0.563218	0.589563	0.590449	0.58083	0.59375	0.608451	0.60492	0.614085	0.567335	0.55794	0.602546	0.559885	0.578102	0.576419	0.567527	0.558824	0.55814	0.578561	0.575624	0.568835	0.564706	0.582202
0.5473322	0.549839	0.585139	0.574018	0.604938	0.57903	0.583333	0.605144	0.618234	0.608571	0.592163	0.590504	0.596125	0.584302	0.591382	0.560113	0.584746	0.579096	0.597734	0.582386	0.556643	0.57784	0.591231	0.599156	0.567686	0.56894	0.567208	0.601504	0.555391	0.568116	0.592262	0.567647	0.59854	0.599132	0.60119	0.60492	0.565538	0.558824	0.598837	0.5727	0.591592	0.583832	0.578125	0.568835	0.562033	0.574018	0.570997	0.560748	0.586989	0.565217
0.5618729	0.550861	0.597285	0.603829	0.610526	0.60061	0.577649	0.613569	0.609179	0.613668	0.600567	0.573083	0.59593	0.604255	0.597101	0.582873	0.590345	0.57931	0.59751	0.59362	0.562841	0.572603	0.577348	0.57967	0.559659	0.580736	0.59366	0.624633	0.576369	0.596888	0.600871	0.593974	0.60114	0.615819	0.606676	0.61017	0.583333	0.556671	0.595745	0.578871	0.579795	0.583942	0.572298	0.578171	0.553936	0.580265	0.580265	0.567527	0.587021	0.593041
0.5645161	0.559758	0.59562	0.576319	0.596798	0.58997	0.587904	0.608571	0.604588	0.611637	0.601648	0.58906	0.6	0.596974	0.598315	0.589812	0.605087	0.60241	0.606711	0.589502	0.570292	0.601064	0.605898	0.602667	0.573003	0.585165	0.608939	0.602273	0.578212	0.592593	0.610408	0.589708	0.599448	0.624657	0.604782	0.605479	0.587744	0.573018	0.599725	0.569425	0.58156	0.579915	0.565538	0.548571	0.570622	0.576319	0.579173	0.581498	0.588571	0.600293
0.5686275	0.56049	0.579025	0.577201	0.589102	0.585075	0.588905	0.589595	0.594816	0.599179	0.597222	0.584397	0.60114	0.606398	0.59375	0.582656	0.606225	0.592693	0.610583	0.593197	0.579089	0.599462	0.598916	0.603774	0.573816	0.577778	0.601695	0.591954	0.590395	0.596394	0.614509	0.59353	0.603352	0.623269	0.59175	0.603878	0.594366	0.579465	0.620306	0.575886	0.573888	0.575107	0.566319	0.554913	0.568571	0.568543	0.577201	0.57058	0.592485	0.592593
0.5279188	0.518987	0.570122	0.5625	0.577508	0.560863	0.56305	0.587183	0.573034	0.577465	0.566524	0.555556	0.575624	0.581662	0.565154	0.563459	0.579387	0.573816	0.581006	0.554622	0.548965	0.567082	0.566248	0.560333	0.548063	0.572246	0.573508	0.580741	0.561863	0.577143	0.577713	0.568116	0.57554	0.613409	0.577713	0.593438	0.563135	0.547826	0.567335	0.549708	0.56213	0.575221	0.553846	0.539493	0.544919	0.559524	0.559524	0.56135	0.575261	0.562691
0.5510204	0.54054	0.591118	0.594918	0.601527	0.578947	0.571429	0.60479	0.614951	0.605375	0.591954	0.581498	0.584071	0.584173	0.588235	0.579832	0.593007	0.593007	0.605891	0.590717	0.559557	0.572222	0.582633	0.579387	0.556196	0.560345	0.584795	0.598214	0.581871	0.591105	0.597938	0.590975	0.592485	0.616046	0.603829	0.610315	0.565598	0.561863	0.598561	0.575624	0.579495	0.568889	0.565688	0.568862	0.559172	0.588939	0.576981	0.567026	0.577844	0.580645
0.5633333	0.546022	0.577444	0.593245	0.587706	0.577508	0.555716	0.591176	0.585298	0.598053	0.601695	0.600289	0.6	0.599717	0.583815	0.584022	0.594223	0.574966	0.598621	0.591978	0.553133	0.587432	0.581267	0.591781	0.569405	0.576271	0.591954	0.587719	0.571839	0.598025	0.602026	0.597997	0.59375	0.608451	0.590449	0.616901	0.570201	0.563662	0.591231	0.580087	0.563504	0.564774	0.561457	0.547059	0.572674	0.566813	0.56975	0.562784	0.567647	0.582202
0.5350734	0.544342	0.569322	0.576369	0.594118	0.587183	0.565341	0.588745	0.594005	0.601093	0.585298	0.575071	0.58606	0.569444	0.57305	0.565629	0.581081	0.57027	0.596206	0.57337	0.556894	0.58255	0.584574	0.584118	0.553547	0.568655	0.595205	0.596844	0.569817	0.592798	0.596591	0.595506	0.591353	0.611342	0.596591	0.59751	0.579465	0.587079	0.588889	0.577904	0.581662	0.571429	0.559524	0.556999	0.570613	0.567723	0.582133	0.569733	0.588745	0.579882
0.5601318	0.552469	0.589286	0.590116	0.596439	0.601504	0.578797	0.60262	0.607143	0.608815	0.604196	0.591429	0.591105	0.59944	0.60372	0.58663	0.607629	0.585831	0.60929	0.589041	0.5722	0.581867	0.578445	0.58616	0.57223	0.584615	0.605974	0.60492	0.571835	0.597765	0.604584	0.597734	0.616034	0.624826	0.595989	0.599721	0.590071	0.594901	0.602241	0.594286	0.578035	0.576369	0.570571	0.573508	0.566906	0.581395	0.587209	0.577844	0.596798	0.591045
0.5594640	0.567398	0.583082	0.578171	0.587349	0.580153	0.55814	0.590842	0.587744	0.589386	0.590071	0.585507	0.582242	0.59375	0.58926	0.580913	0.585635	0.582873	0.587258	0.572222	0.569083	0.567901	0.569848	0.574966	0.55192	0.570213	0.591631	0.602056	0.577201	0.577904	0.593023	0.568966	0.593438	0.591231	0.587209	0.588402	0.578417	0.568966	0.588068	0.576812	0.568915	0.561404	0.542683	0.543575	0.566423	0.566372	0.569322	0.541033	0.602659	0.581818
0.5589661	0.560606	0.581871	0.6	0.603499	0.590842	0.583099	0.615165	0.605405	0.620596	0.607978	0.598315	0.603667	0.603306	0.599156	0.585235	0.608579	0.595174	0.615591	0.592992	0.568393	0.585885	0.58792	0.598131	0.57931	0.58597	0.604196	0.611664	0.581818	0.593407	0.616901	0.604457	0.605809	0.625514	0.602817	0.609054	0.591353	0.584958	0.61157	0.598315	0.582386	0.586402	0.572271	0.566524	0.582744	0.574286	0.582857	0.561765	0.592275	0.59824
0.5589226	0.55748	0.561457	0.574815	0.580938	0.57362	0.566423	0.587537	0.587413	0.586255	0.578348	0.576419	0.570175	0.582026	0.580175	0.572222	0.590846	0.565881	0.589708	0.580195	0.546703	0.570248	0.577778	0.582873	0.557143	0.566952	0.585507	0.58997	0.55942	0.58606	0.586861	0.588745	0.587393	0.610796	0.589781	0.590909	0.566474	0.565657	0.584879	0.57933	0.580265	0.549192	0.557427	0.554896	0.571847	0.554074	0.577778	0.564886	0.575668	0.578387
0.5383361	0.547401	0.584071	0.570605	0.594118	0.566319	0.576704	0.591631	0.604905	0.5847	0.59362	0.583569	0.57468	0.575	0.578723	0.576455	0.581081	0.575676	0.585366	0.581522	0.551539	0.571812	0.581867	0.573351	0.545202	0.563107	0.575458	0.591105	0.558533	0.570637	0.582386	0.570225	0.582985	0.616874	0.599432	0.591978	0.562588	0.564607	0.591667	0.575071	0.575931	0.56	0.559524	0.551227	0.582026	0.576369	0.573487	0.569733	0.574315	0.576923
0.5542950	0.559271	0.59824	0.601719	0.602339	0.61037	0.573446	0.61406	0.607046	0.611413	0.615172	0.588732	0.613861	0.604972	0.61213	0.597577	0.607527	0.604839	0.61186	0.591892	0.575233	0.59279	0.597577	0.60241	0.583679	0.587586	0.605891	0.599144	0.57784	0.606061	0.59322	0.592179	0.599168	0.618982	0.60452	0.607978	0.581818	0.586592	0.604972	0.594366	0.584046	0.585227	0.573964	0.568149	0.564539	0.578797	0.581662	0.575221	0.593974	0.597059
0.5568369	0.561728	0.58631	0.578488	0.581602	0.601504	0.561605	0.593886	0.596154	0.589532	0.601399	0.577143	0.608321	0.591036	0.600858	0.583902	0.599455	0.588556	0.587432	0.578082	0.569501	0.579161	0.581173	0.58616	0.569425	0.579021	0.58037	0.58466	0.55192	0.586592	0.584527	0.575071	0.582279	0.596932	0.593123	0.596932	0.57305	0.569405	0.596639	0.574286	0.563584	0.570605	0.546547	0.550218	0.555396	0.572674	0.569767	0.568862	0.582242	0.585075
0.5295110	0.55205	0.565349	0.5727	0.581818	0.580645	0.570175	0.606241	0.593838	0.601124	0.596291	0.600583	0.591508	0.591429	0.578102	0.589708	0.591667	0.577778	0.593315	0.581006	0.569464	0.590345	0.595271	0.600277	0.58083	0.593438	0.597968	0.605613	0.586357	0.606838	0.605263	0.586705	0.599713	0.620199	0.590643	0.59175	0.561505	0.578035	0.588571	0.58309	0.569322	0.555882	0.558282	0.558692	0.566813	0.578635	0.58457	0.565749	0.579495	0.588415
0.5382060	0.550544	0.590705	0.58858	0.603886	0.590909	0.594517	0.607038	0.605809	0.604716	0.580282	0.581295	0.586705	0.583921	0.585014	0.57967	0.592593	0.581619	0.591472	0.584828	0.570652	0.583106	0.587912	0.581967	0.579096	0.585916	0.604584	0.594752	0.581662	0.604782	0.597403	0.584879	0.589235	0.620787	0.582973	0.601124	0.554286	0.562054	0.5811	0.584173	0.588064	0.56894	0.571861	0.560117	0.573913	0.57101	0.582723	0.573152	0.580645	0.589474
0.5316045	0.553191	0.57478	0.56447	0.590643	0.583704	0.562147	0.579627	0.604336	0.584239	0.584828	0.574648	0.577086	0.577348	0.589563	0.565276	0.583333	0.580645	0.590297	0.578378	0.580559	0.576769	0.573351	0.572959	0.564315	0.571035	0.591865	0.582026	0.5554	0.584022	0.590395	0.547486	0.588072	0.596974	0.584746	0.58597	0.537063	0.553073	0.582873	0.574648	0.561254	0.565341	0.553254	0.536585	0.561702	0.550143	0.547278	0.539823	0.559541	0.558824
0.5385935	0.544872	0.57716	0.575301	0.587692	0.586584	0.563798	0.600302	0.588068	0.575499	0.570188	0.56213	0.579495	0.588406	0.58963	0.558533	0.571831	0.56338	0.573446	0.575071	0.549512	0.551049	0.561354	0.56101	0.542816	0.555716	0.574374	0.584708	0.562592	0.583815	0.578635	0.554252	0.573508	0.588745	0.575668	0.559885	0.555066	0.530792	0.556522	0.576923	0.568862	0.558209	0.548287	0.536953	0.551416	0.557229	0.557229	0.549689	0.561086	0.560372
0.5451448	0.547771	0.598159	0.592814	0.59633	0.592248	0.575221	0.626687	0.612994	0.611898	0.601439	0.591176	0.602659	0.605187	0.603829	0.58345	0.579832	0.582633	0.595506	0.569014	0.582524	0.589708	0.591865	0.594142	0.577201	0.572662	0.600293	0.581222	0.57101	0.591954	0.578171	0.565598	0.58466	0.611191	0.59587	0.596844	0.560584	0.571429	0.585014	0.576471	0.568452	0.560831	0.560372	0.548726	0.568889	0.580838	0.583832	0.564815	0.572714	0.578461
0.5600000	0.580343	0.595489	0.604993	0.611694	0.595745	0.590449	0.620588	0.615811	0.611961	0.590395	0.588745	0.602899	0.605375	0.609827	0.600551	0.605227	0.605227	0.612414	0.600277	0.588556	0.595628	0.589532	0.583562	0.580736	0.59887	0.614942	0.614035	0.591954	0.603667	0.613603	0.569385	0.610796	0.605634	0.610709	0.588732	0.581662	0.58083	0.599717	0.603175	0.60146	0.590975	0.585736	0.576471	0.587209	0.581498	0.587372	0.562784	0.582353	0.582202
0.5445205	0.56	0.57319	0.580451	0.583717	0.582554	0.574815	0.60241	0.587234	0.59175	0.592485	0.576071	0.581602	0.581766	0.588757	0.577465	0.57384	0.57384	0.586742	0.571429	0.56546	0.581006	0.574648	0.563025	0.562319	0.572254	0.594118	0.592814	0.567647	0.577201	0.58963	0.57101	0.59593	0.608069	0.586667	0.585014	0.560117	0.57101	0.573083	0.590842	0.565022	0.554396	0.566096	0.551205	0.574405	0.565414	0.565414	0.539535	0.569277	0.57187
0.5429553	0.545746	0.562597	0.573152	0.59168	0.575	0.582467	0.595166	0.588905	0.587732	0.568116	0.565926	0.592262	0.595065	0.587537	0.579096	0.595205	0.578279	0.594059	0.58156	0.578212	0.577031	0.59322	0.564607	0.569767	0.571014	0.60472	0.588589	0.58997	0.599132	0.606241	0.558003	0.597668	0.606936	0.591382	0.580925	0.558824	0.572687	0.580551	0.601482	0.578711	0.568012	0.567863	0.540786	0.573134	0.564103	0.573152	0.541213	0.561933	0.592248
0.5743945	0.575121	0.562986	0.570562	0.592248	0.578616	0.591928	0.601824	0.592275	0.588235	0.58309	0.560358	0.583832	0.586861	0.58806	0.571023	0.58156	0.570213	0.560455	0.579173	0.544944	0.560563	0.576704	0.576271	0.564327	0.568513	0.578635	0.598187	0.557863	0.585153	0.58296	0.555391	0.589443	0.604651	0.588939	0.575581	0.550296	0.558346	0.578102	0.581222	0.567119	0.565414	0.562009	0.544073	0.558559	0.567527	0.564492	0.550861	0.571429	0.589704
0.5699659	0.555024	0.58679	0.593703	0.61562	0.593168	0.581979	0.594595	0.605375	0.612766	0.596542	0.589102	0.594675	0.582973	0.587021	0.58427	0.591865	0.57784	0.590717	0.589563	0.569444	0.579387	0.587079	0.594972	0.557804	0.576369	0.592375	0.591045	0.560117	0.581295	0.593796	0.560584	0.594203	0.594828	0.599705	0.603448	0.54386	0.563504	0.577201	0.57732	0.575261	0.582467	0.555039	0.555556	0.560831	0.566717	0.575712	0.556414	0.558559	0.567026
0.5531915	0.538843	0.581876	0.567442	0.570523	0.59164	0.574046	0.599379	0.569343	0.582723	0.577381	0.56621	0.574924	0.554396	0.576219	0.562319	0.567294	0.573083	0.571843	0.573508	0.541547	0.566092	0.571014	0.576369	0.558209	0.571429	0.59697	0.589506	0.560606	0.564636	0.570992	0.564103	0.586826	0.590504	0.580153	0.590504	0.537764	0.573152	0.587183	0.581431	0.563944	0.568356	0.571429	0.562112	0.555215	0.573643	0.55814	0.5472	0.565217	0.558214
0.5654450	0.553746	0.598746	0.577982	0.596875	0.59588	0.578313	0.603369	0.596542	0.592485	0.578561	0.555556	0.582202	0.561765	0.580451	0.560801	0.582857	0.574286	0.584527	0.577586	0.571429	0.567376	0.572246	0.571835	0.553755	0.56094	0.57997	0.587519	0.556054	0.565982	0.569277	0.565476	0.576071	0.603221	0.581325	0.57101	0.551416	0.556548	0.588235	0.582583	0.559271	0.578788	0.566456	0.572741	0.571861	0.587156	0.571865	0.55836	0.572741	0.569182
0.5352622	0.558923	0.579288	0.570978	0.577419	0.585925	0.583851	0.600316	0.58457	0.589286	0.586989	0.575851	0.597201	0.578788	0.59845	0.562592	0.579412	0.573529	0.572271	0.576923	0.556041	0.563504	0.571429	0.579795	0.555387	0.568835	0.567026	0.590267	0.5547	0.58006	0.574534	0.552147	0.584475	0.591252	0.586956	0.591252	0.556068	0.555215	0.590909	0.578947	0.548589	0.575	0.56536	0.559242	0.542902	0.574133	0.561514	0.550489	0.57188	0.558442
0.5493716	0.571906	0.601286	0.573668	0.576923	0.572358	0.570988	0.602826	0.575221	0.591716	0.589474	0.578461	0.584235	0.572289	0.59168	0.562226	0.578947	0.573099	0.57478	0.567647	0.549928	0.563135	0.57101	0.564774	0.555053	0.562406	0.572741	0.577223	0.542113	0.567568	0.57716	0.545732	0.571861	0.590705	0.580247	0.584708	0.537405	0.542683	0.581325	0.572308	0.551402	0.568323	0.548701	0.543171	0.542636	0.567398	0.564263	0.553398	0.565149	0.554839
0.5704100	0.578073	0.626198	0.595016	0.611465	0.597738	0.592024	0.636505	0.604106	0.608823	0.606876	0.577982	0.599078	0.580838	0.612557	0.573508	0.593023	0.581395	0.57726	0.578947	0.569784	0.582973	0.582242	0.570188	0.587706	0.573991	0.596651	0.607752	0.578387	0.602985	0.592024	0.572727	0.583459	0.608048	0.588957	0.599106	0.561457	0.563636	0.598802	0.590214	0.578947	0.583333	0.574194	0.561623	0.557781	0.5919	0.588785	0.575563	0.583463	0.583333
0.5525847	0.564784	0.594249	0.576324	0.579618	0.581583	0.56135	0.602184	0.57478	0.6	0.58296	0.571865	0.583717	0.562874	0.588055	0.570597	0.572674	0.56686	0.565598	0.567252	0.552518	0.562771	0.561863	0.564399	0.551724	0.573991	0.599696	0.579845	0.554033	0.579105	0.582822	0.572727	0.589474	0.590164	0.592024	0.578241	0.552352	0.557576	0.583832	0.58104	0.578947	0.58642	0.564516	0.555382	0.557781	0.576324	0.570094	0.55627	0.555382	0.544872
0.5531915	0.555372	0.594595	0.570543	0.567353	0.585209	0.561832	0.599379	0.566423	0.582723	0.574405	0.547945	0.562691	0.542474	0.570122	0.565217	0.555716	0.555716	0.563135	0.556041	0.544413	0.560345	0.556522	0.553314	0.537313	0.550595	0.6	0.564815	0.542424	0.561664	0.558779	0.555053	0.571856	0.581602	0.580153	0.563798	0.534743	0.536953	0.5693	0.572298	0.563944	0.565284	0.548957	0.537267	0.552147	0.567442	0.55814	0.544	0.546584	0.542265
0.5576592	0.562701	0.603715	0.586103	0.598765	0.594679	0.583333	0.62935	0.60114	0.602857	0.609579	0.58457	0.608048	0.593023	0.600297	0.582744	0.601695	0.596045	0.592068	0.590909	0.584615	0.58906	0.588402	0.587904	0.573508	0.592163	0.59675	0.604511	0.579025	0.594203	0.589286	0.576471	0.589781	0.602026	0.607143	0.590449	0.568483	0.564706	0.59593	0.58457	0.573574	0.583832	0.5625	0.562784	0.562033	0.607251	0.58006	0.570094	0.568835	0.580745
0.5363322	0.568659	0.612753	0.588771	0.592248	0.606918	0.585949	0.617021	0.595136	0.596844	0.597668	0.5693	0.595808	0.578102	0.59403	0.573864	0.567376	0.587234	0.57468	0.570613	0.561798	0.580282	0.588068	0.573446	0.570175	0.568513	0.587537	0.595166	0.563798	0.599709	0.573991	0.567208	0.583578	0.59593	0.588939	0.581395	0.544379	0.549483	0.586861	0.57228	0.570136	0.568421	0.543171	0.550152	0.546547	0.594841	0.570562	0.56651	0.568389	0.567863
0.5500000	0.558502	0.589474	0.581498	0.593703	0.586626	0.593343	0.611765	0.613037	0.611961	0.590395	0.571429	0.594203	0.577086	0.595376	0.586777	0.583219	0.588721	0.598621	0.57538	0.585831	0.587432	0.603306	0.594521	0.575071	0.596045	0.600575	0.596491	0.571839	0.5811	0.575977	0.572246	0.599432	0.597183	0.602026	0.571831	0.553009	0.55794	0.577086	0.582973	0.583942	0.576419	0.549317	0.561765	0.55814	0.584435	0.578561	0.562784	0.576471	0.576169
0.5408163	0.556439	0.58193	0.57997	0.583206	0.575851	0.580265	0.601796	0.600846	0.596888	0.583333	0.563877	0.58997	0.564029	0.588235	0.563025	0.576224	0.562238	0.57784	0.565401	0.559557	0.566667	0.591036	0.576602	0.54755	0.566092	0.584795	0.607143	0.567252	0.582496	0.571429	0.573508	0.595376	0.593123	0.603829	0.575931	0.545189	0.558952	0.581295	0.575624	0.576523	0.577778	0.559505	0.556886	0.544379	0.573991	0.571002	0.548536	0.55988	0.565284
0.5324232	0.548644	0.592934	0.578711	0.600306	0.583851	0.581979	0.606607	0.596888	0.604255	0.587896	0.571429	0.585799	0.565657	0.587021	0.575843	0.563815	0.575035	0.576653	0.566996	0.547222	0.579387	0.587079	0.586592	0.563584	0.570605	0.595308	0.597015	0.548387	0.584173	0.576071	0.554744	0.576812	0.591954	0.581979	0.574713	0.540936	0.540146	0.571429	0.571429	0.57228	0.558692	0.548837	0.537538	0.534125	0.572714	0.554723	0.537867	0.576577	0.570108
0.5441941	0.579288	0.604361	0.607903	0.583851	0.592126	0.583832	0.596651	0.587393	0.597701	0.589781	0.576119	0.611694	0.584795	0.594918	0.58037	0.579546	0.585227	0.586895	0.562857	0.565401	0.583921	0.59744	0.579915	0.57101	0.586861	0.603269	0.590015	0.573551	0.591837	0.58982	0.571006	0.599119	0.590975	0.60479	0.585153	0.568889	0.571006	0.596491	0.561194	0.574018	0.587349	0.553459	0.557078	0.550376	0.574468	0.595745	0.576802	0.590563	0.575
0.5348837	0.547434	0.584708	0.582723	0.57997	0.59697	0.588745	0.618768	0.594744	0.60749	0.611268	0.592806	0.601156	0.572638	0.596542	0.576923	0.578875	0.587106	0.588721	0.590345	0.570652	0.591281	0.598901	0.595628	0.567797	0.571831	0.60745	0.591837	0.575931	0.596343	0.588745	0.570613	0.603399	0.61236	0.597403	0.606742	0.571429	0.559201	0.586742	0.57554	0.576419	0.580551	0.571861	0.55132	0.556522	0.562226	0.568082	0.570136	0.571847	0.550376
0.5335628	0.553055	0.588235	0.577039	0.595679	0.591549	0.577381	0.599092	0.586895	0.605714	0.603774	0.575668	0.602086	0.584302	0.597325	0.582744	0.579096	0.579096	0.589235	0.588068	0.559441	0.57223	0.591231	0.59353	0.573508	0.586357	0.581979	0.583459	0.555391	0.594203	0.580357	0.570588	0.592701	0.599132	0.598214	0.599132	0.556701	0.555882	0.590116	0.560831	0.558559	0.577844	0.55625	0.550681	0.547085	0.58006	0.570997	0.560748	0.574886	0.555901
0.5430464	0.548837	0.588939	0.592701	0.599106	0.574018	0.564029	0.605263	0.590345	0.591978	0.58427	0.573888	0.599424	0.568214	0.583333	0.572603	0.582763	0.580027	0.592593	0.574966	0.560976	0.565217	0.583562	0.580381	0.566197	0.573034	0.574286	0.581395	0.562857	0.586255	0.58705	0.560455	0.581921	0.588235	0.58705	0.593838	0.547009	0.554765	0.590717	0.568149	0.56894	0.567294	0.54902	0.540936	0.554913	0.572263	0.569343	0.556391	0.576023	0.563718
0.5368249	0.555215	0.58284	0.578035	0.581121	0.57997	0.586895	0.602026	0.590164	0.59726	0.589708	0.576704	0.607703	0.573816	0.58606	0.583446	0.593496	0.582656	0.600544	0.585831	0.579866	0.597577	0.60787	0.593792	0.569038	0.584145	0.582744	0.584173	0.585573	0.597222	0.586895	0.571831	0.587413	0.599168	0.589744	0.604716	0.564175	0.571831	0.607242	0.576704	0.571839	0.581662	0.558209	0.555716	0.552218	0.589595	0.575144	0.568452	0.570188	0.569733
0.5223140	0.544892	0.58806	0.574344	0.589286	0.579186	0.58046	0.60438	0.603306	0.596685	0.586255	0.567335	0.598561	0.575843	0.582496	0.585499	0.587432	0.595628	0.605479	0.57967	0.573748	0.588874	0.607387	0.593197	0.571027	0.580645	0.596291	0.606676	0.590585	0.59944	0.586207	0.582386	0.589563	0.595804	0.591954	0.60979	0.55761	0.568182	0.598315	0.575931	0.562319	0.572254	0.563253	0.548905	0.562771	0.591837	0.568513	0.567568	0.569343	0.565868
0.5421488	0.578947	0.58806	0.580175	0.574405	0.585219	0.568966	0.59562	0.581267	0.596685	0.603086	0.578797	0.598561	0.581461	0.591105	0.580027	0.571038	0.579235	0.59726	0.574176	0.568336	0.58616	0.593707	0.590476	0.568214	0.580645	0.579173	0.56894	0.576319	0.596639	0.571839	0.576704	0.5811	0.595804	0.600575	0.604196	0.549075	0.571023	0.609551	0.567335	0.553623	0.563584	0.545181	0.551825	0.565657	0.571429	0.57726	0.558559	0.569343	0.565868
0.5598651	0.567823	0.580547	0.581602	0.581818	0.577573	0.570175	0.612184	0.585434	0.598315	0.607703	0.591837	0.606149	0.582857	0.592701	0.589708	0.594444	0.583333	0.593315	0.589386	0.552957	0.584828	0.586926	0.586445	0.569385	0.582026	0.58926	0.59675	0.58926	0.603989	0.581871	0.592485	0.599713	0.600284	0.587719	0.600284	0.555716	0.583815	0.6	0.58309	0.575221	0.579412	0.567485	0.555721	0.566813	0.590504	0.578635	0.568807	0.573551	0.579268
0.5297114	0.536508	0.571865	0.570149	0.560976	0.559505	0.547059	0.588939	0.571831	0.584746	0.579627	0.565982	0.594993	0.568966	0.578561	0.573427	0.575419	0.575419	0.577031	0.573034	0.542185	0.574202	0.570629	0.570236	0.566906	0.568149	0.581022	0.573551	0.586861	0.587393	0.576471	0.569767	0.580087	0.58083	0.567647	0.592275	0.544396	0.552326	0.589081	0.568915	0.551929	0.579882	0.54321	0.535127	0.54062	0.558209	0.549254	0.541539	0.562033	0.546012
0.5610561	0.584235	0.599106	0.593886	0.582467	0.584337	0.579627	0.618076	0.607978	0.615172	0.59944	0.592275	0.626437	0.605891	0.613181	0.603825	0.600273	0.60573	0.610123	0.59808	0.57027	0.590786	0.612022	0.611413	0.592697	0.59944	0.598291	0.602899	0.589744	0.612587	0.596844	0.587234	0.608451	0.606145	0.605452	0.597765	0.573864	0.567376	0.622721	0.60372	0.575977	0.580087	0.574436	0.556851	0.559078	0.576419	0.576419	0.557721	0.594752	0.57997
0.5614618	0.581649	0.578711	0.582723	0.571002	0.560606	0.574315	0.589443	0.591978	0.59362	0.585916	0.581295	0.618497	0.598025	0.599424	0.590659	0.589849	0.581619	0.588721	0.584828	0.565217	0.585831	0.601648	0.601093	0.587571	0.583099	0.584527	0.594752	0.578797	0.616034	0.585859	0.584879	0.606232	0.592697	0.608947	0.601124	0.565714	0.576319	0.614951	0.58705	0.567686	0.580551	0.559758	0.560117	0.565217	0.57101	0.579795	0.558069	0.58651	0.589474
0.5593496	0.567073	0.579412	0.589081	0.57478	0.579495	0.569405	0.601439	0.592391	0.594005	0.594744	0.587571	0.604255	0.587258	0.591231	0.582996	0.579515	0.576819	0.602703	0.593496	0.555407	0.583668	0.591093	0.601342	0.57975	0.594744	0.590717	0.589413	0.576653	0.588398	0.583569	0.579832	0.59249	0.604138	0.603399	0.612414	0.563815	0.577031	0.606648	0.570622	0.574286	0.581197	0.557863	0.564029	0.577525	0.568966	0.58046	0.565089	0.57554	0.578171
0.5548173	0.578538	0.590705	0.58858	0.58296	0.575758	0.580087	0.59824	0.603043	0.601942	0.594366	0.581295	0.606936	0.592384	0.599424	0.596154	0.578875	0.592593	0.605227	0.582069	0.570652	0.599455	0.598901	0.592896	0.579096	0.580282	0.593123	0.586006	0.573066	0.59353	0.591631	0.587732	0.597734	0.601124	0.597403	0.601124	0.565714	0.56776	0.589563	0.572662	0.588064	0.583454	0.559758	0.545454	0.57971	0.562226	0.57101	0.573152	0.580645	0.574436
0.5388430	0.55418	0.579105	0.571429	0.568452	0.567119	0.563218	0.581022	0.581267	0.588398	0.586255	0.584527	0.592806	0.567416	0.579627	0.571819	0.571038	0.562841	0.586301	0.574176	0.543978	0.580733	0.585499	0.593197	0.57384	0.569425	0.576319	0.580551	0.556348	0.585434	0.571839	0.565341	0.586742	0.587413	0.589081	0.59021	0.554765	0.553977	0.575843	0.558739	0.550725	0.569364	0.554217	0.525547	0.542569	0.574344	0.580175	0.552553	0.569343	0.577844
0.5394737	0.567026	0.58841	0.583454	0.580741	0.576577	0.572246	0.59593	0.584362	0.594223	0.589386	0.576319	0.610315	0.579021	0.6	0.585831	0.593197	0.587755	0.58663	0.580027	0.568733	0.589189	0.594005	0.598916	0.577031	0.581006	0.590909	0.586705	0.582386	0.6053	0.583691	0.579915	0.589888	0.584958	0.592275	0.598886	0.560906	0.565771	0.593007	0.576319	0.556999	0.572662	0.548726	0.543605	0.557471	0.58926	0.580551	0.562033	0.569767	0.5693
0.5592105	0.567026	0.58841	0.597968	0.604444	0.585586	0.583691	0.604651	0.603567	0.618982	0.614525	0.584879	0.610315	0.595804	0.602857	0.599455	0.60136	0.595918	0.603001	0.596443	0.568733	0.602703	0.610354	0.615176	0.588235	0.592179	0.596591	0.618497	0.585227	0.608089	0.595136	0.582744	0.609551	0.615599	0.606581	0.623955	0.563739	0.585573	0.612587	0.587732	0.571429	0.578417	0.566717	0.569767	0.554598	0.577649	0.580551	0.559043	0.587209	0.584203
0.5695364	0.592248	0.600897	0.60438	0.587183	0.595166	0.581295	0.622807	0.601379	0.603043	0.61236	0.602583	0.622478	0.601969	0.62931	0.594521	0.601915	0.599179	0.617284	0.596974	0.569106	0.592391	0.605479	0.60218	0.588732	0.595506	0.602857	0.598837	0.58	0.60028	0.589928	0.59744	0.601695	0.602241	0.607194	0.593838	0.584046	0.583215	0.613221	0.582496	0.586357	0.578871	0.585219	0.584795	0.563584	0.578102	0.586861	0.565414	0.581871	0.596702
0.5617597	0.575949	0.582317	0.580357	0.577508	0.576271	0.568915	0.605067	0.589888	0.597183	0.609442	0.576023	0.60793	0.581662	0.600293	0.577406	0.582173	0.573816	0.594972	0.579832	0.548965	0.57538	0.588564	0.599168	0.579627	0.589413	0.57933	0.58963	0.57933	0.591429	0.577713	0.57971	0.58705	0.590585	0.59824	0.610556	0.574746	0.576812	0.604584	0.573099	0.550296	0.575221	0.569231	0.566319	0.544919	0.574405	0.568452	0.558282	0.554396	0.568807
0.5487603	0.55418	0.58209	0.57726	0.589286	0.576169	0.571839	0.60438	0.589532	0.599448	0.586255	0.567335	0.595684	0.575843	0.596844	0.580027	0.590164	0.581967	0.583562	0.585165	0.554804	0.580733	0.588235	0.595918	0.568214	0.56662	0.576319	0.595065	0.556348	0.585434	0.566092	0.5625	0.5811	0.595804	0.586207	0.587413	0.554765	0.556818	0.603933	0.56447	0.556522	0.575144	0.554217	0.554744	0.536797	0.571429	0.562682	0.558559	0.557664	0.568862
0.5531915	0.555215	0.573964	0.580925	0.587021	0.58296	0.586895	0.602026	0.587432	0.605479	0.609179	0.582386	0.601997	0.590529	0.600284	0.578019	0.593496	0.596206	0.597826	0.588556	0.55302	0.576043	0.605156	0.601889	0.582985	0.581363	0.5686	0.592806	0.574257	0.586111	0.578348	0.577465	0.581818	0.599168	0.598291	0.59362	0.555712	0.566197	0.610028	0.571023	0.548851	0.570201	0.570149	0.558611	0.55794	0.575144	0.572254	0.559524	0.575977	0.575668
0.5418060	0.550861	0.567119	0.583211	0.565414	0.576219	0.566038	0.58997	0.578581	0.591353	0.583569	0.573083	0.587209	0.58156	0.588406	0.585635	0.576552	0.584828	0.59751	0.585298	0.551913	0.569863	0.588398	0.582418	0.571023	0.575071	0.587896	0.580645	0.576369	0.594059	0.58926	0.573888	0.581197	0.587571	0.583454	0.584746	0.560345	0.553802	0.601418	0.573083	0.565154	0.569343	0.569254	0.545723	0.548105	0.55081	0.547864	0.540212	0.560472	0.553706
0.5472637	0.562112	0.586826	0.596491	0.576119	0.590015	0.576369	0.600293	0.593923	0.614958	0.610408	0.600575	0.623377	0.597183	0.604317	0.600823	0.60274	0.59726	0.612637	0.595041	0.56445	0.590476	0.611797	0.60573	0.583921	0.587904	0.58083	0.590975	0.569385	0.598315	0.59366	0.606838	0.582744	0.617111	0.613833	0.614306	0.576319	0.578348	0.628169	0.58046	0.581395	0.573913	0.567976	0.57101	0.561505	0.578947	0.578947	0.569277	0.576867	0.591592
0.5546218	0.575472	0.587879	0.600592	0.589124	0.58193	0.597668	0.61037	0.592179	0.602241	0.614509	0.581395	0.613139	0.584046	0.599709	0.59362	0.584488	0.590028	0.602778	0.593315	0.567901	0.599725	0.618585	0.609655	0.590585	0.58606	0.599132	0.592047	0.58466	0.599432	0.591837	0.573487	0.595136	0.629787	0.600583	0.62695	0.574315	0.576369	0.618234	0.601744	0.585294	0.580645	0.58104	0.554074	0.559297	0.573964	0.573964	0.564024	0.577778	0.568389
0.5411765	0.559748	0.590909	0.588757	0.589124	0.594181	0.58309	0.604444	0.589386	0.59944	0.611664	0.601744	0.60438	0.586895	0.593886	0.576976	0.587258	0.576177	0.6	0.584958	0.55144	0.591472	0.613037	0.604138	0.582026	0.588905	0.610709	0.586156	0.575977	0.59375	0.606414	0.56196	0.592275	0.615603	0.600583	0.612766	0.565657	0.567723	0.598291	0.572674	0.567647	0.56305	0.562691	0.548148	0.559297	0.568047	0.576923	0.560976	0.568889	0.580547
0.5650685	0.5536	0.57319	0.586466	0.580645	0.573209	0.571852	0.584337	0.584397	0.594595	0.592485	0.593796	0.617211	0.58466	0.588757	0.566197	0.596343	0.576653	0.595205	0.591231	0.554318	0.586592	0.594366	0.585434	0.571014	0.583815	0.588235	0.580838	0.579412	0.574315	0.598518	0.562226	0.593023	0.605187	0.595556	0.610951	0.568915	0.562226	0.602026	0.573117	0.573991	0.584203	0.566096	0.551205	0.559524	0.565414	0.583459	0.56124	0.575301	0.568779
0.5315615	0.541213	0.572714	0.576867	0.565022	0.569697	0.582973	0.589443	0.583679	0.601942	0.597183	0.589928	0.609827	0.564175	0.59366	0.56044	0.581619	0.578875	0.588721	0.57931	0.55163	0.583106	0.598901	0.587432	0.570622	0.56338	0.573066	0.565598	0.558739	0.576653	0.580087	0.562054	0.589235	0.601124	0.600289	0.609551	0.56	0.553495	0.598025	0.566906	0.558952	0.574746	0.556732	0.545454	0.553623	0.559297	0.568082	0.53997	0.560117	0.544361
0.5598651	0.570978	0.592705	0.575668	0.578788	0.580645	0.584795	0.594354	0.582633	0.589888	0.596291	0.58309	0.600293	0.58	0.586861	0.570236	0.583333	0.569444	0.593315	0.583799	0.552957	0.576552	0.609179	0.589212	0.577968	0.570613	0.586357	0.581979	0.560232	0.592593	0.573099	0.560694	0.588235	0.594595	0.596491	0.611664	0.552822	0.563584	0.594286	0.574344	0.569322	0.558824	0.546012	0.546805	0.549192	0.5727	0.575668	0.562691	0.576523	0.579268
0.5606838	0.546326	0.587692	0.576577	0.570552	0.566096	0.568047	0.583459	0.575071	0.602273	0.597403	0.59587	0.592593	0.572254	0.576071	0.57384	0.575843	0.567416	0.585916	0.584746	0.539638	0.574616	0.590717	0.581818	0.578871	0.571429	0.584435	0.57997	0.558003	0.582133	0.576923	0.564327	0.58926	0.604317	0.606509	0.610072	0.556369	0.555556	0.583815	0.569322	0.555224	0.5625	0.552795	0.544361	0.555721	0.561562	0.582583	0.547988	0.577444	0.564815
0.5498282	0.542536	0.57187	0.561086	0.567026	0.565625	0.558692	0.567976	0.554765	0.579173	0.585507	0.577778	0.589286	0.55733	0.569733	0.562147	0.575458	0.566996	0.585573	0.561702	0.536313	0.577031	0.576271	0.567416	0.561047	0.55942	0.575221	0.555556	0.530973	0.552822	0.576523	0.540382	0.571429	0.586705	0.576523	0.580925	0.538235	0.543319	0.580551	0.565926	0.542729	0.544096	0.542902	0.531722	0.540299	0.53997	0.555053	0.544323	0.55287	0.551938
0.5415929	0.541254	0.574603	0.591331	0.56962	0.568218	0.557927	0.586047	0.571429	0.590643	0.591382	0.592705	0.59542	0.559524	0.584475	0.558611	0.563584	0.557804	0.573913	0.563953	0.540772	0.571019	0.581766	0.57554	0.57228	0.567608	0.583964	0.567026	0.553706	0.5727	0.579268	0.554217	0.58296	0.583704	0.582317	0.604444	0.533937	0.536145	0.583333	0.565349	0.544615	0.56135	0.535256	0.539535	0.545176	0.544892	0.560372	0.549521	0.56124	0.55414
0.5451389	0.547812	0.570983	0.575342	0.562986	0.55205	0.551724	0.570122	0.56241	0.569784	0.567252	0.571002	0.576577	0.553441	0.565868	0.549857	0.571835	0.54623	0.582026	0.555079	0.538028	0.567797	0.578348	0.563739	0.568915	0.561404	0.568452	0.557576	0.547619	0.557664	0.566717	0.554074	0.567647	0.57726	0.575712	0.586006	0.52819	0.542222	0.57101	0.571002	0.532527	0.552036	0.541732	0.533537	0.554217	0.554033	0.563166	0.55573	0.573171	0.56651
0.5559441	0.538336	0.574568	0.588055	0.56025	0.574603	0.570136	0.588957	0.568543	0.599132	0.591176	0.589474	0.589124	0.568483	0.578313	0.561605	0.58083	0.566524	0.591105	0.578417	0.552408	0.571023	0.584527	0.589744	0.578171	0.585294	0.580838	0.579268	0.571856	0.566813	0.579186	0.575261	0.58284	0.592375	0.588235	0.58651	0.546269	0.548435	0.583211	0.574436	0.547945	0.567527	0.545166	0.555215	0.551515	0.548239	0.563553	0.549763	0.57362	0.55748
0.5412186	0.54424	0.58427	0.588419	0.5664	0.571429	0.548536	0.583072	0.568483	0.576071	0.585586	0.580645	0.611111	0.586466	0.578461	0.570175	0.578102	0.572263	0.582723	0.56975	0.546243	0.571014	0.576023	0.578488	0.572289	0.573574	0.565749	0.570094	0.547401	0.566717	0.57319	0.554033	0.567976	0.57485	0.582434	0.57485	0.545732	0.538813	0.589474	0.565284	0.544323	0.548837	0.541329	0.54232	0.532508	0.56338	0.56964	0.558966	0.573668	0.557166
0.5418895	0.541528	0.565495	0.570094	0.576433	0.549273	0.564417	0.567863	0.571847	0.582353	0.57997	0.584098	0.589862	0.55988	0.572741	0.558952	0.575581	0.563953	0.588921	0.573099	0.541007	0.577201	0.588064	0.575977	0.575712	0.57997	0.581431	0.579845	0.554033	0.555224	0.57362	0.560606	0.574436	0.581222	0.579755	0.578241	0.543247	0.554546	0.58982	0.577982	0.55418	0.561728	0.558064	0.549142	0.533128	0.563863	0.570094	0.549839	0.570983	0.554487
0.5470693	0.539735	0.566879	0.571429	0.55873	0.560387	0.550459	0.559876	0.555556	0.568915	0.5693	0.588415	0.58193	0.558209	0.570992	0.551524	0.556522	0.547826	0.578488	0.556851	0.536585	0.564029	0.574746	0.577201	0.556054	0.575261	0.570562	0.559505	0.540212	0.53869	0.562691	0.555891	0.575712	0.57058	0.584098	0.576523	0.544629	0.55287	0.573134	0.554878	0.546296	0.550769	0.543408	0.534992	0.546851	0.543478	0.568323	0.541667	0.550544	0.539936
0.5190563	0.523649	0.535714	0.537975	0.537217	0.489327	0.517134	0.526149	0.541667	0.549254	0.515933	0.531056	0.524181	0.525836	0.522551	0.519941	0.554572	0.533923	0.535503	0.548961	0.534307	0.524158	0.534712	0.528634	0.52968	0.534143	0.540958	0.551181	0.540958	0.527273	0.545171	0.516923	0.558779	0.538578	0.554517	0.565809	0.53621	0.550769	0.56231	0.562112	0.54717	0.548589	0.537705	0.541997	0.57903	0.53481	0.550633	0.526144	0.535658	0.511401
0.5363322	0.53958	0.559876	0.555387	0.567442	0.525157	0.529148	0.547113	0.560801	0.568149	0.559767	0.566319	0.541916	0.572263	0.564179	0.551136	0.590071	0.547518	0.566145	0.582026	0.558989	0.546479	0.551136	0.567797	0.55848	0.553936	0.563798	0.574018	0.551929	0.558952	0.565022	0.543575	0.577713	0.555233	0.571002	0.572674	0.538462	0.564254	0.581022	0.581222	0.567119	0.556391	0.55259	0.565349	0.582583	0.546282	0.555387	0.544601	0.559271	0.542902
0.5352113	0.541872	0.559242	0.5547	0.56063	0.517572	0.528073	0.555556	0.560232	0.576419	0.553254	0.559758	0.547113	0.554074	0.560606	0.544669	0.584173	0.546763	0.556999	0.570188	0.558405	0.54	0.550432	0.555874	0.560831	0.550296	0.569277	0.57362	0.560241	0.564254	0.582701	0.56072	0.580357	0.569322	0.579666	0.587021	0.54955	0.557721	0.571852	0.580938	0.563553	0.549618	0.561404	0.558642	0.588415	0.557781	0.563944	0.559618	0.567901	0.557845
0.5457686	0.56129	0.565217	0.569697	0.557276	0.530612	0.555224	0.564492	0.574286	0.590258	0.570597	0.577381	0.571002	0.565598	0.575261	0.564539	0.589235	0.558074	0.582386	0.586895	0.57784	0.551336	0.575886	0.569817	0.583942	0.564774	0.580741	0.576169	0.571852	0.575581	0.58209	0.566372	0.597365	0.571843	0.6	0.580551	0.567208	0.587021	0.591837	0.592262	0.581325	0.582583	0.564263	0.579666	0.587706	0.581818	0.587879	0.56875	0.576631	0.557632
0.5384615	0.554649	0.562009	0.572741	0.57277	0.536508	0.555053	0.564417	0.562771	0.570188	0.570588	0.583459	0.574018	0.565538	0.578313	0.553009	0.600858	0.572246	0.579627	0.58705	0.549575	0.553977	0.567335	0.581197	0.587021	0.552941	0.577844	0.588415	0.562874	0.558003	0.579186	0.548435	0.576923	0.565982	0.573152	0.589443	0.573134	0.578241	0.597938	0.586466	0.590563	0.564492	0.567353	0.576687	0.578788	0.566616	0.566616	0.552923	0.58589	0.544882
0.5476603	0.556634	0.576324	0.568389	0.562112	0.535433	0.550898	0.563166	0.56447	0.571839	0.569343	0.576119	0.575712	0.564327	0.573991	0.5633	0.588068	0.576704	0.578348	0.58	0.565401	0.544429	0.566145	0.565771	0.57101	0.554744	0.582467	0.577912	0.543834	0.565598	0.57485	0.544379	0.56975	0.547307	0.57485	0.573508	0.565926	0.568047	0.581871	0.585075	0.577039	0.572289	0.562893	0.572298	0.562406	0.550152	0.56231	0.54232	0.56621	0.54375
0.5177665	0.537975	0.576219	0.568452	0.559271	0.545454	0.548387	0.578241	0.575843	0.569014	0.560801	0.578947	0.563877	0.561605	0.579795	0.552301	0.593315	0.571031	0.594972	0.585434	0.565517	0.556017	0.577406	0.57975	0.576758	0.572246	0.582242	0.586667	0.561863	0.56	0.58651	0.562319	0.584173	0.56776	0.595308	0.587732	0.56894	0.571014	0.584527	0.587719	0.579882	0.572271	0.572308	0.57228	0.586156	0.559524	0.580357	0.570552	0.5693	0.556575
0.5494137	0.548589	0.589124	0.581121	0.575301	0.549618	0.552326	0.579025	0.579387	0.581006	0.575886	0.585507	0.573508	0.573864	0.586357	0.564315	0.593923	0.58011	0.595568	0.588889	0.580027	0.562414	0.572614	0.572215	0.57468	0.561702	0.568543	0.575624	0.551227	0.560906	0.56686	0.543103	0.576319	0.551627	0.569767	0.579915	0.552518	0.586207	0.590909	0.591304	0.577713	0.564327	0.564024	0.573117	0.583942	0.554572	0.566372	0.565349	0.573117	0.551515
0.5397351	0.555039	0.568012	0.586861	0.575261	0.540786	0.561151	0.581871	0.595862	0.580913	0.58427	0.591105	0.567723	0.57384	0.568966	0.561644	0.585499	0.571819	0.587106	0.58597	0.571816	0.554348	0.586301	0.577657	0.577465	0.558989	0.571429	0.584302	0.565714	0.5554	0.581295	0.560455	0.59887	0.565826	0.592806	0.582633	0.564103	0.577525	0.590717	0.599713	0.586357	0.558611	0.561086	0.573099	0.580925	0.569343	0.575183	0.574436	0.573099	0.542729
0.5460526	0.567026	0.591382	0.586357	0.586667	0.555556	0.572246	0.587209	0.587106	0.58597	0.586592	0.599144	0.573066	0.573427	0.591429	0.572207	0.595918	0.579592	0.594816	0.588235	0.579515	0.551351	0.583106	0.585366	0.57423	0.569832	0.588068	0.598266	0.553977	0.563459	0.575107	0.571429	0.589888	0.568245	0.589413	0.593315	0.577904	0.579915	0.59021	0.60485	0.600289	0.58705	0.578711	0.584302	0.586207	0.571843	0.577649	0.58296	0.569767	0.551416
0.5497470	0.567823	0.595745	0.590504	0.59697	0.556068	0.578947	0.594354	0.59944	0.587079	0.587732	0.606414	0.585651	0.582857	0.59562	0.567455	0.602778	0.588889	0.604457	0.594972	0.574966	0.565517	0.59249	0.594744	0.586552	0.579173	0.58926	0.602659	0.574746	0.566952	0.584795	0.572254	0.588235	0.57468	0.590643	0.603129	0.578871	0.583815	0.597143	0.612245	0.60177	0.582353	0.579755	0.58841	0.587372	0.578635	0.581602	0.584098	0.585438	0.560976
0.5146580	0.561832	0.600884	0.589928	0.596182	0.556548	0.57305	0.602306	0.598639	0.600273	0.584488	0.599717	0.585227	0.59362	0.609065	0.581081	0.612686	0.604588	0.614344	0.602442	0.604278	0.58445	0.602703	0.604839	0.605556	0.592798	0.594366	0.60745	0.577465	0.59751	0.604255	0.569425	0.612813	0.577348	0.601418	0.61326	0.589888	0.591865	0.599168	0.622348	0.609442	0.590585	0.582467	0.59366	0.60114	0.589928	0.592806	0.595556	0.605187	0.570163
0.5481240	0.571865	0.59292	0.59366	0.582353	0.57228	0.573864	0.585859	0.574932	0.592896	0.588072	0.609065	0.594595	0.591667	0.61844	0.568336	0.616216	0.591892	0.604336	0.600544	0.594378	0.58255	0.58728	0.592194	0.59249	0.576976	0.583921	0.593974	0.569817	0.590028	0.596591	0.567416	0.591353	0.567082	0.590909	0.608575	0.587904	0.595506	0.6	0.600567	0.590258	0.585714	0.577381	0.597403	0.60485	0.582133	0.585014	0.587537	0.603175	0.568047
0.5409015	0.575	0.593373	0.597059	0.582583	0.544901	0.573913	0.571429	0.591667	0.593315	0.577086	0.592485	0.592163	0.580736	0.599132	0.56	0.600551	0.589532	0.582873	0.587258	0.564802	0.566348	0.593103	0.573388	0.592908	0.571429	0.595684	0.58858	0.564029	0.581921	0.588406	0.553009	0.58037	0.575458	0.582609	0.603667	0.571019	0.573066	0.600567	0.586705	0.587719	0.588921	0.577508	0.583211	0.590975	0.573529	0.591176	0.587879	0.597938	0.567976
0.5451505	0.57277	0.603318	0.600884	0.598496	0.560976	0.574746	0.59292	0.595271	0.6053	0.594901	0.593343	0.598837	0.575886	0.608696	0.577348	0.609655	0.587586	0.600277	0.588072	0.579235	0.572603	0.588398	0.585165	0.579546	0.569405	0.579251	0.592375	0.553314	0.579915	0.583454	0.56241	0.589744	0.559322	0.58926	0.60452	0.568966	0.591105	0.604255	0.593343	0.58858	0.589781	0.581431	0.59882	0.588921	0.574374	0.592047	0.600911	0.60472	0.559758
0.5552050	0.580741	0.609442	0.60979	0.607703	0.580925	0.57931	0.593838	0.609271	0.608234	0.590297	0.616231	0.610497	0.609986	0.625344	0.586842	0.61498	0.61498	0.606061	0.599736	0.596354	0.600522	0.6	0.594241	0.610811	0.576819	0.60274	0.610028	0.569863	0.592194	0.598621	0.578445	0.593496	0.583333	0.593103	0.610215	0.581967	0.58663	0.596491	0.594223	0.600835	0.599168	0.580087	0.59944	0.612188	0.579021	0.587413	0.58705	0.607843	0.579627
0.5433715	0.595092	0.600592	0.601156	0.59292	0.568012	0.592593	0.596237	0.595628	0.594521	0.586926	0.613636	0.599144	0.601671	0.614509	0.594301	0.609756	0.596206	0.600544	0.604905	0.593289	0.589502	0.605156	0.593792	0.599721	0.578581	0.594059	0.61295	0.565771	0.597222	0.589744	0.566197	0.601399	0.582524	0.60114	0.604716	0.595205	0.591549	0.601671	0.596591	0.600575	0.584527	0.576119	0.58466	0.600858	0.580925	0.592485	0.592262	0.596237	0.578635
0.5405405	0.576119	0.613833	0.602817	0.600575	0.582242	0.588889	0.617772	0.610667	0.606952	0.613297	0.620499	0.603616	0.600544	0.621359	0.601325	0.624339	0.611111	0.628647	0.617021	0.608126	0.596583	0.609271	0.613966	0.606803	0.60787	0.612414	0.622721	0.57931	0.598916	0.608333	0.593407	0.627558	0.589986	0.613889	0.614344	0.618982	0.618132	0.622283	0.620499	0.635854	0.606145	0.59593	0.609309	0.610879	0.594366	0.602817	0.6	0.617772	0.578035
0.5416667	0.580451	0.62119	0.61844	0.616498	0.589443	0.593007	0.616477	0.612081	0.621803	0.622951	0.622036	0.613445	0.604651	0.634078	0.605333	0.639148	0.617843	0.632844	0.629183	0.620053	0.60582	0.626667	0.62069	0.613699	0.601093	0.6	0.627119	0.583333	0.619372	0.620979	0.583679	0.634615	0.59673	0.60979	0.629428	0.603878	0.614108	0.626539	0.619247	0.620592	0.601969	0.597365	0.622159	0.615169	0.601418	0.609929	0.60438	0.613636	0.582242
0.5356577	0.58631	0.606322	0.603933	0.601719	0.583454	0.587258	0.618847	0.614362	0.629333	0.614344	0.624309	0.615811	0.607046	0.622407	0.60502	0.614776	0.604222	0.626984	0.607427	0.606536	0.608126	0.620872	0.620236	0.613297	0.603518	0.602476	0.620979	0.574966	0.597297	0.601108	0.586301	0.620408	0.588394	0.603878	0.615385	0.59808	0.608219	0.612466	0.599448	0.597765	0.579387	0.585507	0.601969	0.603616	0.58427	0.598315	0.589595	0.59353	0.564841
0.5434439	0.581602	0.616046	0.616247	0.605714	0.575977	0.59116	0.619916	0.612732	0.617021	0.618084	0.61708	0.608575	0.610811	0.62069	0.603426	0.623684	0.607895	0.620053	0.616402	0.604954	0.60915	0.619236	0.626474	0.614344	0.593792	0.59808	0.610879	0.578875	0.603774	0.59116	0.576503	0.610583	0.611036	0.610497	0.627187	0.593707	0.606557	0.616216	0.608815	0.607242	0.586111	0.578035	0.60028	0.60749	0.591036	0.602241	0.590778	0.605891	0.577586
0.5398374	0.582317	0.602941	0.603448	0.604106	0.591382	0.600567	0.618705	0.616848	0.604905	0.61964	0.607345	0.609929	0.606648	0.630834	0.582996	0.630728	0.614555	0.62973	0.620596	0.603471	0.605087	0.631579	0.609396	0.618585	0.59751	0.587904	0.620887	0.59353	0.60221	0.620397	0.577031	0.611961	0.606897	0.620397	0.617931	0.60028	0.605042	0.623269	0.61017	0.617143	0.606838	0.596439	0.61295	0.605974	0.589081	0.606322	0.597633	0.595684	0.581121
0.5136437	0.536145	0.587209	0.585227	0.571014	0.558003	0.571429	0.58037	0.591398	0.601078	0.582763	0.583799	0.58906	0.569863	0.59021	0.558077	0.605333	0.594667	0.601604	0.595174	0.573316	0.577483	0.598131	0.59761	0.587106	0.571819	0.581363	0.599717	0.556328	0.57377	0.593838	0.562327	0.594223	0.581173	0.579832	0.611187	0.585298	0.573407	0.605479	0.589386	0.584746	0.574648	0.568915	0.583215	0.585091	0.5625	0.573864	0.573099	0.58606	0.559767
0.5327103	0.57101	0.619519	0.625173	0.603667	0.582857	0.608458	0.612188	0.621232	0.628121	0.618667	0.620408	0.60929	0.606141	0.634877	0.609375	0.637191	0.618986	0.636245	0.630065	0.623711	0.625323	0.645833	0.629534	0.625668	0.608	0.607046	0.619835	0.582656	0.61518	0.619372	0.593792	0.621984	0.625	0.62483	0.640957	0.608108	0.615385	0.632844	0.620408	0.616231	0.609054	0.593438	0.612188	0.619178	0.600277	0.622407	0.611664	0.609418	0.590071
0.5242718	0.552352	0.594436	0.586552	0.578102	0.56213	0.600846	0.601719	0.58728	0.58616	0.606061	0.601969	0.59322	0.587586	0.594366	0.572581	0.604027	0.601342	0.611036	0.612686	0.585106	0.578667	0.604839	0.593583	0.59116	0.586777	0.588235	0.60114	0.568627	0.583219	0.603667	0.569038	0.609418	0.582418	0.606488	0.623626	0.583799	0.596932	0.606897	0.616034	0.603129	0.598582	0.581979	0.598854	0.592068	0.577968	0.597997	0.592047	0.601719	0.590308
0.5201939	0.542424	0.567252	0.582857	0.57726	0.543575	0.56338	0.577968	0.575676	0.582656	0.574966	0.575843	0.583921	0.589532	0.582279	0.571812	0.595174	0.595174	0.594086	0.601078	0.573705	0.577896	0.593289	0.59279	0.598621	0.558459	0.576224	0.600284	0.562238	0.582418	0.577465	0.56546	0.603043	0.587106	0.585916	0.59808	0.574616	0.582173	0.595041	0.587079	0.590909	0.572238	0.569322	0.575107	0.588402	0.571429	0.585714	0.588235	0.595136	0.565982
0.5280000	0.567568	0.597101	0.592068	0.598266	0.568082	0.583799	0.595745	0.595174	0.604839	0.608458	0.607242	0.60979	0.598361	0.6053	0.580559	0.62234	0.601064	0.608	0.598931	0.59025	0.581242	0.60719	0.606622	0.615595	0.592087	0.588072	0.600846	0.57975	0.580381	0.594972	0.574586	0.59808	0.595918	0.592179	0.617687	0.59751	0.60221	0.612022	0.604457	0.602817	0.58427	0.576023	0.592908	0.591865	0.575071	0.597734	0.594752	0.621277	0.587209
0.5283019	0.564254	0.590585	0.596932	0.583215	0.556196	0.569464	0.592179	0.59181	0.603974	0.602151	0.609054	0.61708	0.592194	0.612637	0.585302	0.613368	0.610747	0.612352	0.606061	0.597403	0.585938	0.593176	0.600522	0.603774	0.602151	0.587432	0.605556	0.576503	0.58792	0.602476	0.571429	0.613514	0.581769	0.605227	0.621984	0.599455	0.60136	0.613728	0.60631	0.59362	0.603043	0.595684	0.597765	0.607735	0.582985	0.596932	0.599713	0.606145	0.572246
0.5378671	0.552326	0.598315	0.604396	0.585434	0.564539	0.577236	0.605227	0.606771	0.610966	0.606622	0.608108	0.597015	0.591512	0.598105	0.582148	0.612403	0.607235	0.626943	0.623377	0.604353	0.60077	0.610608	0.615187	0.61089	0.593378	0.589502	0.596443	0.581427	0.595238	0.596206	0.579089	0.625832	0.594452	0.609756	0.61823	0.593289	0.603217	0.628647	0.616216	0.592896	0.585831	0.580736	0.583219	0.595918	0.582418	0.604396	0.607345	0.605227	0.580282
0.5559105	0.581709	0.60492	0.588402	0.571429	0.555556	0.566248	0.577904	0.583668	0.609396	0.60218	0.603616	0.600559	0.592087	0.604457	0.585106	0.600266	0.61089	0.604527	0.59279	0.592105	0.591029	0.611702	0.60582	0.603825	0.591281	0.592798	0.585916	0.554017	0.568708	0.599721	0.562759	0.60274	0.592391	0.599721	0.603261	0.59116	0.601379	0.613915	0.598053	0.585091	0.580645	0.569343	0.583569	0.577031	0.574257	0.591231	0.582242	0.600567	0.563135
0.5448819	0.571006	0.614286	0.617318	0.603989	0.582973	0.597796	0.606993	0.611111	0.618037	0.608344	0.612637	0.601379	0.595687	0.627235	0.583443	0.622047	0.611549	0.613158	0.612137	0.605982	0.597132	0.620236	0.611765	0.607287	0.611036	0.612859	0.617524	0.585499	0.604839	0.608815	0.594005	0.622463	0.604027	0.62259	0.609396	0.60573	0.618529	0.628032	0.615385	0.616667	0.612188	0.610951	0.601399	0.605809	0.597765	0.617318	0.606322	0.612587	0.575931
0.5371248	0.554896	0.595989	0.596639	0.585714	0.549928	0.577348	0.60028	0.586207	0.595745	0.591093	0.597796	0.589212	0.575676	0.595862	0.55863	0.586842	0.597368	0.598945	0.600529	0.581486	0.585621	0.603426	0.600262	0.589986	0.574899	0.573388	0.582985	0.554184	0.563342	0.577348	0.54918	0.594301	0.589502	0.577348	0.594886	0.580027	0.5847	0.591892	0.570248	0.571031	0.572222	0.563584	0.563815	0.576976	0.557423	0.568627	0.582133	0.591865	0.560345
0.5567652	0.593567	0.621469	0.621547	0.605634	0.573466	0.591281	0.614108	0.620419	0.622047	0.623169	0.625	0.619372	0.592	0.617687	0.595579	0.612987	0.620779	0.625	0.624021	0.615187	0.596129	0.629389	0.628719	0.611482	0.60719	0.603518	0.616231	0.581867	0.590426	0.604905	0.590297	0.629183	0.613546	0.626703	0.640106	0.609986	0.614555	0.624	0.605978	0.60989	0.60274	0.598291	0.600277	0.607387	0.596685	0.610497	0.605114	0.61964	0.589235
0.5304212	0.560117	0.600567	0.598338	0.601695	0.572246	0.581967	0.60749	0.598425	0.623684	0.600801	0.604905	0.599179	0.590909	0.608458	0.586701	0.617188	0.601562	0.610966	0.615183	0.585807	0.589909	0.61017	0.61738	0.615796	0.608812	0.602442	0.628965	0.580733	0.602667	0.612022	0.594595	0.630872	0.591212	0.614754	0.609854	0.608931	0.610811	0.620321	0.60218	0.603306	0.598901	0.58	0.588072	0.595336	0.592798	0.601108	0.592593	0.599168	0.599432
0.5492063	0.551416	0.58705	0.590717	0.591105	0.563953	0.576976	0.580282	0.593875	0.603471	0.598916	0.600277	0.597222	0.58616	0.598338	0.595238	0.61823	0.597094	0.61192	0.613546	0.589005	0.585302	0.611111	0.6	0.608696	0.590786	0.581267	0.607843	0.567493	0.600812	0.599168	0.576132	0.629428	0.583784	0.615811	0.616216	0.590659	0.603567	0.618725	0.616874	0.601399	0.594142	0.586357	0.6	0.601671	0.596343	0.607595	0.587554	0.594366	0.580087
0.5718799	0.58457	0.610315	0.613445	0.597143	0.575977	0.599448	0.614306	0.607427	0.611702	0.593792	0.606061	0.611342	0.594595	0.617931	0.592885	0.618421	0.613158	0.617414	0.621693	0.612777	0.601307	0.624506	0.608126	0.622463	0.607287	0.611797	0.622036	0.587106	0.601078	0.616022	0.590164	0.635007	0.594886	0.610497	0.611036	0.607387	0.612022	0.621622	0.619835	0.62117	0.588889	0.589595	0.586255	0.599168	0.591036	0.610644	0.602306	0.605891	0.583333
0.5232198	0.556041	0.601969	0.602476	0.569425	0.571023	0.569878	0.578512	0.594524	0.603922	0.612732	0.600812	0.600544	0.592298	0.623306	0.585492	0.628719	0.592497	0.612192	0.603381	0.594872	0.588689	0.598446	0.592784	0.593085	0.591512	0.592992	0.59726	0.560647	0.596027	0.594301	0.590604	0.602667	0.589947	0.599729	0.603175	0.599462	0.598658	0.618858	0.589986	0.585499	0.594816	0.57305	0.578512	0.594005	0.577717	0.583219	0.577086	0.586777	0.566996
0.5294118	0.558952	0.610408	0.610729	0.586255	0.559659	0.583446	0.608815	0.602347	0.616993	0.604774	0.606225	0.608696	0.594954	0.615176	0.588083	0.626132	0.613195	0.619974	0.624187	0.605128	0.611825	0.603627	0.608247	0.606383	0.596817	0.601078	0.608219	0.576819	0.603974	0.602442	0.585235	0.621333	0.603175	0.618725	0.624339	0.607527	0.620134	0.626826	0.603518	0.607387	0.60573	0.592908	0.589532	0.604905	0.594223	0.594223	0.602546	0.603306	0.5811
0.5373609	0.558209	0.596542	0.591549	0.591954	0.556041	0.563889	0.578279	0.589333	0.596257	0.572592	0.581717	0.581363	0.576087	0.599168	0.564238	0.584656	0.587302	0.578249	0.587766	0.576671	0.562418	0.58543	0.577075	0.585034	0.580733	0.573793	0.605891	0.573793	0.579946	0.572222	0.574176	0.60573	0.576455	0.580556	0.598105	0.583219	0.582418	0.595109	0.578947	0.593838	0.583799	0.575581	0.572638	0.582985	0.574648	0.569014	0.565217	0.592384	0.557804
0.5492063	0.57228	0.61295	0.607595	0.585366	0.587209	0.582524	0.605634	0.588549	0.616822	0.596206	0.59751	0.6	0.578019	0.601108	0.568783	0.60502	0.599736	0.598676	0.602922	0.591623	0.585302	0.600529	0.589474	0.592391	0.579946	0.603306	0.593838	0.589532	0.58728	0.599168	0.576132	0.618529	0.583784	0.59362	0.613514	0.585165	0.589849	0.605156	0.594744	0.59021	0.588564	0.56894	0.569014	0.590529	0.576653	0.585091	0.581766	0.605634	0.559885
0.5422648	0.553892	0.592485	0.584746	0.585014	0.578102	0.573816	0.585573	0.585561	0.603217	0.598639	0.611111	0.60251	0.585831	0.595271	0.576361	0.618037	0.591512	0.606383	0.6	0.604468	0.58498	0.61089	0.607662	0.613915	0.593197	0.580913	0.601969	0.55325	0.578804	0.590529	0.575758	0.607387	0.594301	0.598886	0.613297	0.576552	0.584022	0.599455	0.602778	0.570225	0.571429	0.565598	0.5686	0.593007	0.584746	0.596045	0.598837	0.602546	0.57971
0.5466238	0.573152	0.585153	0.588905	0.592163	0.591176	0.575035	0.609687	0.592194	0.59919	0.60274	0.595804	0.601124	0.587106	0.593838	0.569519	0.614152	0.598131	0.610442	0.604027	0.589947	0.580902	0.601604	0.598404	0.601648	0.591781	0.584958	0.620397	0.576602	0.585499	0.605891	0.582524	0.619835	0.5847	0.605891	0.595628	0.586111	0.596394	0.59808	0.601399	0.596888	0.583921	0.575624	0.578348	0.580282	0.577525	0.59744	0.579795	0.592593	0.572263
0.5368917	0.557522	0.586895	0.582173	0.573864	0.569784	0.576923	0.580195	0.580475	0.597884	0.590604	0.594521	0.588721	0.583333	0.584362	0.576671	0.609948	0.586387	0.60105	0.592105	0.583658	0.577373	0.589777	0.589309	0.613728	0.577181	0.575716	0.57975	0.564802	0.58445	0.587912	0.567935	0.615385	0.570281	0.576923	0.594378	0.579592	0.592391	0.607527	0.6	0.581717	0.58011	0.563218	0.566248	0.587586	0.559889	0.584958	0.575931	0.591353	0.565714
0.5445705	0.565349	0.601173	0.584527	0.584795	0.56	0.570622	0.568149	0.588076	0.600544	0.595862	0.597183	0.577086	0.582873	0.592384	0.570659	0.58871	0.58871	0.595687	0.594595	0.580559	0.576769	0.584118	0.580991	0.594744	0.571035	0.569425	0.582026	0.54979	0.561983	0.567797	0.569832	0.596394	0.569464	0.584746	0.596974	0.579021	0.581006	0.593923	0.583099	0.575499	0.571023	0.556213	0.571019	0.567376	0.550143	0.567335	0.560472	0.591105	0.555882
0.5560976	0.582317	0.6	0.589081	0.595308	0.594354	0.586402	0.607194	0.589674	0.59673	0.591978	0.587571	0.604255	0.581717	0.594059	0.5722	0.603774	0.590297	0.597297	0.588076	0.582109	0.564926	0.596491	0.593289	0.596394	0.569848	0.57384	0.595136	0.554149	0.571823	0.580736	0.568627	0.603616	0.571035	0.597734	0.590345	0.591865	0.579832	0.595568	0.59322	0.574286	0.57265	0.554896	0.572662	0.571835	0.560345	0.571839	0.571006	0.592806	0.566372
0.5454545	0.577844	0.595376	0.596045	0.59366	0.578102	0.584958	0.588402	0.590909	0.589812	0.587755	0.583333	0.594142	0.583106	0.586926	0.579017	0.596817	0.602122	0.601064	0.586667	0.596583	0.57444	0.592298	0.59181	0.600273	0.565986	0.580913	0.599156	0.550484	0.581522	0.598886	0.564738	0.615595	0.575305	0.5961	0.599729	0.595862	0.595041	0.604905	0.602778	0.589888	0.571429	0.568513	0.5686	0.573427	0.567797	0.570622	0.569767	0.577086	0.550725
0.5525040	0.578788	0.614035	0.611429	0.606414	0.573117	0.591549	0.595136	0.608108	0.604336	0.596974	0.601124	0.589563	0.595041	0.607595	0.593289	0.608579	0.624665	0.61828	0.609164	0.602922	0.577896	0.595973	0.59012	0.595862	0.577717	0.584615	0.603129	0.576224	0.576923	0.594366	0.559889	0.603043	0.570645	0.6	0.592593	0.582985	0.607242	0.600551	0.601124	0.616477	0.603399	0.575221	0.589413	0.588402	0.588571	0.585714	0.585294	0.618026	0.568915
0.5642738	0.584375	0.611446	0.597059	0.576577	0.56621	0.576812	0.597938	0.591667	0.612813	0.596888	0.609827	0.592163	0.577904	0.599132	0.576552	0.592287	0.586777	0.604972	0.590028	0.594816	0.585499	0.593103	0.592593	0.58156	0.574257	0.57554	0.58858	0.558273	0.562147	0.571014	0.573066	0.594595	0.572638	0.594203	0.598025	0.591105	0.593123	0.592068	0.575144	0.584795	0.597668	0.559271	0.583211	0.57933	0.564706	0.573529	0.59697	0.583211	0.549849
0.5435540	0.552845	0.5759	0.564886	0.586584	0.563291	0.550376	0.577982	0.57554	0.580087	0.571847	0.572714	0.569277	0.584435	0.573574	0.574286	0.579173	0.573466	0.566524	0.550933	0.570622	0.555241	0.571429	0.5625	0.588235	0.539589	0.561194	0.586626	0.552239	0.576867	0.568421	0.549777	0.587021	0.564327	0.577444	0.567252	0.550595	0.576523	0.56094	0.581709	0.579666	0.547655	0.549763	0.547401	0.546828	0.555725	0.555725	0.548032	0.574924	0.562009
0.5371025	0.553542	0.583201	0.568779	0.565561	0.551282	0.569254	0.575851	0.561863	0.563504	0.563798	0.579666	0.579268	0.564636	0.592705	0.560694	0.574315	0.571429	0.570188	0.55733	0.571429	0.553009	0.572254	0.574713	0.571429	0.545994	0.564955	0.569231	0.540786	0.565926	0.56621	0.547368	0.585075	0.547337	0.572298	0.579882	0.554217	0.583459	0.57058	0.564492	0.562212	0.563553	0.5472	0.560372	0.553517	0.537867	0.562597	0.555024	0.578947	0.55008
0.5606557	0.552995	0.58963	0.599132	0.584933	0.580838	0.559201	0.591304	0.588235	0.595336	0.568245	0.588905	0.602857	0.594142	0.598291	0.586956	0.597015	0.58616	0.595918	0.570259	0.596774	0.576819	0.597826	0.6	0.589386	0.573816	0.566572	0.610951	0.560906	0.59249	0.593438	0.569817	0.610644	0.572222	0.593438	0.616667	0.579096	0.606488	0.594142	0.600284	0.584173	0.591105	0.57997	0.582609	0.595989	0.578871	0.593343	0.590164	0.597101	0.573551
0.5513699	0.5632	0.582434	0.586466	0.577573	0.576324	0.56	0.590361	0.570213	0.57468	0.575144	0.573117	0.596439	0.570188	0.573964	0.557747	0.57384	0.559775	0.572638	0.574257	0.557103	0.553073	0.569014	0.571429	0.568116	0.552023	0.544118	0.583832	0.544118	0.562771	0.568889	0.550512	0.590116	0.544669	0.574815	0.579251	0.554252	0.582723	0.570188	0.573117	0.562033	0.554396	0.553655	0.563253	0.559524	0.547368	0.550376	0.573643	0.578313	0.537867
0.5622896	0.576378	0.594841	0.592593	0.577912	0.579755	0.569343	0.590504	0.584615	0.58906	0.592593	0.582242	0.602339	0.590585	0.586006	0.566667	0.601942	0.588072	0.589708	0.582985	0.552198	0.561983	0.580556	0.58011	0.594286	0.595442	0.571014	0.59292	0.571014	0.577525	0.578102	0.565657	0.595989	0.568182	0.578102	0.585227	0.569364	0.574315	0.596291	0.599709	0.580265	0.56975	0.569678	0.58457	0.571847	0.56	0.56	0.564886	0.590504	0.560122
0.5508197	0.574501	0.607407	0.596237	0.584933	0.583832	0.579173	0.602899	0.596443	0.587106	0.590529	0.59175	0.597143	0.6053	0.598291	0.603261	0.624152	0.602442	0.614966	0.597544	0.591398	0.592992	0.605978	0.605405	0.603352	0.5961	0.586402	0.610951	0.589235	0.59249	0.593438	0.5811	0.610644	0.597222	0.610556	0.605556	0.59322	0.586742	0.613668	0.617354	0.595684	0.582496	0.588939	0.591304	0.593123	0.58466	0.578871	0.581222	0.594203	0.579495
0.5451448	0.563694	0.588957	0.568862	0.556575	0.56124	0.560472	0.584708	0.576271	0.575071	0.57554	0.564706	0.567208	0.567723	0.57732	0.569425	0.577031	0.57423	0.567416	0.574648	0.554785	0.556328	0.569425	0.571827	0.568543	0.569784	0.553441	0.590164	0.550512	0.568966	0.563422	0.55102	0.596237	0.571019	0.578171	0.568149	0.563504	0.57726	0.585014	0.573529	0.559524	0.581602	0.572755	0.584708	0.574815	0.556886	0.55988	0.570988	0.572714	0.550769
0.5405405	0.562401	0.596651	0.585438	0.573596	0.563077	0.556369	0.583333	0.569425	0.571027	0.577143	0.572263	0.577713	0.572246	0.581871	0.568245	0.581363	0.586926	0.580195	0.584615	0.567493	0.566298	0.579387	0.573407	0.578797	0.574286	0.561047	0.591716	0.555233	0.562054	0.57101	0.552822	0.591954	0.57265	0.582723	0.589744	0.55942	0.564399	0.592275	0.586861	0.558346	0.571429	0.565284	0.580357	0.570588	0.564636	0.549777	0.566616	0.574405	0.552672
0.5451505	0.56964	0.600302	0.586156	0.595489	0.570122	0.56894	0.60472	0.595271	0.599721	0.603399	0.593343	0.581395	0.587234	0.594203	0.574586	0.587586	0.576552	0.591978	0.590846	0.568306	0.567123	0.577348	0.582418	0.585227	0.592068	0.567723	0.601173	0.570605	0.560113	0.571843	0.56528	0.598291	0.570622	0.58926	0.584746	0.574713	0.593974	0.587234	0.593343	0.573939	0.566423	0.578387	0.581121	0.580175	0.553755	0.562592	0.567527	0.578171	0.553706
0.5430464	0.567442	0.606876	0.581022	0.575261	0.567976	0.572662	0.596491	0.587586	0.589212	0.58427	0.579627	0.576369	0.587904	0.589081	0.580822	0.596443	0.596443	0.59808	0.588721	0.590786	0.570652	0.591781	0.585831	0.585916	0.581461	0.577143	0.59593	0.568571	0.57784	0.589928	0.58037	0.607345	0.571429	0.604317	0.582633	0.589744	0.600284	0.601969	0.602583	0.58926	0.570188	0.582202	0.590643	0.595376	0.578102	0.583942	0.598496	0.584795	0.566717
0.5508197	0.571429	0.607407	0.602026	0.570163	0.583832	0.570613	0.597101	0.590971	0.600823	0.590529	0.608819	0.591429	0.6053	0.615385	0.586956	0.599729	0.602442	0.606803	0.603001	0.575269	0.595687	0.605978	0.597297	0.606145	0.601671	0.592068	0.608069	0.566572	0.581363	0.584879	0.578279	0.619048	0.597222	0.610556	0.602778	0.607345	0.603667	0.616457	0.614509	0.607194	0.599713	0.594918	0.605797	0.601719	0.575977	0.593343	0.611028	0.605797	0.582467
0.5566343	0.576631	0.606149	0.606581	0.578102	0.571006	0.575458	0.604584	0.595399	0.610583	0.603306	0.607595	0.59322	0.584828	0.611268	0.58871	0.590604	0.58255	0.592194	0.588394	0.579787	0.597333	0.591398	0.596257	0.588398	0.600551	0.591036	0.606838	0.563025	0.577717	0.5811	0.577406	0.614958	0.596154	0.600846	0.598901	0.589386	0.6053	0.609655	0.604782	0.58606	0.590071	0.590842	0.587393	0.597734	0.577968	0.577968	0.597938	0.587393	0.566813
0.5709729	0.580838	0.615607	0.612994	0.590778	0.589781	0.5961	0.608204	0.606952	0.605898	0.595918	0.591667	0.6053	0.59673	0.617524	0.594954	0.61008	0.61008	0.614362	0.605333	0.591327	0.592885	0.613546	0.597094	0.608458	0.604082	0.59751	0.613221	0.583679	0.592391	0.598886	0.584022	0.604651	0.599729	0.610028	0.591588	0.595862	0.589532	0.615804	0.611111	0.589888	0.596639	0.600583	0.602546	0.595804	0.581921	0.584746	0.590116	0.605375	0.588406
0.5307443	0.570562	0.591508	0.592275	0.581022	0.571006	0.589563	0.598854	0.592693	0.602442	0.581267	0.582279	0.59322	0.587586	0.588732	0.575269	0.598658	0.604027	0.611036	0.596491	0.582447	0.586667	0.596774	0.604278	0.60221	0.592287	0.593838	0.603989	0.57423	0.58597	0.583921	0.566248	0.601108	0.582418	0.600846	0.582418	0.583799	0.60251	0.62069	0.607595	0.59175	0.57305	0.587888	0.590258	0.586402	0.572246	0.583691	0.580265	0.595989	0.572687
0.5570033	0.592366	0.606775	0.592806	0.584435	0.568452	0.592908	0.613833	0.598639	0.603001	0.595568	0.596888	0.590909	0.596394	0.611898	0.589189	0.604588	0.588394	0.584574	0.597015	0.580214	0.579089	0.583784	0.599462	0.591667	0.598338	0.580282	0.621776	0.583099	0.589212	0.595745	0.57784	0.612813	0.588398	0.607092	0.60221	0.595506	0.60028	0.601942	0.602546	0.583691	0.584879	0.58841	0.590778	0.589744	0.595684	0.595684	0.601482	0.59366	0.587888
0.5344262	0.568356	0.58963	0.596237	0.573117	0.55988	0.564907	0.582609	0.571819	0.573388	0.571031	0.58037	0.594286	0.569038	0.595442	0.559783	0.575305	0.569878	0.565986	0.564802	0.543011	0.552561	0.557065	0.556757	0.578212	0.590529	0.569405	0.590778	0.552408	0.556328	0.570613	0.569817	0.588235	0.558333	0.590585	0.577778	0.587571	0.589563	0.594142	0.577525	0.569784	0.568149	0.571002	0.588406	0.578797	0.555716	0.573083	0.575261	0.588406	0.573551
0.5425361	0.560241	0.590116	0.599432	0.57971	0.563877	0.571429	0.59175	0.577957	0.584906	0.577291	0.586592	0.591865	0.583562	0.595804	0.568758	0.602667	0.589333	0.590909	0.592493	0.5786	0.566887	0.595461	0.592298	0.589849	0.596443	0.5758	0.599717	0.5758	0.590164	0.585434	0.567867	0.607978	0.575716	0.593838	0.592087	0.57975	0.581717	0.591781	0.603352	0.579096	0.580282	0.577713	0.59175	0.571027	0.565341	0.585227	0.584795	0.611664	0.574344
0.5612903	0.574886	0.59854	0.593438	0.576419	0.563422	0.571027	0.591429	0.577598	0.581867	0.582418	0.58906	0.597183	0.591472	0.609551	0.587131	0.589023	0.589023	0.58792	0.584118	0.575597	0.585106	0.587131	0.594667	0.597796	0.590659	0.586592	0.607954	0.569832	0.587106	0.587904	0.581363	0.610497	0.580822	0.607595	0.605479	0.587744	0.609179	0.618982	0.597476	0.584397	0.582744	0.594993	0.594286	0.601695	0.579173	0.590585	0.599119	0.597143	0.585651
0.5536000	0.564565	0.608696	0.600567	0.586705	0.57101	0.572626	0.601418	0.589812	0.591398	0.592087	0.5961	0.587413	0.579235	0.594142	0.567244	0.587766	0.585106	0.6	0.590909	0.58498	0.581242	0.604527	0.590728	0.590971	0.589359	0.585298	0.606488	0.574202	0.585831	0.589386	0.574586	0.600823	0.595918	0.603352	0.598639	0.586445	0.596685	0.606557	0.5961	0.594366	0.58427	0.587719	0.598582	0.59467	0.575071	0.583569	0.597668	0.604255	0.575581
0.5544872	0.556391	0.600871	0.609929	0.590449	0.56305	0.562238	0.599432	0.58792	0.594886	0.587432	0.608089	0.593838	0.585499	0.614525	0.581333	0.601864	0.596538	0.608812	0.60241	0.588391	0.592593	0.605333	0.596817	0.578082	0.598361	0.583333	0.60452	0.569444	0.592087	0.584615	0.567082	0.601648	0.591281	0.604196	0.594005	0.581717	0.589212	0.601915	0.60251	0.592384	0.601969	0.58858	0.579546	0.601124	0.58156	0.592908	0.610219	0.599432	0.564774
0.5537459	0.564886	0.60972	0.592806	0.584435	0.571429	0.564539	0.596542	0.579592	0.58663	0.587258	0.588402	0.596591	0.57975	0.609065	0.581081	0.59919	0.593792	0.592693	0.594301	0.574866	0.58445	0.583784	0.58871	0.580556	0.592798	0.597183	0.60745	0.571831	0.580913	0.58156	0.56662	0.593315	0.577348	0.595745	0.58011	0.587079	0.60028	0.599168	0.585573	0.583691	0.576319	0.576523	0.587896	0.586895	0.566906	0.57554	0.586667	0.582133	0.5613
0.5273312	0.573152	0.608442	0.611664	0.606676	0.570588	0.57784	0.598291	0.605653	0.59919	0.59726	0.593007	0.61236	0.584362	0.596639	0.585561	0.59012	0.600801	0.599732	0.590604	0.571429	0.583554	0.590909	0.590426	0.601648	0.59726	0.576602	0.611898	0.590529	0.599179	0.603086	0.568655	0.600551	0.579235	0.611501	0.592896	0.572222	0.582524	0.59808	0.587413	0.582744	0.5811	0.581498	0.581197	0.588732	0.594595	0.588905	0.603221	0.595442	0.569343
0.5354839	0.550681	0.578102	0.590585	0.596798	0.551622	0.562588	0.582857	0.591093	0.581867	0.593407	0.586255	0.588732	0.572215	0.581461	0.563003	0.578313	0.578313	0.58255	0.584118	0.564987	0.566489	0.581769	0.586667	0.597796	0.582418	0.569832	0.599432	0.567039	0.576132	0.576653	0.564673	0.607735	0.578082	0.590717	0.586301	0.576602	0.59249	0.596974	0.603086	0.58156	0.577086	0.580265	0.58	0.579096	0.587732	0.579173	0.590308	0.591429	0.562226
0.5151033	0.555224	0.579251	0.585916	0.589081	0.550218	0.561111	0.583921	0.573333	0.57754	0.569878	0.570637	0.578581	0.559783	0.57975	0.556291	0.579365	0.563492	0.570292	0.574468	0.558322	0.57293	0.574834	0.58498	0.576871	0.578019	0.565517	0.575035	0.548965	0.566396	0.569444	0.56044	0.594816	0.573748	0.588889	0.589986	0.574966	0.582418	0.600544	0.601108	0.579832	0.569832	0.581395	0.578279	0.588564	0.574648	0.577465	0.588406	0.592384	0.569364
0.5474684	0.576523	0.593974	0.586255	0.577968	0.576812	0.567082	0.592697	0.594954	0.599201	0.583784	0.576552	0.573407	0.598105	0.59116	0.569921	0.600791	0.592885	0.5786	0.596027	0.579635	0.581152	0.596306	0.598425	0.598916	0.6	0.596154	0.600559	0.574176	0.585695	0.583679	0.574555	0.611413	0.579515	0.603043	0.603774	0.589041	0.599179	0.608931	0.604138	0.599721	0.59249	0.575977	0.581461	0.594444	0.57784	0.586255	0.588745	0.592697	0.57554
0.5314465	0.573117	0.601997	0.6053	0.59175	0.579251	0.591472	0.603352	0.602378	0.609271	0.594086	0.59808	0.606061	0.608344	0.615385	0.587927	0.613368	0.610747	0.604468	0.59552	0.587013	0.598958	0.611549	0.600522	0.61186	0.615591	0.598361	0.613889	0.587432	0.58255	0.602476	0.582313	0.613514	0.597855	0.618982	0.605898	0.591281	0.60136	0.629879	0.614541	0.601942	0.59751	0.595684	0.594972	0.604972	0.571827	0.588564	0.611191	0.606145	0.575107
0.5285935	0.546512	0.58427	0.585165	0.588235	0.564539	0.585366	0.588721	0.59375	0.597911	0.596027	0.594595	0.580733	0.596817	0.600812	0.597671	0.604651	0.617571	0.611399	0.607792	0.591549	0.598203	0.610608	0.610039	0.602922	0.590728	0.600269	0.615595	0.594886	0.600529	0.609756	0.576407	0.620506	0.599736	0.620596	0.615588	0.58792	0.592493	0.61008	0.610811	0.606557	0.604905	0.569405	0.566712	0.590476	0.576923	0.582418	0.607345	0.596974	0.566197
0.5246914	0.560232	0.569425	0.587106	0.598601	0.558074	0.573748	0.585165	0.590377	0.599739	0.592593	0.591093	0.579946	0.598676	0.581081	0.578811	0.60129	0.596129	0.602846	0.601816	0.585678	0.589744	0.599483	0.59383	0.594164	0.592593	0.583333	0.598361	0.567204	0.568032	0.581867	0.562249	0.603723	0.585752	0.606225	0.601583	0.579089	0.5917	0.596027	0.593792	0.589359	0.587755	0.560113	0.568681	0.595109	0.559671	0.567901	0.586742	0.590659	0.559775
0.5283019	0.581979	0.593438	0.60251	0.594595	0.570605	0.596974	0.603352	0.60502	0.601325	0.604839	0.589849	0.600551	0.605653	0.604396	0.590551	0.600262	0.600262	0.609724	0.606061	0.587013	0.604167	0.60105	0.5953	0.595687	0.594086	0.590164	0.602778	0.57377	0.590604	0.596974	0.582313	0.616216	0.589812	0.605227	0.595174	0.588556	0.609524	0.619112	0.603567	0.59362	0.589212	0.584173	0.583799	0.599448	0.577406	0.577406	0.599713	0.608939	0.575107
0.5302326	0.571429	0.591549	0.595041	0.589888	0.549075	0.592391	0.571035	0.605744	0.599476	0.59761	0.582656	0.60136	0.595745	0.583446	0.586252	0.593264	0.601036	0.597403	0.606771	0.587933	0.607465	0.596628	0.596129	0.593875	0.584329	0.582996	0.592593	0.5722	0.572944	0.584239	0.55914	0.608812	0.580133	0.605978	0.593378	0.573351	0.583333	0.609043	0.598916	0.578082	0.581967	0.568182	0.571035	0.581173	0.567493	0.570248	0.583569	0.595862	0.564972
0.5400982	0.57362	0.58284	0.589595	0.59882	0.559043	0.581197	0.570188	0.595628	0.586301	0.581363	0.571023	0.584879	0.582173	0.57468	0.561737	0.563686	0.577236	0.576087	0.585831	0.563758	0.573351	0.580733	0.582996	0.582985	0.564673	0.562942	0.58705	0.560113	0.558333	0.561254	0.546479	0.581818	0.568655	0.60114	0.574202	0.558533	0.56338	0.593315	0.588068	0.568966	0.567335	0.555224	0.567294	0.577968	0.560694	0.566474	0.580357	0.590449	0.560831
0.5301587	0.566319	0.607194	0.604782	0.608321	0.569767	0.604716	0.611268	0.612517	0.603471	0.609756	0.594744	0.611111	0.60787	0.595568	0.587302	0.597094	0.607662	0.598676	0.608234	0.586387	0.585302	0.611111	0.610526	0.603261	0.596206	0.589532	0.602241	0.573003	0.58728	0.588072	0.570645	0.599455	0.605405	0.615811	0.602703	0.593407	0.581619	0.618725	0.605809	0.593007	0.574616	0.583454	0.580282	0.584958	0.57384	0.576653	0.60492	0.6	0.562771
0.5161290	0.550681	0.59562	0.601997	0.599709	0.566372	0.579465	0.594286	0.59919	0.592693	0.585165	0.575035	0.588732	0.58597	0.58427	0.573727	0.586345	0.594378	0.601342	0.58681	0.578249	0.577128	0.592493	0.597333	0.597796	0.582418	0.575419	0.599432	0.558659	0.565158	0.565401	0.561891	0.585635	0.586301	0.601969	0.591781	0.582173	0.595271	0.610729	0.586255	0.575886	0.574257	0.574374	0.577143	0.590395	0.56776	0.576319	0.602056	0.6	0.553441
0.5339652	0.560831	0.590258	0.588235	0.605714	0.552822	0.585635	0.59467	0.596817	0.601064	0.585695	0.589532	0.591978	0.597297	0.57931	0.57444	0.597368	0.594737	0.60686	0.600529	0.573664	0.580392	0.59552	0.600262	0.606225	0.596491	0.584362	0.608089	0.578875	0.576819	0.577348	0.579235	0.602442	0.58681	0.61326	0.592194	0.590971	0.598361	0.618919	0.614325	0.593315	0.583333	0.580925	0.580645	0.582524	0.568627	0.579832	0.59366	0.59467	0.583333
0.5238880	0.555556	0.604167	0.59593	0.593472	0.562406	0.587393	0.60262	0.596154	0.589532	0.587413	0.571429	0.591105	0.588235	0.586552	0.58663	0.59673	0.615804	0.603825	0.59726	0.585695	0.579161	0.58663	0.58616	0.58345	0.584615	0.583215	0.593343	0.577525	0.564246	0.587393	0.558074	0.587904	0.580195	0.613181	0.582985	0.592908	0.592068	0.619048	0.6	0.598266	0.585014	0.591592	0.582242	0.589928	0.572674	0.578488	0.601796	0.599709	0.558209
0.5463259	0.578711	0.602026	0.599717	0.591631	0.567252	0.608089	0.617564	0.599732	0.612081	0.607629	0.584145	0.603352	0.60573	0.601671	0.579787	0.59761	0.613546	0.604527	0.619493	0.592105	0.585752	0.609043	0.613757	0.601093	0.585831	0.590028	0.602817	0.584488	0.579592	0.580195	0.568276	0.605479	0.595109	0.619247	0.605978	0.607735	0.593103	0.627558	0.611961	0.59353	0.58906	0.583942	0.592068	0.585434	0.579915	0.585573	0.60262	0.606232	0.56894
0.5293185	0.547619	0.589081	0.589888	0.590258	0.55733	0.576177	0.585091	0.590426	0.592	0.58728	0.58011	0.590846	0.579946	0.578147	0.568032	0.593668	0.591029	0.587302	0.599469	0.575163	0.587156	0.594452	0.60184	0.580733	0.571042	0.588721	0.601399	0.569464	0.581081	0.590028	0.564384	0.598639	0.585695	0.603878	0.596491	0.587106	0.586301	0.609756	0.599448	0.600559	0.587744	0.571014	0.568214	0.584145	0.58427	0.578652	0.583815	0.599156	0.564841
0.5175719	0.557721	0.575977	0.596888	0.585859	0.576023	0.580195	0.586402	0.597055	0.595973	0.585831	0.5758	0.592179	0.58663	0.587744	0.577128	0.59761	0.602922	0.591212	0.595461	0.586842	0.593668	0.601064	0.592593	0.590164	0.585831	0.606648	0.591549	0.576177	0.579592	0.596932	0.568276	0.610959	0.589674	0.627615	0.586956	0.593923	0.606897	0.619372	0.609179	0.607595	0.603086	0.586861	0.583569	0.596639	0.5686	0.591231	0.588064	0.589235	0.560232
0.5144695	0.542986	0.567686	0.58606	0.56894	0.552941	0.57784	0.589744	0.58681	0.580297	0.575342	0.573427	0.587079	0.565158	0.568627	0.569519	0.568758	0.59279	0.5917	0.593289	0.57672	0.583554	0.590909	0.595745	0.57967	0.586301	0.593315	0.580736	0.562674	0.574555	0.58345	0.560333	0.603306	0.590164	0.605891	0.590164	0.575	0.588072	0.609054	0.593007	0.585573	0.589563	0.581498	0.581197	0.583099	0.560455	0.583215	0.597365	0.584046	0.554744
0.5298869	0.551515	0.576023	0.588571	0.571429	0.54062	0.577465	0.572246	0.586487	0.574526	0.566712	0.570225	0.575458	0.581267	0.559775	0.574497	0.576407	0.589812	0.575269	0.603774	0.571049	0.575233	0.58792	0.58745	0.582069	0.583219	0.584615	0.59175	0.556643	0.571429	0.583099	0.545961	0.600277	0.578875	0.591549	0.584362	0.580195	0.579387	0.603306	0.598315	0.588068	0.572238	0.575221	0.575107	0.577086	0.554286	0.574286	0.582353	0.589413	0.560117
0.5187602	0.544342	0.578171	0.590778	0.582353	0.557377	0.568182	0.574315	0.577657	0.5847	0.568655	0.572238	0.59175	0.580556	0.58156	0.568336	0.583784	0.586487	0.585366	0.600544	0.578313	0.585235	0.584574	0.589502	0.59249	0.585298	0.592384	0.591105	0.555712	0.576177	0.590909	0.558989	0.599721	0.572614	0.599432	0.591978	0.587904	0.601124	0.622222	0.594901	0.593123	0.574286	0.58631	0.588745	0.582026	0.564841	0.576369	0.58457	0.597403	0.568047
0.5331230	0.568889	0.600858	0.601399	0.593438	0.569364	0.598621	0.593838	0.601325	0.608234	0.598383	0.572215	0.610497	0.596491	0.589532	0.573684	0.596583	0.604468	0.600791	0.620872	0.580729	0.592689	0.615789	0.612565	0.613514	0.598383	0.59726	0.610028	0.567123	0.605653	0.598621	0.572988	0.623306	0.599462	0.623448	0.599462	0.598361	0.594816	0.626181	0.61348	0.600835	0.588072	0.582973	0.602241	0.590028	0.587413	0.601399	0.61295	0.621849	0.588235
0.5486443	0.577844	0.601156	0.61017	0.596542	0.569343	0.598886	0.596888	0.612299	0.608579	0.609524	0.591667	0.608089	0.60218	0.595271	0.589641	0.594164	0.607427	0.606383	0.613333	0.588699	0.582345	0.613546	0.60502	0.60573	0.593197	0.594744	0.604782	0.57538	0.600544	0.582173	0.581267	0.610123	0.58616	0.62117	0.599729	0.595862	0.600551	0.613079	0.611111	0.601124	0.585434	0.58309	0.591231	0.584615	0.584746	0.59322	0.610465	0.61669	0.57971
0.5385878	0.56	0.593472	0.591304	0.568047	0.554723	0.58	0.583454	0.589041	0.57967	0.582985	0.581197	0.595136	0.592179	0.582026	0.576871	0.581522	0.597826	0.588556	0.590164	0.573351	0.585695	0.60136	0.598105	0.593007	0.585774	0.58156	0.594517	0.561702	0.587744	0.585714	0.559322	0.58906	0.578581	0.602857	0.598053	0.585573	0.587571	0.614525	0.592593	0.596542	0.568966	0.571856	0.571843	0.582496	0.571014	0.57971	0.60597	0.600871	0.577381
0.5273312	0.558069	0.60262	0.614509	0.600871	0.576471	0.603086	0.603989	0.608344	0.607287	0.608219	0.59021	0.606742	0.59808	0.596639	0.588235	0.603471	0.608812	0.613119	0.614765	0.589947	0.599469	0.614973	0.614362	0.612637	0.594521	0.601671	0.606232	0.568245	0.599179	0.591865	0.57975	0.61157	0.598361	0.608696	0.595628	0.6	0.601942	0.633745	0.60979	0.605375	0.589563	0.596182	0.60114	0.6	0.58606	0.600284	0.620791	0.615385	0.589781
0.5287356	0.566154	0.58457	0.597101	0.585799	0.557721	0.585714	0.583454	0.591781	0.587912	0.577406	0.569801	0.589413	0.575419	0.573466	0.565986	0.584239	0.595109	0.583106	0.592896	0.576043	0.582996	0.590476	0.584574	0.595804	0.569038	0.584397	0.603175	0.561702	0.5961	0.597143	0.567797	0.608696	0.584145	0.6	0.595271	0.588402	0.587571	0.620112	0.606838	0.590778	0.574713	0.568862	0.583454	0.585366	0.591304	0.571014	0.58806	0.595065	0.568452
0.5188834	0.535385	0.596439	0.588406	0.573964	0.566717	0.58	0.577649	0.583562	0.585165	0.577406	0.57265	0.577968	0.569832	0.579173	0.57415	0.586956	0.592391	0.583106	0.590164	0.576043	0.574899	0.585034	0.584574	0.576224	0.574616	0.57305	0.582973	0.541844	0.573816	0.562857	0.556497	0.58906	0.561891	0.591429	0.584145	0.5686	0.581921	0.603352	0.589744	0.582133	0.577586	0.571856	0.56894	0.573888	0.55942	0.568116	0.591045	0.583454	0.556548
0.5224626	0.557632	0.57958	0.57478	0.577844	0.546282	0.589595	0.587372	0.587258	0.575	0.575458	0.570605	0.58466	0.570622	0.577201	0.56121	0.568681	0.590659	0.581267	0.593923	0.565986	0.570259	0.574966	0.580027	0.571429	0.575458	0.559541	0.59562	0.548063	0.560563	0.563584	0.557143	0.592908	0.559775	0.583815	0.585091	0.58083	0.582857	0.590395	0.587896	0.574344	0.569767	0.569697	0.56975	0.571843	0.568915	0.568915	0.589124	0.590308	0.566265
0.58606	0.791515	0.836745	0.806313	0.782933	0.773745	0.812257	0.813108	0.836191	0.842281	0.829856	0.830341	0.828121	0.851257	0.827848	0.861639	0.868592	0.867882	0.878416	0.865426	0.862063	0.893088	0.906761	0.917949	1
[truncated: 430 more columns]
